# Supplementary material for: Asymmetric sequential annulation/aldol process of 4-isothiocyanato pyrazolones and allenones: access to novel spiro[pyrrole–pyrazolones] and spiro[thiopyranopyrrole–pyrazolones]
Source: Royal Society of Chemistry journal article supplement (doi:10.1039/d0cc07113g), 2020-12-10

**Asymmetric sequential annulation/aldol process of 4-isothiocyanato pyrazolones and allenones: access to novel spiro[pyrrole-pyrazolones] and spiro[thiopyranopyrrole-pyrazolones]**

Wenyao Wang, Xiaoze Bao, Shiqiang Wei, Shah Nawaz, Jingping Qu and Baomin Wang\*

State Key Laboratory of Fine Chemicals, Department of Pharmaceutical Sciences, School of Chemical Engineering, Dalian University of Technology, Dalian 116024, People's Republic of China. E-mail: bmwang@dlut.edu.cn

Contents:

|                                                                               |     |
|-------------------------------------------------------------------------------|-----|
| 1. General information -----                                                  | S1  |
| 2. Experimental procedures and characterization of compounds <b>4-7</b> ----- | S1  |
| 3. X-ray structures of <b>5af</b> and <b>5''af</b> -----                      | S34 |
| 4. References-----                                                            | S35 |
| 5. NMR spectra for compounds -----                                            | S36 |

## 1. General information

Unless otherwise noted, materials were purchased from commercial suppliers and used without further purification. Column chromatography was performed on silica gel (200~300 mesh). Enantiomeric excesses (ee) were determined by HPLC using corresponding commercial chiral columns as stated at 30 °C with UV detector at 254 nm. Optical rotations were reported as follows:  $[\alpha]_D^{25}$  (c g/100 mL, solvent). All  $^1\text{H}$  NMR and  $^{19}\text{F}$  NMR spectra were recorded on a Bruker Avance II 400 MHz, Bruker Avance II 500 MHz and Bruker Avance III 600 MHz respectively,  $^{13}\text{C}$  NMR spectra were recorded on a Bruker Avance II 101 MHz or Bruker Avance III 151 MHz with chemical shifts reported as ppm (in  $\text{CDCl}_3$ , TMS as an internal standard). Data for  $^1\text{H}$  NMR are recorded as follows: chemical shift ( $\delta$ , ppm), multiplicity (s = singlet, d = doublet, t = triplet, m = multiplet, br = broad singlet, dd = double doublet, coupling constants in Hz, integration). HRMS (ESI) was obtained with a HRMS/MS instrument (LTQ Orbitrap XL TM). The absolute configuration of **4** was assigned by the X-ray analysis.

4-isothiocyanato pyrazolones were prepared according to the literature.<sup>1</sup> Allenyl ketones were prepared according to the literature.<sup>2</sup> Catalyst **Q4** and **Q5** were synthesized according to the literature procedure.<sup>3</sup> The racemic products were synthesized using quinine/quinidine = 1:1 as the catalyst.

## 2. Experimental procedures and characterization of compounds **4**, **5**

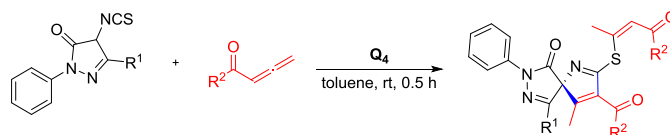

A tube equipped with a magnetic stir bar was charged with 4-isothiocyanato pyrazolone **1** (0.2 mmol), **Q4** (0.02 mmol), and toluene (2 mL). After stirring for 5 min, alkynyl ketone **2** (0.5 mmol) was added in one portion. The reaction was detected by TLC. After 0.5 h, the mixture was purified by column chromatography on silica gel (unless otherwise noticed, petroleum ether/EtOAc = 20:1 was used as the eluent) directly to give the product **4**.

### Compound **4aa**

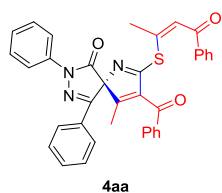

Prepared according to the procedure within 0.5 h as colorless oil (76.7 mg, 66% yield).  $[\alpha]_D^{17} = -186.79$  (c 0.41,  $\text{CH}_2\text{Cl}_2$ ),  $^1\text{H}$  NMR (400 MHz, Chloroform-*d*)  $\delta$  8.02 (d,  $J = 7.7$  Hz, 2H), 8.00-7.96 (m, 2H), 7.85-7.81 (m, 2H), 7.69-7.61 (m, 2H), 7.58 (d,  $J = 6.2$  Hz, 2H), 7.55-7.39 (m, 8H), 7.30 (t,  $J = 7.7$  Hz, 3H), 2.51 (d,  $J = 1.4$  Hz, 3H), 1.87 (s, 3H);  $^{13}\text{C}$  NMR (101 MHz, Chloroform-*d*)  $\delta$  190.6, 189.3, 175.2, 165.2, 162.2, 153.9, 148.3, 140.3, 138.2, 137.7, 136.4, 134.6, 132.8, 131.6, 129.9, 129.8, 129.2, 129.1, 128.5, 128.5, 128.0, 126.2, 125.9, 119.2, 93.79, 21.9, 12.9. HRMS (ESI)  $m/z$  Calcd. for  $\text{C}_{25}\text{H}_{17}\text{N}_3\text{O}_2\text{S}$  ( $[\text{M}+\text{H}]^+$ ) 412.1114, Found 412.1114. Enantiomeric excess was determined to be 99% (determined by HPLC using chiral AD-H column, hexane/2-propanol = 7/3,  $\lambda = 254$  nm, 30 °C, 0.8 mL/min,  $t_{\text{major}} = 16.9$  min,  $t_{\text{minor}} = 6.8$  min).

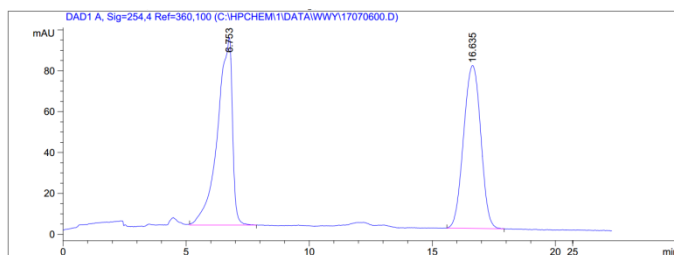

| Peak # | RetTime [min] | Type | Width [min] | Area [mAU*s] | Height [mAU] | Area %  |
|--------|---------------|------|-------------|--------------|--------------|---------|
| 1      | 6.753         | BB   | 0.5407      | 3863.63428   | 91.85115     | 49.9834 |
| 2      | 16.635        | BB   | 0.6674      | 3866.19287   | 79.77332     | 50.0166 |

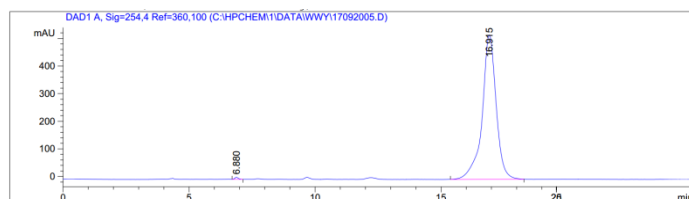

| Peak # | RetTime [min] | Type | Width [min] | Area [mAU*s] | Height [mAU] | Area %  |
|--------|---------------|------|-------------|--------------|--------------|---------|
| 1      | 6.880         | VB   | 0.1487      | 71.85115     | 7.31070      | 0.3545  |
| 2      | 16.915        | BB   | 0.5763      | 2.01937e4    | 523.21265    | 99.6455 |

### Compound 4ba

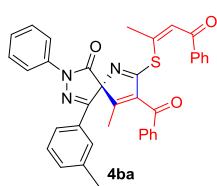

Prepared according to the procedure within 0.5 h as colorless oil (86.8 mg, 73% yield);  $[\alpha]_D^{17} = -110.66$  (c 0.31,  $\text{CH}_2\text{Cl}_2$ );  $^1\text{H}$  NMR (400 MHz, Chloroform-*d*)  $\delta$  8.03 (d,  $J = 8.7$  Hz, 2H), 7.97 (d,  $J = 7.7$  Hz, 2H), 7.84 (d,  $J = 7.7$  Hz, 2H), 7.65 (s, 2H), 7.56-7.41 (m, 6H), 7.36-7.25 (m, 5H), 7.25 (s, 1H), 2.51 (d,  $J = 1.6$  Hz, 3H), 2.39 (s, 3H), 1.87 (s, 3H).  $^{13}\text{C}$  NMR (101 MHz, Chloroform-*d*)  $\delta$  190.5, 189.3, 175.1, 165.2, 162.2, 154.0, 148.2, 140.4, 138.9, 138.3, 137.71, 136.5, 134.5, 132.8, 132.4, 129.9, 129.8, 129.1, 128.5, 128.5, 127.9, 126.4, 126.1, 123.1, 93.9, 21.8, 21.5, 12.9. HRMS (ESI)  $m/z$  Calcd. for  $\text{C}_{37}\text{H}_{29}\text{N}_3\text{O}_3\text{S}$  ( $[\text{M}+\text{H}]^+$ ) 596.2002, Found 596.1992. Enantiomeric excess was determined to be 95% (determined by HPLC using chiral AD-H column, hexane/2-propanol = 7/3,  $\lambda = 254$  nm, 30 °C, 0.8 mL/min,  $t_{\text{major}} = 10.8$  min,  $t_{\text{minor}} = 6.3$  min).

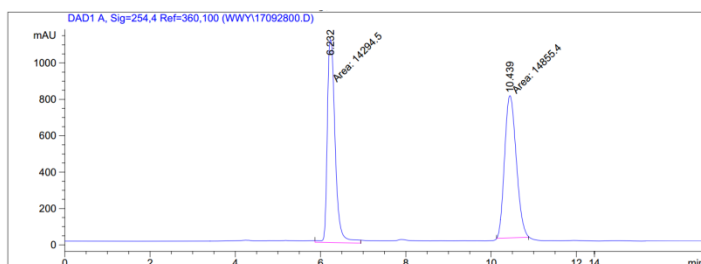

| Peak # | RetTime [min] | Type | Width [min] | Area [mAU*s] | Height [mAU] | Area %  |
|--------|---------------|------|-------------|--------------|--------------|---------|
| 1      | 6.232         | MM   | 0.2134      | 1.42945e4    | 1116.20996   | 49.0379 |
| 2      | 10.439        | MM   | 0.3165      | 1.48554e4    | 782.36310    | 50.9621 |

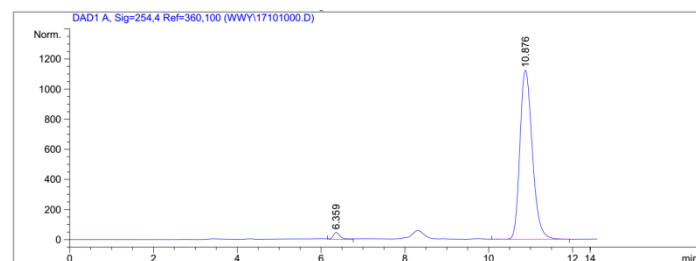

| Peak # | RetTime [min] | Type | Width [min] | Area [mAU*s] | Height [mAU] | Area %  |
|--------|---------------|------|-------------|--------------|--------------|---------|
| 1      | 6.359         | VB   | 0.1741      | 550.99896    | 46.53965     | 2.3282  |
| 2      | 10.876        | VP   | 0.3179      | 2.31150e4    | 1124.17139   | 97.6718 |

### Compound 4ca

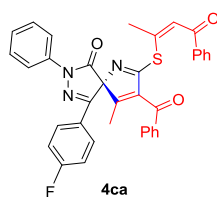

Prepared according to the procedure within 0.5 h as colorless oil (87.6 mg, 73% yield);  $[\alpha]_D^{16} = -170.63$  (*c* 0.36,  $\text{CH}_2\text{Cl}_2$ );  $^1\text{H NMR}$  (400 MHz, Chloroform-*d*)  $\delta$  8.06-7.95 (m, 4H), 7.88-7.82 (m, 2H), 7.70-7.61 (m, 2H), 7.60-7.43 (m, 7H), 7.38-7.26 (m, 3H), 7.12 (t, *J* = 8.6 Hz, 2H), 2.52 (d, *J* = 1.3 Hz, 3H), 1.86 (s, 3H);  $^{13}\text{C NMR}$  (101 MHz, Chloroform-*d*)  $\delta$  190.5, 189.2, 175.4, 165.0, 164.6 (d, *J* = 253.4 Hz), 161.8, 152.9, 148.1, 140.5, 138.2, 137.6, 136.4, 134.6, 132.9, 129.8, 129.1 (d, *J* = 1.4 Hz), 128.5, 128.5, 128.1 (d, *J* = 8.7 Hz), 126.2, 126.2, 119.2, 116.5 (d, *J* = 22.3 Hz), 93.7, 21.8, 12.8;  $^{19}\text{F NMR}$  (470 MHz, Chloroform-*d*)  $\delta$  -106.82 - -107.02 (m). HRMS (ESI) *m/z* Calcd. for  $\text{C}_{25}\text{H}_{17}\text{N}_3\text{O}_2\text{S}$  ( $[\text{M}+\text{H}]^+$ ) 412.1114, Found 412.1114. Enantiomeric excess was determined to be 98% (determined by HPLC using chiral AD-H column, hexane/2-propanol = 7/3,  $\lambda$  = 254 nm, 30 °C, 0.8 mL/min, *t*<sub>major</sub> = 6.5 min, *t*<sub>minor</sub> = 9.2 min).

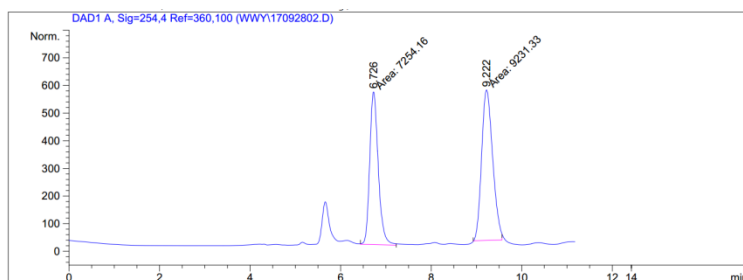

| Peak # | RetTime [min] | Type | Width [min] | Area [mAU*s] | Height [mAU] | Area %  |
|--------|---------------|------|-------------|--------------|--------------|---------|
| 1      | 6.726         | MM   | 0.2187      | 7254.15820   | 552.89337    | 44.0033 |
| 2      | 9.222         | MM   | 0.2824      | 9231.32813   | 544.88361    | 55.9967 |

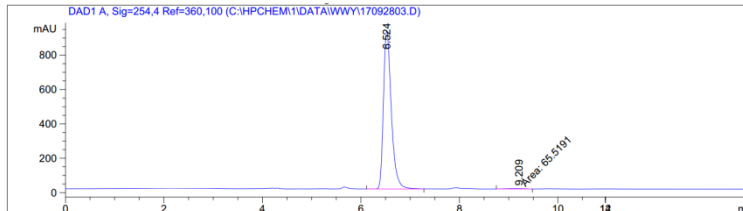

| Peak # | RetTime [min] | Type | Width [min] | Area [mAU*s] | Height [mAU] | Area %  |
|--------|---------------|------|-------------|--------------|--------------|---------|
| 1      | 6.524         | PB   | 0.1693      | 1.02031e4    | 920.88086    | 99.3620 |
| 2      | 9.209         | MM   | 0.4906      | 65.51913     | 2.22561      | 0.6380  |

### Compound 4da

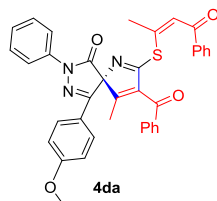

Prepared according to the procedure within 0.5 h as colorless oil (89.2 mg, 73% yield);  $[\alpha]_D^{17} = -189.91$  (*c* 0.37,  $\text{CH}_2\text{Cl}_2$ );  $^1\text{H NMR}$  (400 MHz, Chloroform-*d*)  $\delta$  8.02 (d, *J* = 7.5 Hz, 2H), 7.98 (d, *J* = 7.0 Hz, 2H), 7.84 (d, *J* = 7.0 Hz, 2H), 7.69-7.61 (m, 2H), 7.56-7.42 (m, 7H), 7.37-7.26 (m, 3H), 6.92 (d, *J* = 8.9 Hz, 2H), 3.83 (s, 3H), 2.52 (d, *J* = 1.3 Hz, 3H), 1.86 (s, 3H);  $^{13}\text{C NMR}$  (101 MHz, Chloroform-*d*)  $\delta$  190.7, 189.3, 174.9, 165.0, 162.4, 162.2, 153.6, 148.4, 140.2, 138.3, 137.8, 136.5, 134.5, 132.8, 129.8, 129.1, 129.1, 128.5, 128.5, 127.8, 127.6, 125.9, 122.6, 119.2, 114.6, 94.0, 55.5, 21.8, 12.9. HRMS (ESI) *m/z* Calcd. for  $\text{C}_{37}\text{H}_{30}\text{N}_3\text{O}_4\text{S}$  ( $[\text{M}+\text{H}]^+$ ) 612.1952, Found 612.1941. Enantiomeric excess was determined to be 99% (determined by HPLC using chiral AD-H column, hexane/2-propanol = 7/3,  $\lambda$  = 254 nm, 30 °C, 0.8 mL/min, *t*<sub>major</sub> = 11.9 min, *t*<sub>minor</sub> = 9.9 min).

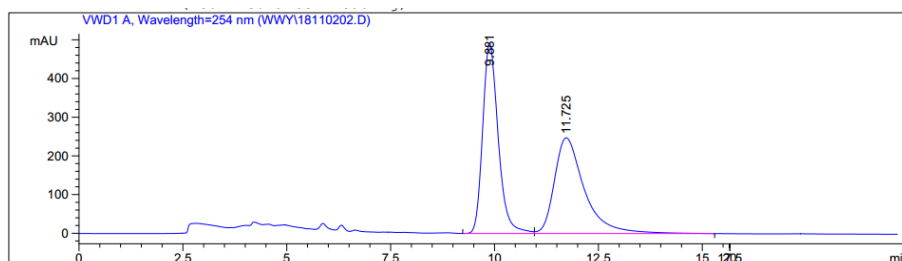

| Peak # | RetTime [min] | Type | Width [min] | Area mAU*s | Height [mAU] | Area %  |
|--------|---------------|------|-------------|------------|--------------|---------|
| 1      | 9.881         | VV   | 0.3990      | 1.28114e4  | 491.12912    | 50.7615 |
| 2      | 11.725        | VB   | 0.7502      | 1.24270e4  | 247.55083    | 49.2385 |

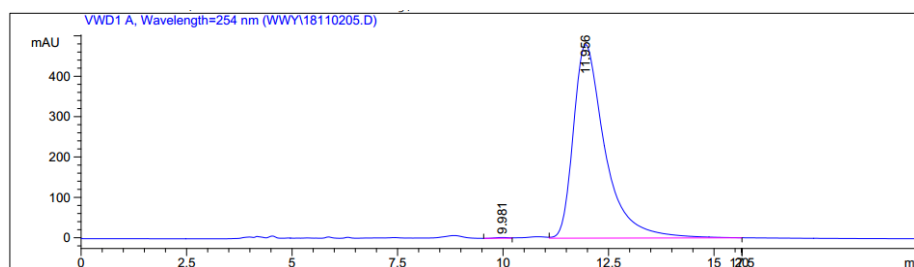

| Peak # | RetTime [min] | Type | Width [min] | Area mAU*s | Height [mAU] | Area %  |
|--------|---------------|------|-------------|------------|--------------|---------|
| 1      | 9.981         | VV   | 0.3307      | 45.24305   | 2.05804      | 0.1809  |
| 2      | 11.956        | VB   | 0.7778      | 2.49598e4  | 479.41721    | 99.8191 |

### Compound 4ea

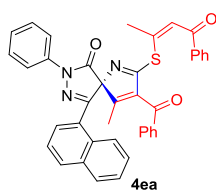

Prepared according to the procedure within 0.5 h as colorless oil (88.3 mg, 70% yield);  $[\alpha]_D^{18} = -171.66$  ( $c$  0.44,  $\text{CH}_2\text{Cl}_2$ );  $^1\text{H NMR}$  (400 MHz, Chloroform- $d$ )  $\delta$  9.27 (d,  $J = 8.6$  Hz, 1H), 8.08 (dd,  $J = 8.7, 1.2$  Hz, 2H), 7.95 (d,  $J = 8.3$  Hz, 1H), 7.91 (m, 3H), 7.85-7.80 (m, 2H), 7.71-7.58 (m, 4H), 7.58-7.40 (m, 7H), 7.33 (t,  $J = 7.4$  Hz, 1H), 7.28 (d,  $J = 8.2$  Hz, 1H), 7.12 (d,  $J = 6.3$  Hz, 1H), 2.50 (d,  $J = 1.3$  Hz, 3H), 1.90 (s, 3H);  $^{13}\text{C NMR}$  (101 MHz, Chloroform- $d$ )  $\delta$  190.6, 189.3, 174.9, 164.7, 162.5, 154.6, 148.4, 140.4, 138.2, 137.7, 136.5, 134.5, 134.3, 132.8, 132.3, 130.5, 129.7, 129.2, 129.1, 129.0, 128.5, 128.4, 128.2, 127.8, 127.1, 126.6, 126.2, 126.1, 126.1, 125.1, 119.2, 95.1, 21.9, 12.9. HRMS (ESI)  $m/z$  Calcd. for  $\text{C}_{40}\text{H}_{30}\text{N}_3\text{O}_3\text{S}$  ( $[\text{M}+\text{H}]^+$ ) 632.2002, Found 632.2005. Enantiomeric excess was determined to be 79% (determined by HPLC using chiral AD-H column, hexane/2-propanol = 7/3,  $\lambda = 254$  nm, 30 °C, 0.8 mL/min,  $t_{\text{major}} = 9.8$  min,  $t_{\text{minor}} = 7.3$  min).

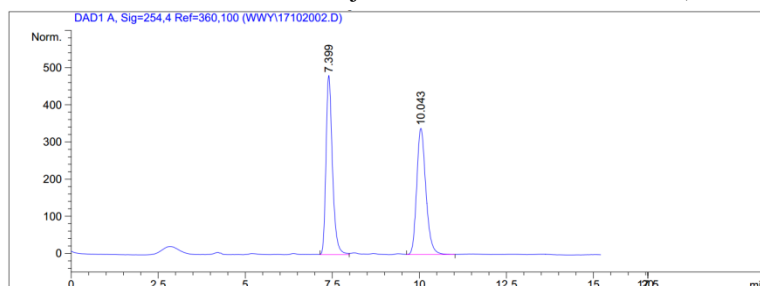

| Peak # | RetTime [min] | Type | Width [min] | Area [mAU*s] | Height [mAU] | Area %  |
|--------|---------------|------|-------------|--------------|--------------|---------|
| 1      | 7.399         | BV   | 0.1942      | 6206.65186   | 481.99774    | 49.9461 |
| 2      | 10.043        | VB   | 0.2817      | 6220.06006   | 339.50171    | 50.0539 |

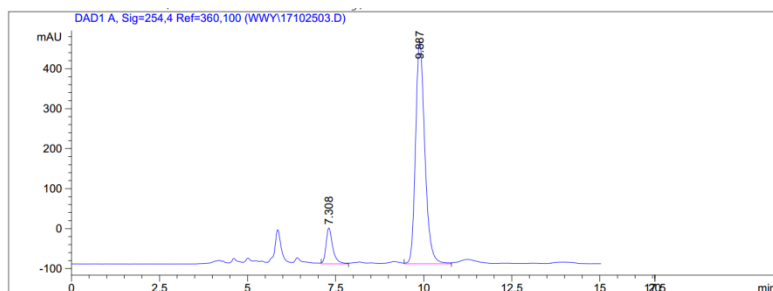

| Peak # | RetTime [min] | Type | Width [min] | Area [mAU*s] | Height [mAU] | Area %  |
|--------|---------------|------|-------------|--------------|--------------|---------|
| 1      | 7.308         | BB   | 0.1993      | 1195.61414   | 89.84445     | 10.5077 |
| 2      | 9.887         | VB   | 0.2860      | 1.01829e4    | 555.11523    | 89.4923 |

### Compound 4fa

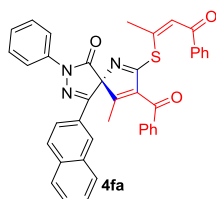

Prepared according to the procedure within 0.5 h as colorless oil (84.5 mg, 67% yield);  $[\alpha]_D^{16} = -120.66$  ( $c$  0.36,  $\text{CH}_2\text{Cl}_2$ );  $^1\text{H}$  NMR (400 MHz, Chloroform- $d$ )  $\delta$  8.09-8.04 (m, 2H), 8.00 (t,  $J = 6.8$  Hz, 3H), 7.89 (d,  $J = 8.7$  Hz, 1H), 7.86-7.77 (m, 4H), 7.73 (d,  $J = 1.7$  Hz, 1H), 7.69-7.60 (m, 2H), 7.56-7.47 (m, 6H), 7.41 (t,  $J = 7.4$  Hz, 1H), 7.30 (t,  $J = 7.5$  Hz, 1H), 7.25-7.21 (m, 2H), 2.54 (d,  $J = 1.2$  Hz, 3H), 1.90 (s, 3H);  $^{13}\text{C}$  NMR (101 MHz, Chloroform- $d$ )  $\delta$  190.6, 189.3, 175.3, 165.2, 162.3, 153.7, 148.2, 140.5, 138.2, 137.7, 136.5, 134.7, 134.6, 132.9, 132.8, 129.8, 129.2, 129.1, 129.0, 128.5, 128.5, 128.2, 127.9, 127.9, 127.5, 127.1, 126.5, 126.2, 122.4, 119.3, 93.8, 21.9, 12.9. HRMS (ESI)  $m/z$  Calcd. for  $\text{C}_{40}\text{H}_{30}\text{N}_3\text{O}_3\text{S}$  ( $[\text{M}+\text{H}]^+$ ) 632.2002, Found 632.1994. Enantiomeric excess was determined to be 99% (determined by HPLC using chiral AD-H column, hexane/2-propanol = 7/3,  $\lambda = 254$  nm, 30 °C, 0.8 mL/min,  $t_{\text{major}} = 21.2$  min,  $t_{\text{minor}} = 7.8$  min).

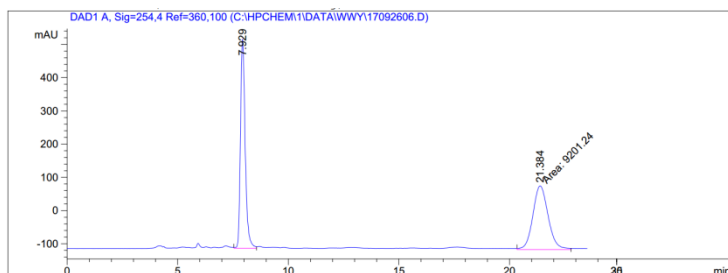

| Peak # | RetTime [min] | Type | Width [min] | Area [mAU*s] | Height [mAU] | Area %  |
|--------|---------------|------|-------------|--------------|--------------|---------|
| 1      | 7.929         | VV   | 0.2266      | 9304.52637   | 629.06079    | 50.2791 |
| 2      | 21.384        | MM   | 0.7996      | 9201.23633   | 191.78377    | 49.7209 |

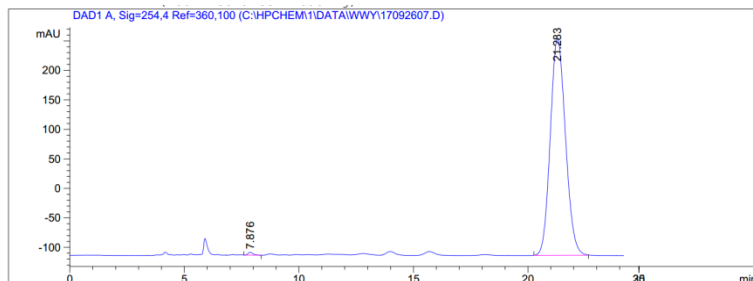

| Peak # | RetTime [min] | Type | Width [min] | Area [mAU*s] | Height [mAU] | Area %  |
|--------|---------------|------|-------------|--------------|--------------|---------|
| 1      | 7.876         | BB   | 0.2224      | 77.55614     | 5.01633      | 0.4563  |
| 2      | 21.283        | BB   | 0.7050      | 1.69197e4    | 367.60971    | 99.5437 |

### Compound 4ga

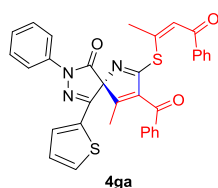

Prepared according to the procedure within 0.5 h as colorless oil (80.0 mg, 69% yield);  $[\alpha]_D^{16} = -128.88$  (*c* 0.36,  $\text{CH}_2\text{Cl}_2$ );  $^1\text{H NMR}$  (400 MHz, Chloroform-*d*)  $\delta$  8.03-7.93 (m, 4H), 7.85 (d, *J* = 6.9 Hz, 2H), 7.70-7.61 (m, 2H), 7.52 (t, *J* = 7.7 Hz, 2H), 7.49-7.44 (m, 4H), 7.33 (t, *J* = 7.7 Hz, 2H), 7.30-7.23 (m, 1H), 7.13-7.07 (m, 1H), 7.09-7.02 (m, 1H), 2.53 (s, 3H), 1.88 (s, 3H);  $^{13}\text{C NMR}$  (101 MHz, Chloroform-*d*)  $\delta$  190.5, 189.3, 175.6, 164.9, 161.5, 149.9, 147.9, 140.2, 138.2, 137.5, 136.4, 134.6, 132.9, 132.5, 129.8, 129.8, 129.2, 129.1, 128.6, 128.5, 128.3, 128.3, 128.2, 126.1, 119.2, 93.6, 21.9, 12.9. HRMS (ESI) *m/z* Calcd. for  $\text{C}_{34}\text{H}_{26}\text{N}_3\text{O}_3\text{S}_2$  ( $[\text{M}+\text{H}]^+$ ) 588.1410, Found 588.1406. Enantiomeric excess was determined to be 77% (determined by HPLC using chiral AD-H column, hexane/2-propanol = 7/3,  $\lambda$  = 254 nm, 30 °C, 0.8 mL/min, *t*<sub>major</sub> = 16.9 min, *t*<sub>minor</sub> = 6.8 min).

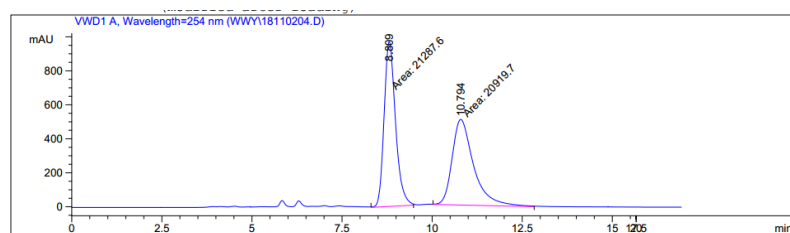

| Peak # | RetTime [min] | Type | Width [min] | Area mAU *s | Height [mAU] | Area %  |
|--------|---------------|------|-------------|-------------|--------------|---------|
| 1      | 8.809         | MM   | 0.3658      | 2.12876e4   | 969.81360    | 50.4359 |
| 2      | 10.794        | MM   | 0.6914      | 2.09197e4   | 504.28552    | 49.5641 |

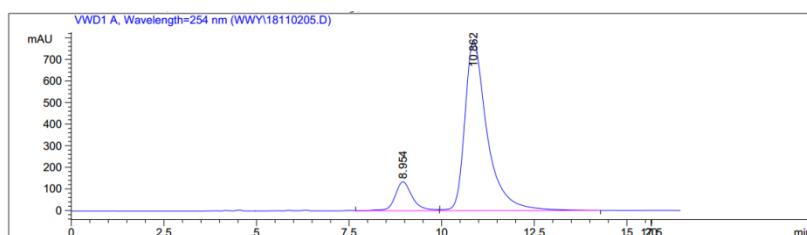

| Peak # | RetTime [min] | Type | Width [min] | Area mAU *s | Height [mAU] | Area %  |
|--------|---------------|------|-------------|-------------|--------------|---------|
| 1      | 8.954         | VB   | 0.4925      | 4403.88330  | 134.04524    | 11.7893 |
| 2      | 10.862        | BB   | 0.6214      | 3.29512e4   | 786.29016    | 88.2107 |

### Compound 4ha

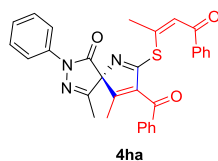

Prepared according to the procedure within 0.5 h as colorless oil (41.5 mg, 40% yield);  $[\alpha]_D^{17} = -201.96$  (*c* 0.21,  $\text{CH}_2\text{Cl}_2$ );  $^1\text{H NMR}$  (400 MHz, Chloroform-*d*)  $\delta$  7.96-7.87 (m, 6H), 7.70-7.61 (m, 2H), 7.52 (td, *J* = 7.7, 5.7 Hz, 3H), 7.42 (dt, *J* = 15.2, 7.3 Hz, 4H), 7.25 (s, *J* = 7.3 Hz 1H), 2.55 (d, *J* = 1.3 Hz, 3H), 1.99 (s, 3H), 1.87 (s, 3H);  $^{13}\text{C NMR}$  (101 MHz, Chloroform-*d*)  $\delta$  190.5, 189.3, 175.3, 165.6, 159.4, 156.2, 148.1, 140.6, 138.2, 137.6, 136.4, 134.6, 132.9, 129.7, 129.1, 129.0, 128.6, 128.5, 128.3, 125.8, 118.9, 94.5, 21.8, 14.3, 12.6. HRMS (ESI) *m/z* Calcd. for  $\text{C}_{31}\text{H}_{26}\text{N}_3\text{O}_3\text{S}$  ( $[\text{M}+\text{H}]^+$ ) 520.1689, Found 520.1681. Enantiomeric excess was determined to be 97% (determined by HPLC using chiral AD-H column, hexane/2-propanol = 7/3,  $\lambda$  = 254 nm, 30 °C, 0.8 mL/min, *t*<sub>major</sub> = 10.9 min, *t*<sub>minor</sub> = 8.2 min).

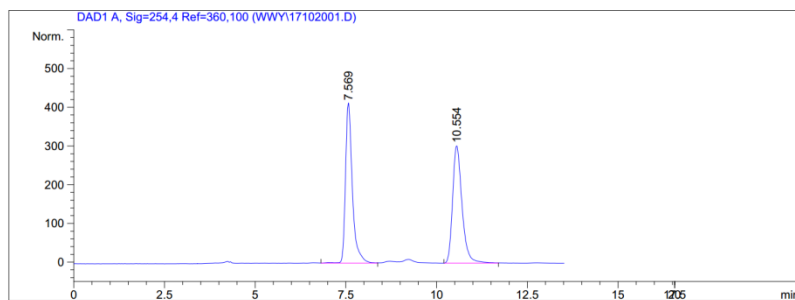

| Peak # | RetTime [min] | Type | Width [min] | Area [mAU*s] | Height [mAU] | Area %  |
|--------|---------------|------|-------------|--------------|--------------|---------|
| 1      | 7.569         | VB   | 0.2032      | 5490.86328   | 412.85352    | 50.0525 |
| 2      | 10.554        | BB   | 0.2750      | 5479.33984   | 302.98309    | 49.9475 |

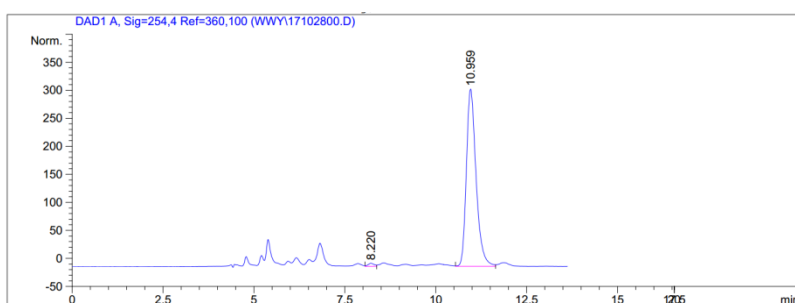

| Peak # | RetTime [min] | Type | Width [min] | Area [mAU*s] | Height [mAU] | Area %  |
|--------|---------------|------|-------------|--------------|--------------|---------|
| 1      | 8.220         | VV   | 0.1822      | 69.04163     | 5.66425      | 1.1647  |
| 2      | 10.959        | VV   | 0.2841      | 5858.82324   | 316.29837    | 98.8353 |

### Compound 4ia

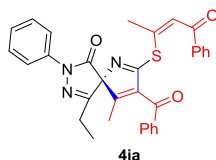

Prepared according to the procedure within 0.5 h as colorless oil (86.3 mg, 81% yield);  $[\alpha]_D^{18} = -194.75$  (*c* 0.46,  $\text{CH}_2\text{Cl}_2$ );  $^1\text{H}$  NMR (400 MHz, Chloroform-*d*)  $\delta$  7.97-7.88 (m, 6H), 7.70-7.61 (m, 2H), 7.56-7.48 (m, 3H), 7.48-7.37 (m, 4H), 7.12 (t, *J* = 10.9 Hz, 1H), 2.54 (s, 3H), 2.40-2.18 (m, 2H), 1.87 (s, 3H), 1.25 (t, *J* = 7.4 Hz, 3H).  $^{13}\text{C}$  NMR (101 MHz, Chloroform-*d*)  $\delta$  190.5, 189.3, 175.1, 165.7, 160.3, 159.8, 148.2, 140.5, 138.3, 137.7, 136.4, 134.5, 132.9, 129.7, 129.1, 129.0, 128.6, 128.5, 128.1, 125.7, 118.9, 94.6, 22.5, 21.8, 12.7, 9.7. HRMS (ESI) *m/z* Calcd. for  $\text{C}_{25}\text{H}_{17}\text{N}_3\text{O}_2\text{S}$  ( $[\text{M}+\text{H}]^+$ ) 534.1846, Found 534.1837. Enantiomeric excess was determined to be 92% (determined by HPLC using chiral AD-H column, hexane/2-propanol = 7/3,  $\lambda$  = 254 nm, 30 °C, 0.8 mL/min, *t*<sub>major</sub> = 9.3 min, *t*<sub>minor</sub> = 6.7 min).

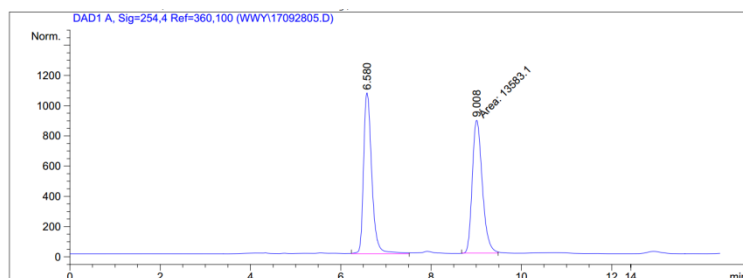



| Peak # | RetTime [min] | Type | Width [min] | Area [mAU*s] | Height [mAU] | Area %  |
|--------|---------------|------|-------------|--------------|--------------|---------|
| 1      | 6.580         | BB   | 0.1939      | 1.34967e4    | 1064.62646   | 49.8404 |
| 2      | 9.008         | MM   | 0.2574      | 1.35831e4    | 879.51312    | 50.1596 |

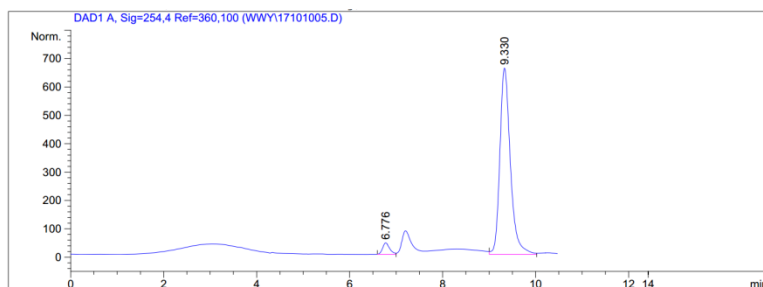

| Peak # | RetTime [min] | Type | Width [min] | Area [mAU*s] | Height [mAU] | Area %  |
|--------|---------------|------|-------------|--------------|--------------|---------|
| 1      | 6.776         | BV   | 0.1592      | 416.90558    | 40.13433     | 3.9015  |
| 2      | 9.330         | VV   | 0.2365      | 1.02687e4    | 656.35687    | 96.0985 |

### Compound 4ja

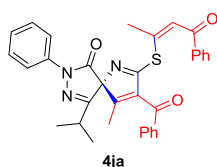

Prepared according to the procedure within 0.5 h as colorless oil (76.6 mg, 70% yield);  $[\alpha]_D^{16} = -189.12$  ( $c$  0.36,  $\text{CH}_2\text{Cl}_2$ );  $^1\text{H NMR}$  (400 MHz, Chloroform- $d$ )  $\delta$  7.93 (m, 6H), 7.68-7.62 (m, 2H), 7.56-7.49 (m, 3H), 7.47-7.38 (m, 4H), 7.23 (t,  $J = 7.4$  Hz, 1H), 2.54 (m, 1H), 2.53 (d,  $J = 1.3$  Hz, 3H), 1.25 (d,  $J = 6.8$  Hz, 3H), 1.22 (d,  $J = 7.0$  Hz, 3H).  $^{13}\text{C NMR}$  (101 MHz, Chloroform- $d$ )  $\delta$  190.7, 189.4, 174.8, 165.7, 163.7, 160.3, 148.2, 140.3, 138.2, 137.8, 136.4, 134.5, 132.9, 129.7, 129.1, 129.0, 128.6, 128.5, 128.1, 118.9, 94.8, 30.2, 21.9, 20.2 (d,  $J = 11.2$  Hz), 12.78. HRMS (ESI)  $m/z$  Calcd. for  $\text{C}_{33}\text{H}_{30}\text{N}_3\text{O}_3\text{S}$  ( $[\text{M}+\text{H}]^+$ ) 548.2002, Found 548.1994. Enantiomeric excess was determined to be 89% (determined by HPLC using chiral AD-H column, hexane/2-propanol = 7/3,  $\lambda = 254$  nm, 30 °C, 0.8 mL/min,  $t_{\text{major}} = 8.3$  min,  $t_{\text{minor}} = 5.7$  min).

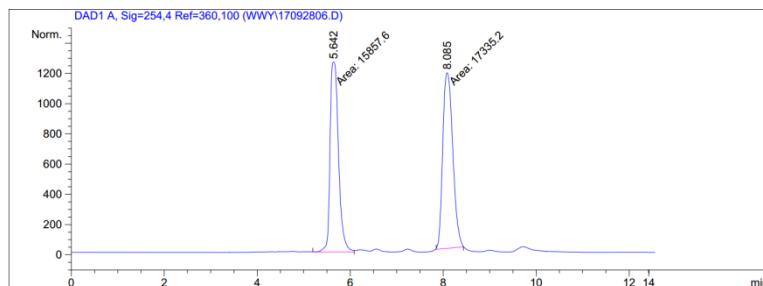

| Peak # | RetTime [min] | Type | Width [min] | Area [mAU*s] | Height [mAU] | Area %  |
|--------|---------------|------|-------------|--------------|--------------|---------|
| 1      | 5.642         | MM   | 0.2102      | 1.58576e4    | 1257.60742   | 47.7741 |
| 2      | 8.085         | MM   | 0.2486      | 1.73352e4    | 1162.07275   | 52.2259 |

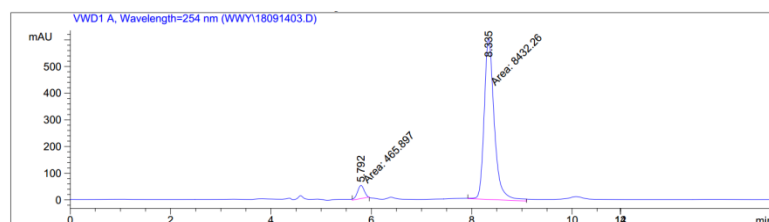

| Peak # | RT [min] | Type | Width [min] | Area     | Area % | Name |
|--------|----------|------|-------------|----------|--------|------|
| 1      | 5.792    | MM   | 0.160       | 483.710  | 5.431  |      |
| 2      | 8.335    | BB   | 0.211       | 8422.038 | 94.569 |      |

### Compound 4ka

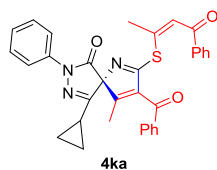

Prepared according to the procedure within 0.5 h as colorless oil (65.4 mg, 60% yield);  $[\alpha]_D^{15} = -197.55$  (*c* 0.32, CH<sub>2</sub>Cl<sub>2</sub>); <sup>1</sup>H NMR (400 MHz, Chloroform-*d*)  $\delta$  7.98-7.85 (m, 6H), 7.70-7.60 (m, 2H), 7.56-7.46 (m, 3H), 7.42 (t, *J* = 8.0 Hz, 4H), 7.21 (d, *J* = 7.4 Hz, 1H), 2.55 (s, 3H), 1.90 (s, 3H), 1.38 (tt, *J* = 8.5, 5.0 Hz, 1H), 1.15-1.05 (m, 2H), 0.98 (dd, *J* = 8.2, 3.2 Hz, 2H); <sup>13</sup>C NMR (101 MHz, Chloroform-*d*)  $\delta$  190.6, 189.4, 175.1, 165.4, 161.1, 160.2, 148.4, 142.6, 140.4, 138.2, 137.7, 136.4, 134.6, 132.9, 129.7, 129.1, 129.0, 128.6, 128.6, 128.5, 128.1, 127.9, 125.8, 125.7, 118.9, 94.7, 80.8, 29.5, 21.9, 12.8, 9.8, 8.5. HRMS (ESI) *m/z* Calcd. for C<sub>33</sub>H<sub>28</sub>N<sub>3</sub>O<sub>3</sub>S ([M+H]<sup>+</sup>) 546.1846, Found 546.1842. Enantiomeric excess was determined to be 95% (determined by HPLC using chiral AD-H column, hexane/2-propanol = 7/3,  $\lambda$  = 254 nm, 30 °C, 0.8 mL/min, *t*<sub>major</sub> = 11.7 min, *t*<sub>minor</sub> = 7.2 min).

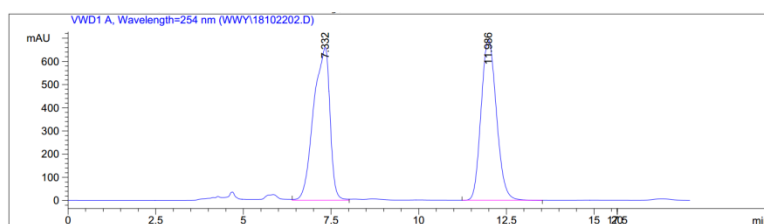

| # | Time   | Area    | Height | Width  | Area%  | Symmetry |
|---|--------|---------|--------|--------|--------|----------|
| 1 | 7.332  | 21270.5 | 658.8  | 0.4364 | 50.253 | 2.237    |
| 2 | 11.986 | 21056.2 | 691    | 0.4807 | 49.747 | 0.652    |

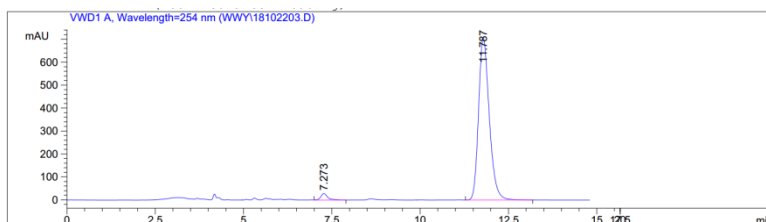

| # | Time   | Area    | Height | Width  | Area%  | Symmetry |
|---|--------|---------|--------|--------|--------|----------|
| 1 | 7.273  | 385     | 28.6   | 0.2009 | 2.522  | 0.725    |
| 2 | 11.787 | 14880.4 | 706.9  | 0.3228 | 97.478 | 0.733    |

### Compound 4ab

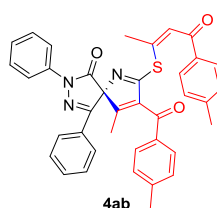

Prepared according to the procedure within 0.5 h as colorless oil (81.6 mg, 67% yield);  $[\alpha]_D^{16} = -156.00$  (*c* 0.41, CH<sub>2</sub>Cl<sub>2</sub>); <sup>1</sup>H NMR (400 MHz, Chloroform-*d*)  $\delta$  8.02 (d, *J* = 8.5 Hz, 2H), 7.88 (d, *J* = 8.2 Hz, 2H), 7.74 (d, *J* = 8.2 Hz, 2H), 7.61 (d, *J* = 1.5 Hz, 1H), 7.60-7.55 (m, 2H), 7.48 (dd, *J* = 8.6, 7.3 Hz, 2H), 7.45-7.39 (m, 3H), 7.31 (d, *J* = 8.1 Hz, 3H), 7.10 (d, *J* = 8.0 Hz, 2H), 2.50 (d, *J* = 1.3 Hz, 3H), 2.44 (s, 3H), 2.33 (s, 3H), 1.86 (s, 3H); <sup>13</sup>C NMR (101 MHz, Chloroform-*d*)  $\delta$  190.2, 189.0, 175.4, 165.3, 161.4, 153.9, 147.5, 145.8, 143.6, 140.6, 137.7, 135.7, 134.0, 131.5, 129.9, 129.8, 129.2, 129.2, 129.1, 128.6, 128.4, 126.1, 125.9, 119.2, 93.7, 21.9, 21.8, 21.6, 12.8. HRMS (ESI) *m/z* Calcd. for C<sub>38</sub>H<sub>32</sub>N<sub>3</sub>O<sub>3</sub>S ([M+H]<sup>+</sup>) 610.2159, Found 610.2148. Enantiomeric excess was determined to be 98% (determined by HPLC using chiral AD-H column, hexane/2-propanol = 7/3,  $\lambda$  = 254 nm, 30 °C, 0.8 mL/min, *t*<sub>major</sub> = 12.1 min, *t*<sub>minor</sub> = 7.9 min).

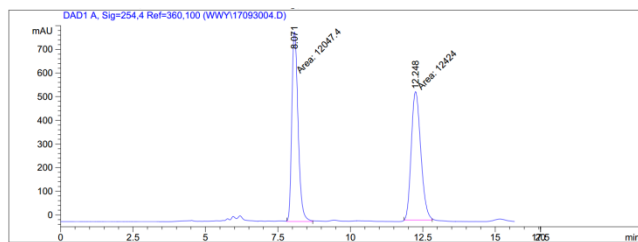

| Peak # | RetTime [min] | Type | Width [min] | Area [mAU*s] | Height [mAU] | Area %  |
|--------|---------------|------|-------------|--------------|--------------|---------|
| 1      | 8.071         | MM   | 0.2505      | 1.20474e4    | 801.59412    | 49.2305 |
| 2      | 12.248        | MM   | 0.3812      | 1.24240e4    | 543.19574    | 50.7695 |

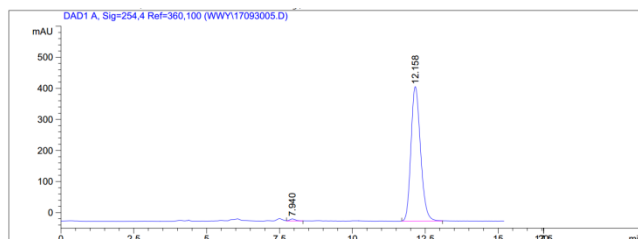

| Peak # | RetTime [min] | Type | Width [min] | Area [mAU*s] | Height [mAU] | Area %  |
|--------|---------------|------|-------------|--------------|--------------|---------|
| 1      | 7.940         | VB   | 0.2070      | 91.05917     | 6.59800      | 0.9126  |
| 2      | 12.158        | BB   | 0.3564      | 9887.28809   | 432.93488    | 99.0874 |

### Compound 4ac

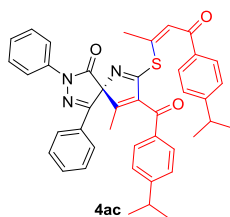

Prepared according to the procedure within 0.5 h as colorless oil (79.8 mg, 60% yield);  $[\alpha]_D^{15} = -187.00$  ( $c$  0.41,  $\text{CH}_2\text{Cl}_2$ );  $^1\text{H NMR}$  (400 MHz, Chloroform- $d$ )  $\delta$  8.04 (d,  $J = 7.5$  Hz, 2H), 7.93 (d,  $J = 8.4$  Hz, 2H), 7.78 (d,  $J = 8.4$  Hz, 2H), 7.65 (d,  $J = 1.4$  Hz, 1H), 7.59 (dd,  $J = 8.0, 1.7$  Hz, 2H), 7.51-7.40 (m, 5H), 7.36 (d,  $J = 8.3$  Hz, 2H), 7.29 (t,  $J = 7.4$  Hz, 1H), 7.15 (d,  $J = 8.3$  Hz, 2H), 2.98 (m, 1H), 2.87 (m, 1H), 2.50 (d,  $J = 1.2$  Hz, 3H), 1.87 (s, 3H), 1.27 (d,  $J = 6.9$  Hz, 6H), 1.21 (d,  $J = 0.9$  Hz, 6H);  $^{13}\text{C NMR}$  (101 MHz, Chloroform- $d$ )  $\delta$  190.2, 189.0, 175.4, 165.3, 161.1, 156.4, 154.3, 153.9, 147.3, 140.7, 137.8, 136.1, 134.2, 131.5, 130.2, 130.0, 129.2, 129.1, 128.8, 128.3, 127.3, 126.6, 126.1, 125.9, 119.2, 93.7, 34.4, 34.2, 23.7, 23.6, 23.6, 21.8, 12.8. HRMS (ESI)  $m/z$  Calcd. for  $\text{C}_{42}\text{H}_{40}\text{N}_3\text{O}_3\text{S}$  ( $[\text{M}+\text{H}]^+$ ) 666.2785, Found 666.2774. Enantiomeric excess was determined to be 96% (determined by HPLC using chiral AD-H column, hexane/2-propanol = 7/3,  $\lambda = 254$  nm, 30 °C, 0.8 mL/min,  $t_{\text{major}} = 9.2$  min,  $t_{\text{minor}} = 8.0$  min).

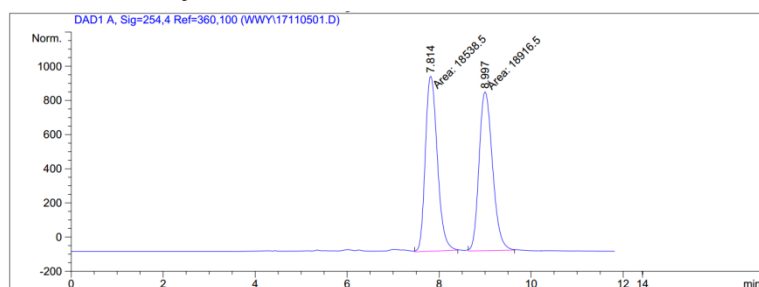

| Peak # | RetTime [min] | Type | Width [min] | Area [mAU*s] | Height [mAU] | Area %  |
|--------|---------------|------|-------------|--------------|--------------|---------|
| 1      | 7.814         | MM   | 0.3017      | 1.85385e4    | 1024.08740   | 49.4953 |
| 2      | 8.997         | MM   | 0.3393      | 1.89165e4    | 929.23755    | 50.5047 |

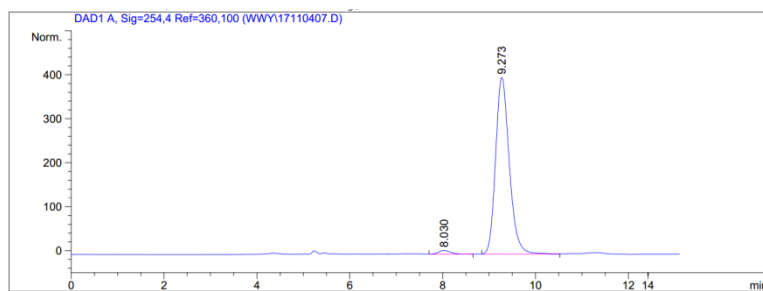

| Peak # | RetTime [min] | Type | Width [min] | Area [mAU*s] | Height [mAU] | Area %  |
|--------|---------------|------|-------------|--------------|--------------|---------|
| 1      | 8.030         | VB   | 0.3006      | 172.08455    | 8.78162      | 2.0413  |
| 2      | 9.273         | BB   | 0.3156      | 8258.23047   | 402.08234    | 97.9587 |

### Compound 4ad

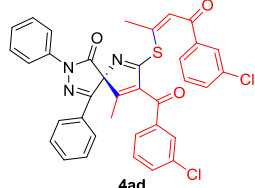

Prepared according to the procedure within 0.5 h as colorless oil (65.0 mg, 50% yield);  $[\alpha]_D^{15} = -201.66$  (*c* 0.34,  $\text{CH}_2\text{Cl}_2$ );  $^1\text{H NMR}$  (400 MHz, Chloroform-*d*)  $\delta$  8.02 (d, *J* = 8.1 Hz, 2H), 7.95 (s, 1H), 7.86 (s, 1H), 7.83 (d, *J* = 7.8 Hz, 1H), 7.70 (d, *J* = 7.8 Hz, 1H), 7.65 (s, 1H), 7.62 (d, *J* = 8.0 Hz, 1H), 7.55 (d, *J* = 6.9 Hz, 2H), 7.53-7.39 (m, 7H), 7.29 (t, *J* = 7.5 Hz, 1H), 7.23 (d, *J* = 7.9 Hz, 1H), 2.50 (s, 3H), 1.88 (s, 3H);  $^{13}\text{C NMR}$  (101 MHz, Chloroform-*d*)  $\delta$  189.2, 187.8, 174.5, 164.8, 163.0, 153.7, 149.4, 139.9, 139.8, 137.9, 137.6, 135.6, 134.9, 134.4, 132.7, 131.6, 130.5, 129.9, 129.8, 129.2, 129.1, 128.6, 128.2, 126.9, 126.5, 126.2, 125.9, 119.2, 93.9, 21.9, 12.9. HRMS (ESI) *m/z* Calcd. for  $\text{C}_{25}\text{H}_{17}\text{N}_3\text{O}_2\text{S}$  ( $[\text{M}+\text{H}]^+$ ) 650.1066, Found 650.1063. Enantiomeric excess was determined to be 92% (determined by HPLC using chiral AD-H column, hexane/2-propanol = 7/3,  $\lambda = 254$  nm, 30 °C, 0.8 mL/min,  $t_{\text{major}} = 15.0$  min,  $t_{\text{minor}} = 7.1$  min).

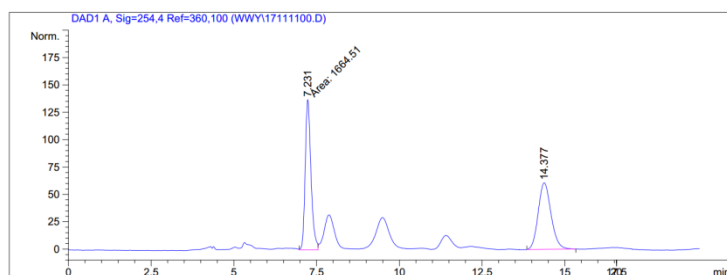

| Peak # | RetTime [min] | Type | Width [min] | Area [mAU*s] | Height [mAU] | Area %  |
|--------|---------------|------|-------------|--------------|--------------|---------|
| 1      | 7.231         | MM   | 0.2018      | 1664.51355   | 137.50322    | 50.4197 |
| 2      | 14.377        | PP   | 0.4184      | 1636.80530   | 60.74264     | 49.5803 |

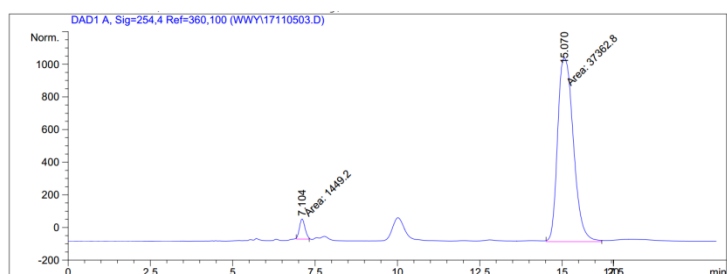

| Peak # | RetTime [min] | Type | Width [min] | Area [mAU*s] | Height [mAU] | Area %  |
|--------|---------------|------|-------------|--------------|--------------|---------|
| 1      | 7.104         | MM   | 0.1963      | 1449.19983   | 123.06200    | 3.7339  |
| 2      | 15.070        | MM   | 0.5525      | 3.73628e4    | 1127.04346   | 96.2661 |

### Compound 4ae

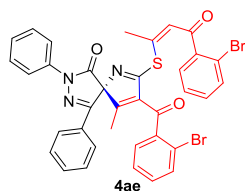

Prepared according to the procedure within 0.5 h as colorless oil (91.6 mg, 62% yield);  $[\alpha]_D^{17} = -55.50$  ( $c$  0.36,  $\text{CH}_2\text{Cl}_2$ );  $^1\text{H NMR}$  (400 MHz, Chloroform- $d$ )  $\delta$  7.95 (d,  $J = 7.6$  Hz, 2H), 7.62 (d,  $J = 1.1$  Hz, 1H), 7.55-7.50 (m, 3H), 7.48-7.47 (m, 1H), 7.46-7.41 (m, 4H), 7.40-7.34 (m, 4H), 7.29-7.26 (m, 2H), 7.25-7.21 (m, 2H), 2.58 (d,  $J = 1.3$  Hz, 3H), 1.72 (s, 3H);  $^{13}\text{C NMR}$  (101 MHz, Chloroform- $d$ )  $\delta$  191.1, 190.1, 175.3, 167.4, 164.7, 153.6, 150.5, 141.4, 139.8, 139.1, 137.6, 133.7, 132.8, 131.8, 131.5, 130.7, 129.8, 129.8, 129.8, 129.1, 129.0, 128.1, 127.4, 126.1, 126.1, 119.7, 119.7, 119.2, 94.1, 22.2, 12.7. HRMS (ESI)  $m/z$  Calcd. for  $\text{C}_{36}\text{H}_{26}\text{N}_3\text{O}_3\text{SBr}_2$  ( $[\text{M}+\text{H}]^+$ ) 740.0036, Found 740.0022. Enantiomeric excess was determined to be 92% (determined by HPLC using chiral AD-H column, hexane/2-propanol = 7/3,  $\lambda = 254$  nm, 30 °C, 0.8 mL/min,  $t_{\text{major}} = 44.7$  min,  $t_{\text{minor}} = 55.9$  min).

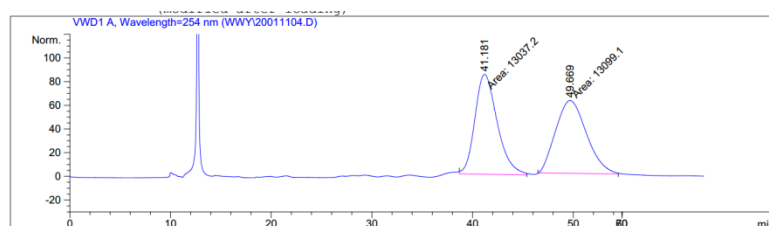

| Peak # | RetTime [min] | Type | Width [min] | Area mAU *s | Height [mAU] | Area %  |
|--------|---------------|------|-------------|-------------|--------------|---------|
| 1      | 41.181        | MM   | 2.5737      | 1.30372e4   | 84.42672     | 49.8815 |
| 2      | 49.669        | MM   | 3.5515      | 1.30991e4   | 61.47183     | 50.1185 |

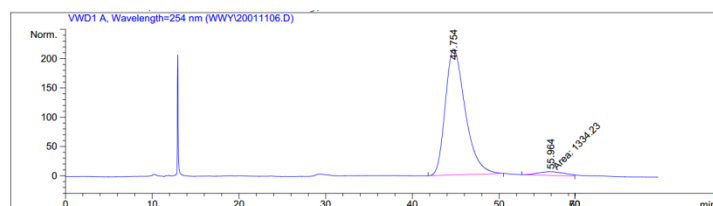

| Peak # | RetTime [min] | Type | Width [min] | Area mAU *s | Height [mAU] | Area %  |
|--------|---------------|------|-------------|-------------|--------------|---------|
| 1      | 44.754        | BB   | 2.3936      | 3.43049e4   | 214.59309    | 96.2563 |
| 2      | 55.964        | MM   | 3.7402      | 1334.23132  | 5.94549      | 3.7437  |

### Compound 4af

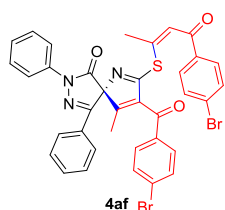

Prepared according to the procedure within 0.5 h as colorless oil (104.5 mg, 71% yield);  $[\alpha]_D^{17} = -95.75$  ( $c$  0.32,  $\text{CH}_2\text{Cl}_2$ );  $^1\text{H NMR}$  (400 MHz, Chloroform- $d$ )  $\delta$  8.01 (dd,  $J = 8.7, 1.2$  Hz, 2H), 7.83 (d,  $J = 8.6$  Hz, 2H), 7.69-7.64 (m, 4H), 7.62 (d,  $J = 1.3$  Hz, 1H), 7.57-7.53 (m, 2H), 7.53-7.47 (m, 3H), 7.46-7.39 (m, 4H), 7.34-7.29 (m, 1H), 2.49 (d,  $J = 1.3$  Hz, 3H), 1.88 (s, 3H);  $^{13}\text{C NMR}$  (101 MHz, Chloroform- $d$ )  $\delta$  189.5, 188.0, 174.7, 164.9, 162.5, 153.8, 149.1, 140.0, 137.6, 137.0, 135.1, 132.5, 131.8, 131.6, 131.2, 130.2, 129.9, 129.8, 129.3, 129.2, 127.9, 126.8, 126.3, 125.9, 119.2, 93.9, 21.9, 12.9. HRMS (ESI)  $m/z$  Calcd. for  $\text{C}_{36}\text{H}_{26}\text{N}_3\text{O}_3\text{SBr}_2$  ( $[\text{M}+\text{H}]^+$ ) 740.0036, Found 740.0030. Enantiomeric excess was determined to be 99% (determined by HPLC using chiral AD-H column, hexane/2-propanol = 7/3,  $\lambda = 254$  nm, 30 °C, 0.8 mL/min,  $t_{\text{major}} = 17.8$  min,  $t_{\text{minor}} = 8.5$  min).

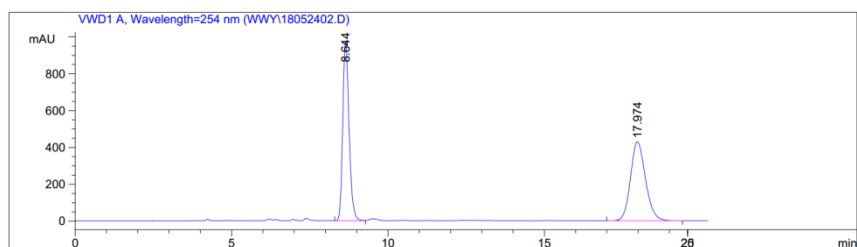

| Peak # | RT [min] | Type | Width [min] | Area      | Area % | Name |
|--------|----------|------|-------------|-----------|--------|------|
| 1      | 8.644    | VV   | 0.214       | 13632.051 | 48.865 |      |
| 2      | 17.974   | BB   | 0.512       | 14265.233 | 51.135 |      |

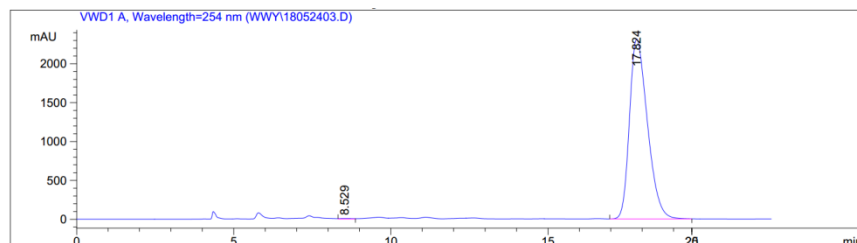

| Peak # | RT [min] | Type | Width [min] | Area      | Area % | Name |
|--------|----------|------|-------------|-----------|--------|------|
| 1      | 8.529    | VV   | 0.391       | 191.482   | 0.208  |      |
| 2      | 17.824   | VB   | 0.612       | 91824.516 | 99.792 |      |

### Compound 4ag

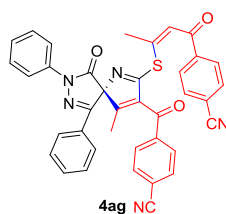

Prepared according to the procedure within 0.5 h as colorless oil (95.9 mg, 76% yield);  $[\alpha]_D^{21} = -164.84$  ( $c$  0.36,  $\text{CH}_2\text{Cl}_2$ );  $^1\text{H NMR}$  (400 MHz, Chloroform- $d$ )  $\delta$  8.09 (d,  $J = 8.4$  Hz, 2H), 8.03 (d,  $J = 7.5$  Hz, 2H), 7.87 (t,  $J = 8.8$  Hz, 4H), 7.82-7.75 (m, 2H), 7.60-7.52 (m, 5H), 7.48-7.45 (m, 2H), 7.41-7.34 (m, 2H), 2.53 (d,  $J = 1.3$  Hz, 3H), 1.92 (s, 3H);  $^{13}\text{C NMR}$  (101 MHz, Chloroform- $d$ )  $\delta$  189.2, 187.4, 174.0, 164.7, 164.1, 153.6, 150.8, 141.4, 139.5, 139.3, 137.4, 132.9, 132.4, 132.36, 131.8, 130.0, 129.7, 129.3, 129.3, 128.9, 128.7, 126.6, 125.8, 125.5, 119.2, 117.7, 115.9, 94.1, 22.1, 13.1. HRMS (ESI)  $m/z$  Calcd. for  $\text{C}_{38}\text{H}_{26}\text{N}_5\text{O}_3\text{S}$  ( $[\text{M}+\text{H}]^+$ ) 632.1751, Found 632.1753. Enantiomeric excess was determined to be 92% (determined by HPLC using chiral AD-H column, hexane/2-propanol = 7/3,  $\lambda = 254$  nm, 30 °C, 0.8 mL/min,  $t_{\text{major}} = 40.7$  min,  $t_{\text{minor}} = 16.9$  min).

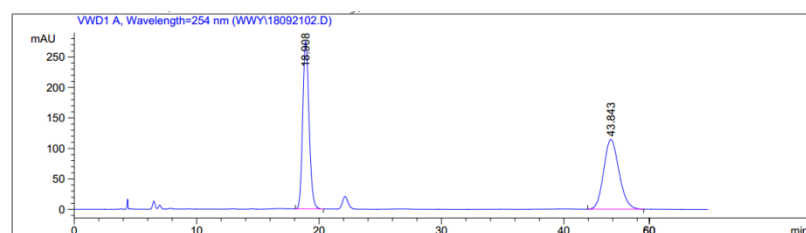

| Peak # | RT [min] | Type | Width [min] | Area     | Area % | Name |
|--------|----------|------|-------------|----------|--------|------|
| 1      | 18.908   | PB   | 0.562       | 9883.434 | 49.766 |      |
| 2      | 43.843   | BB   | 1.341       | 9976.386 | 50.234 |      |

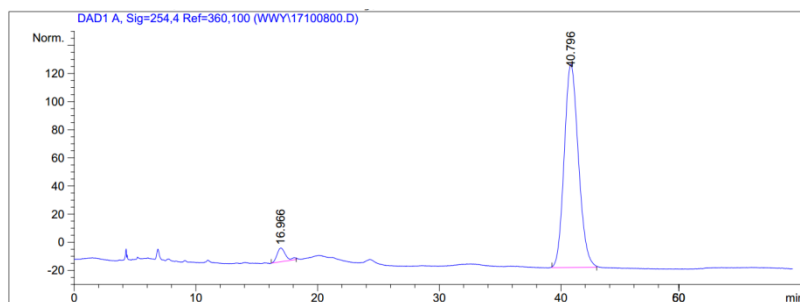

| Peak # | RetTime [min] | Type | Width [min] | Area [mAU*s] | Height [mAU] | Area %  |
|--------|---------------|------|-------------|--------------|--------------|---------|
| 1      | 16.966        | PB   | 0.5903      | 475.43219    | 9.76063      | 3.9087  |
| 2      | 40.796        | BB   | 1.1801      | 1.16881e4    | 144.44043    | 96.0913 |

### Compound 4ah

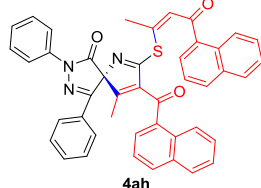

Prepared according to the procedure within 0.5 h as colorless oil (95.3 mg, 70% yield);  $[\alpha]_D^{15} = -90.25$  (*c* 0.32, CH<sub>2</sub>Cl<sub>2</sub>); <sup>1</sup>H NMR (400 MHz, Chloroform-*d*) δ 8.71 (dd, *J* = 8.6, 1.1 Hz, 1H), 8.56-8.44 (m, 1H), 8.07 (d, *J* = 8.2 Hz, 1H), 7.99 (dd, *J* = 8.7, 1.2 Hz, 2H), 7.96 (dd, *J* = 7.2, 1.2 Hz, 1H), 7.92-7.87 (m, 2H), 7.83-7.80 (m, 1H), 7.77 (dd, *J* = 7.2, 1.2 Hz, 1H), 7.66 (ddd, *J* = 8.5, 6.9, 1.5 Hz, 1H), 7.57 (dd, *J* = 6.8, 1.6 Hz, 2H), 7.54-7.49 (m, 3H), 7.48-7.38 (m, 8H), 7.31-7.26 (m, 2H), 2.56 (d, *J* = 1.3 Hz, 3H), 1.75 (s, 3H); <sup>13</sup>C NMR (101 MHz, Chloroform-*d*) δ 192.7, 191.8, 175.8, 165.1, 164.3, 153.9, 148.3, 141.4, 137.7, 136.7, 134.4, 134.1, 133.9, 133.8, 132.5, 132.3, 131.5, 131.4, 130.3, 130.2, 130.0, 129.2, 129.1, 128.7, 128.7, 128.7, 128.4, 127.7, 127.0, 126.4, 126.1, 125.9, 125.7, 125.4, 112.8, 112.5, 119.2, 93.8, 21.9, 12.9. HRMS (ESI) *m/z* Calcd. for C<sub>44</sub>H<sub>32</sub>N<sub>3</sub>O<sub>3</sub>S ([M+H]<sup>+</sup>) 682.2159, Found 682.2137. Enantiomeric excess was determined to be 89% (determined by HPLC using chiral AD-H column, hexane/2-propanol = 7/3, λ = 254 nm, 30 °C, 0.8 mL/min, *t*<sub>major</sub> = 29.8 min, *t*<sub>minor</sub> = 17.8 min).

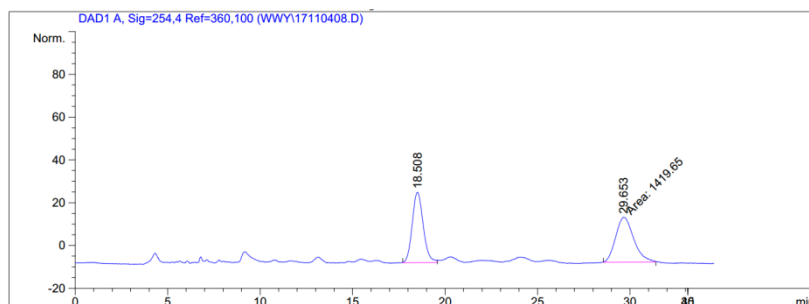

| Peak # | RetTime [min] | Type | Width [min] | Area [mAU*s] | Height [mAU] | Area %  |
|--------|---------------|------|-------------|--------------|--------------|---------|
| 1      | 18.508        | BB   | 0.6434      | 1364.95813   | 32.94386     | 49.0180 |
| 2      | 29.653        | MM   | 1.1268      | 1419.64722   | 20.99841     | 50.9820 |

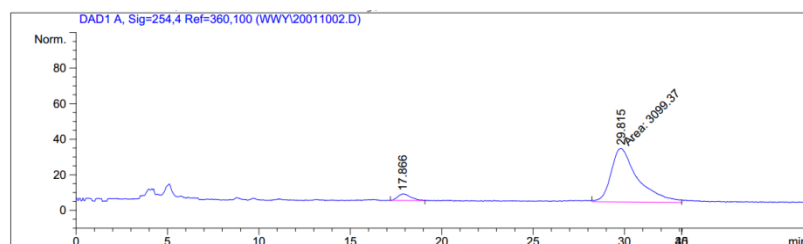

| Peak # | RetTime [min] | Type | Width [min] | Area [mAU*s] | Height [mAU] | Area %  |
|--------|---------------|------|-------------|--------------|--------------|---------|
| 1      | 17.866        | BB   | 0.5936      | 182.09482    | 3.70359      | 5.5492  |
| 2      | 29.815        | MM   | 1.7151      | 3099.36670   | 30.11760     | 94.4508 |

### Compound 4ai

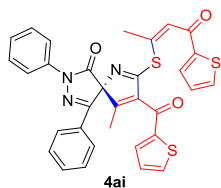

Prepared according to the procedure within 0.5 h as colorless oil (86.6 mg, 73% yield);  $[\alpha]_D^{16} = -112.00$  (*c* 0.44,  $\text{CH}_2\text{Cl}_2$ );  $^1\text{H}$  NMR (400 MHz, Chloroform-*d*)  $\delta$  8.03 (d, *J* = 7.6 Hz, 2H), 7.82 (dd, *J* = 4.9, 1.2 Hz, 1H), 7.78 (dd, *J* = 3.8, 1.2 Hz, 1H), 7.62 (d, *J* = 1.3 Hz, 1H), 7.58 (dd, *J* = 8.1, 1.7 Hz, 2H), 7.55-7.47 (m, 4H), 7.47-7.41 (m, 3H), 7.29 (t, *J* = 7.5 Hz, 1H), 7.16 (dd, *J* = 4.9, 3.9 Hz, 1H), 6.96 (dd, *J* = 4.9, 3.8 Hz, 1H), 2.57 (d, *J* = 1.3 Hz, 3H), 1.98 (s, 3H);  $^{13}\text{C}$  NMR (101 MHz, Chloroform-*d*)  $\delta$  182.0, 181.2, 174.4, 165.1, 161.0, 153.9, 149.0, 146.2, 143.2, 140.5, 137.6, 137.0, 136.7, 133.9, 131.9, 131.6, 129.9, 129.3, 129.1, 128.9, 128.2, 126.3, 126.2, 125.9, 119.2, 93.7, 21.8, 12.9. HRMS (ESI) *m/z* Calcd. for  $\text{C}_{32}\text{H}_{24}\text{N}_3\text{O}_3\text{S}_3$  ( $[\text{M}+\text{H}]^+$ ) 594.0974, Found 594.0964. Enantiomeric excess was determined to be 95% (determined by HPLC using chiral AD-H column, hexane/2-propanol = 7/3,  $\lambda = 254$  nm, 30 °C, 0.8 mL/min, *t*<sub>major</sub> = 101.3 min, *t*<sub>minor</sub> = 9.3 min).

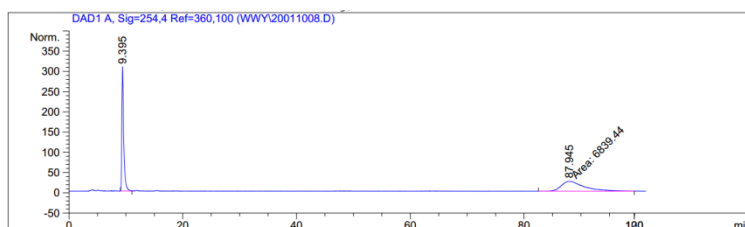

| Peak # | RetTime [min] | Type | Width [min] | Area [mAU*s] | Height [mAU] | Area %  |
|--------|---------------|------|-------------|--------------|--------------|---------|
| 1      | 9.395         | BB   | 0.3237      | 6828.97852   | 306.79050    | 49.9617 |
| 2      | 87.945        | MM   | 4.6935      | 6839.44043   | 24.28675     | 50.0383 |

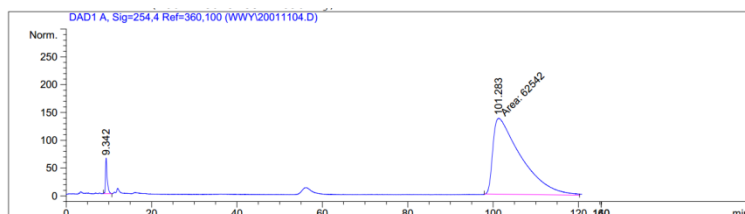

| Peak # | RetTime [min] | Type | Width [min] | Area [mAU*s] | Height [mAU] | Area %  |
|--------|---------------|------|-------------|--------------|--------------|---------|
| 1      | 9.342         | BB   | 0.4029      | 1772.26367   | 64.02471     | 2.7556  |
| 2      | 101.283       | MM   | 7.6301      | 6.25420e4    | 136.61172    | 97.2444 |

### Compound 4aj

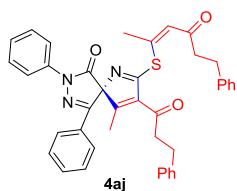

Prepared according to the procedure within 0.5 h as colorless oil (72.6 mg, 57% yield);  $[\alpha]_D^{15} = -32.00$  (*c* 0.14,  $\text{CH}_2\text{Cl}_2$ );  $^1\text{H}$  NMR (400 MHz, Chloroform-*d*)  $\delta$  8.00 (d, *J* = 8.5 Hz, 2H), 7.54 - 7.44 (m, 5H), 7.44 - 7.35 (m, 2H), 7.38 - 7.29 (m, 3H), 7.30 - 7.22 (m, 5H), 7.21 - 7.15 (m, 3H), 6.85 (s, 1H), 3.28 - 3.13 (m, 2H), 3.13 - 3.05 (m, 2H), 2.96 - 2.84 (m, 2H), 2.82 - 2.71 (m, 2H), 2.52 (d, *J* = 1.3 Hz, 3H), 2.17 (s, 3H);  $^{13}\text{C}$  NMR (101 MHz, Chloroform-*d*)  $\delta$  198.1, 195.9, 175.8, 165.2, 164.9, 153.5, 148.5, 141.0, 140.3, 139.8, 137.6, 131.5, 131.1, 130.0, 129.1, 128.7, 128.5, 128.4, 126.5, 126.1, 126.1, 125.8, 119.2, 94.1, 46.1, 45.0, 29.8, 29.6, 21.8, 13.6. HRMS (ESI) *m/z* Calcd. for  $\text{C}_{40}\text{H}_{36}\text{N}_3\text{O}_3\text{S}$  ( $[\text{M}+\text{H}]^+$ ) 638.2472, Found 638.2471. Enantiomeric excess was determined to be 75% (determined by HPLC using chiral AD-H column, hexane/2-propanol = 7/3,  $\lambda = 254$  nm, 30 °C,





## The procedure for the synthesis of compounds 5.

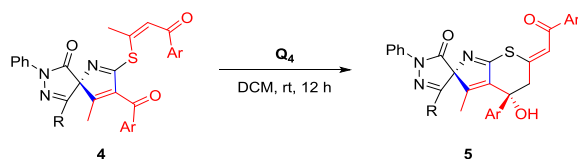

A reaction tube was charged with **4** (0.1 mmol) and DCM (1 mL), then **Q4** (6.3mg, 0.01 mmol, 0.1 eq.) was added at room temperature. After the reaction was stirred for 12 h, the crude product was purified by column chromatography on silica gel to give the product **5**.

### Compound 5aa

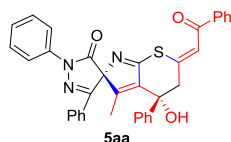

Prepared according to the procedure within 12 h as white solid (51.7 mg, 89% yield, dr > 20:1). mp 155-157 °C;  $[\alpha]_D^{18} = 122.00$  (*c* 0.32, CH<sub>2</sub>Cl<sub>2</sub>); <sup>1</sup>H NMR (400 MHz, Chloroform-*d*) δ 7.95 (d, *J* = 8.1 Hz, 2H), 7.90 (d, *J* = 7.6 Hz, 2H), 7.58 (d, *J* = 7.7 Hz, 2H), 7.48 (d, *J* = 7.6 Hz, 3H), 7.45-7.36 (m, 7H), 7.35-7.27 (m, 4H), 7.13 (s, 1H), 3.55 (d, *J* = 14.5 Hz, 1H), 3.19 (d, *J* = 14.6 Hz, 1H), 2.99 (bs, 1H), 1.38 (s, 3H); <sup>13</sup>C NMR (101 MHz, Chloroform-*d*) δ 188.6, 178.7, 165.8, 156.5, 154.5, 150.5, 142.3, 140.2, 137.7, 137.5, 132.9, 131.2, 130.1, 129.0, 128.7, 128.3, 128.2, 125.9, 125.2, 120.6, 119.3, 93.4, 72.4, 51.5, 12.1. HRMS (ESI) *m/z* Calcd. for C<sub>36</sub>H<sub>28</sub>N<sub>3</sub>O<sub>3</sub>S ([M+H]<sup>+</sup>) 582.1846, Found 582.1841. Enantiomeric excess was determined to be 93% (determined by HPLC using chiral OD-H column, hexane/2-propanol = 7/3, λ = 254 nm, 30 °C, 0.8 mL/min, *t*<sub>major</sub> = 12.6 min, *t*<sub>minor</sub> = 18.0 min).

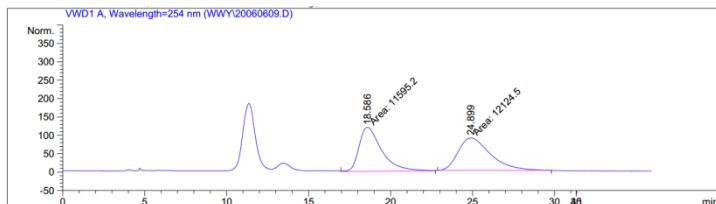

| Peak # | RetTime [min] | Type | Width [min] | Area mAU  | Area *s   | Height [mAU] | Area %  |
|--------|---------------|------|-------------|-----------|-----------|--------------|---------|
| 1      | 18.586        | MM   | 1.6090      | 1.15952e4 | 120.10866 | 48.8842      | 48.8842 |
| 2      | 24.899        | MM   | 2.2865      | 1.21245e4 | 88.37763  | 51.1158      | 51.1158 |

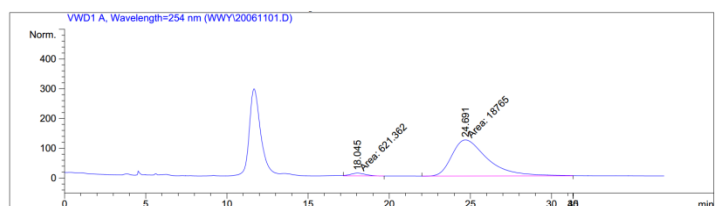

| Peak # | RetTime [min] | Type | Width [min] | Area mAU  | Area *s   | Height [mAU] | Area %  |
|--------|---------------|------|-------------|-----------|-----------|--------------|---------|
| 1      | 18.045        | MM   | 1.0848      | 621.36206 | 9.54624   | 3.2051       | 3.2051  |
| 2      | 24.691        | MM   | 2.5718      | 1.87650e4 | 121.60748 | 96.7949      | 96.7949 |

### Compound 5da

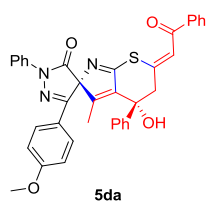

Prepared according to the procedure within 12 h as white solid (55.0 mg, 90% yield, dr = 7.3:1). mp 122.5-125.0 °C;  $[\alpha]_D^{17} = 71.25$  (*c* 0.45, CH<sub>2</sub>Cl<sub>2</sub>); <sup>1</sup>H NMR (600 MHz, Chloroform-*d*: methanol-*d* = 10:1) δ 7.87 (dt, *J* = 25.0, 7.9 Hz, 4H), 7.55 (q, *J* = 7.8, 6.6 Hz, 3H), 7.46 (q, *J* = 7.5 Hz, 2H), 7.40 (p, *J* = 7.5 Hz, 4H), 7.36-7.27 (m, 4H), 7.23 (t, *J* = 7.8 Hz, 1H), 7.14 (d, *J* = 7.2 Hz, 1H), 3.52 (dd, *J* = 14.7, 7.2 Hz, 1H), 3.38 (s, 1H), 3.33 (s, 3H), 3.22 (dd, *J* = 14.9, 7.3 Hz, 1H), 2.44 (h, *J* = 7.3 Hz, 1H), 1.49 (s, 3H); <sup>13</sup>C NMR (151 MHz, Chloroform-*d*: methanol-*d* = 10:1) δ 189.1, 179.2, 166.3, 164.4, 154.5, 151.1, 142.4, 140.4, 137.6, 137.4, 132.9, 128.9, 128.8, 128.7, 128.1, 128.0,

125.6, 125.4, 120.4, 119.1, 94.1, 71.9, 51.3, 29.7, 20.1, 19.9, 11.9. HRMS (ESI)  $m/z$  Calcd. for  $C_{37}H_{30}N_3O_4S$  ( $[M+H]^+$ ) 612.1952, Found 612.1949. Enantiomeric excess was determined to be 91% (determined by HPLC using chiral AD-H column, hexane/2-propanol = 7/3,  $\lambda = 254$  nm, 30 °C, 0.8 mL/min,  $t_{major} = 13.4$  min,  $t_{minor} = 17.3$  min).

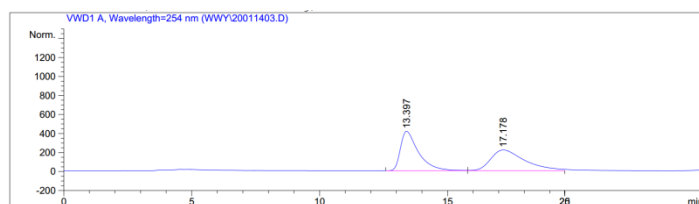

| Peak # | RetTime [min] | Type | Width [min] | Area mAU *s | Height [mAU] | Area %  |
|--------|---------------|------|-------------|-------------|--------------|---------|
| 1      | 13.397        | BB   | 0.7205      | 2.03498e4   | 415.08429    | 49.4167 |
| 2      | 17.178        | BB   | 1.4082      | 2.08302e4   | 217.85573    | 50.5833 |

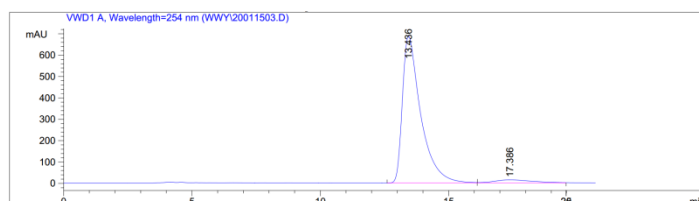

| Peak # | RetTime [min] | Type | Width [min] | Area mAU *s | Height [mAU] | Area %  |
|--------|---------------|------|-------------|-------------|--------------|---------|
| 1      | 13.436        | BB   | 0.7261      | 3.40209e4   | 687.16327    | 95.5481 |
| 2      | 17.386        | BB   | 1.4628      | 1585.15601  | 14.63865     | 4.4519  |

### Compound 5ea

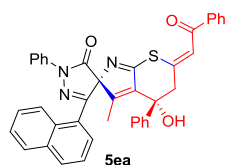

Prepared according to the procedure within 12 h as white solid (52.4 mg, 83% yield, dr = 4:1). mp 160-162 °C;  $[\alpha]_D^{16} = 102.73$  (c 0.28,  $CH_2Cl_2$ );  $^1H$  NMR (600 MHz, Chloroform:MeOH = 10:1- $d$ )  $\delta$  9.08 (d,  $J = 8.6$  Hz, 1H), 8.00 (d,  $J = 8.0$  Hz, 2H), 7.86 (d,  $J = 8.2$  Hz, 1H), 7.81 (d,  $J = 8.3$  Hz, 3H), 7.59 (t,  $J = 7.8$  Hz, 1H), 7.58-7.48 (m, 4H), 7.47 (t,  $J = 7.8$  Hz, 2H), 7.38 (q,  $J = 7.6$  Hz, 4H), 7.29 (dd,  $J = 14.9, 7.6$  Hz, 2H), 7.17 (d,  $J = 7.3$  Hz, 3H), 6.93 (s, 1H), 3.47 (d,  $J = 14.4$  Hz, 1H), 3.00 (dd,  $J = 14.5, 4.0$  Hz, 1H), 2.84 (s, 1H), 1.37 (s, 3H);  $^{13}C$  NMR (151 MHz, Chloroform- $d$ )  $\delta$  188.6, 178.7, 165.5, 156.5, 154.9, 150.4, 142.2, 140.3, 137.9, 137.7, 137.4, 134.1, 132.9, 131.7, 130.4, 129.1, 129.0, 129.0, 128.8, 128.6, 128.3, 128.2, 128.2, 127.9, 126.9, 126.4, 126.3, 126.0, 125.8, 125.3, 125.3, 125.2, 120.6, 119.2, 94.6, 72.3, 51.3, 21.5, 12.2. HRMS (ESI)  $m/z$  Calcd. for  $C_{40}H_{30}N_3O_3S$  ( $[M+H]^+$ ) 632.2002, Found 632.2005. Enantiomeric excess was determined to be 99% (determined by HPLC using chiral AD-H column, hexane/2-propanol = 7/3,  $\lambda = 254$  nm, 30 °C, 0.8 mL/min,  $t_{major} = 21.3$  min,  $t_{minor} = 10.9$  min).

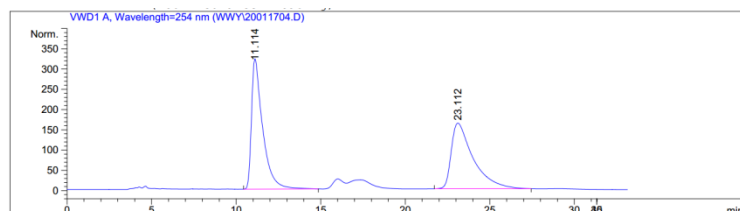

| Peak # | RetTime [min] | Type | Width [min] | Area mAU *s | Height [mAU] | Area %  |
|--------|---------------|------|-------------|-------------|--------------|---------|
| 1      | 11.114        | BB   | 0.6554      | 1.47698e4   | 321.47485    | 50.2616 |
| 2      | 23.112        | BB   | 1.3033      | 1.46161e4   | 162.17950    | 49.7384 |

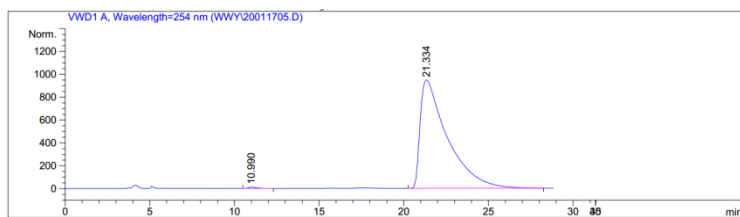

| Peak # | RetTime [min] | Type | Width [min] | Area mAU  | Area *s | Height [mAU] | Area %  |
|--------|---------------|------|-------------|-----------|---------|--------------|---------|
| 1      | 10.990        | BB   | 0.4880      | 378.81726 |         | 11.19394     | 0.3568  |
| 2      | 21.334        | BB   | 1.5565      | 1.05781e5 |         | 947.00714    | 99.6432 |

### Compound 5ga

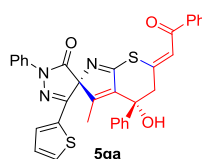

Prepared according to the procedure within 12 h as yellow solid (47.5 mg, 81% yield, dr = 6:1). mp 225-226 °C;  $[\alpha]_D^{17} = 30.91$  (c 0.22, CH<sub>2</sub>Cl<sub>2</sub>); <sup>1</sup>H NMR (600 MHz, Chloroform-*d*: methanol-*d* = 10:1)  $\delta$  7.92 (q, *J* = 6.3 Hz, 4H), 7.58 (q, *J* = 6.8 Hz, 3H), 7.46 (q, *J* = 8.1 Hz, 6H), 7.41 (t, *J* = 7.3 Hz, 1H), 7.32 (d, *J* = 6.9 Hz, 1H), 7.27 (q, *J* = 7.0 Hz, 1H), 7.18 (s, 1H), 7.02 (dd, *J* = 23.1, 4.0 Hz, 2H), 3.55 (d, *J* = 14.6 Hz, 1H), 3.37 (s, 1H), 3.26 (d, *J* = 14.7 Hz, 1H), 1.50 (s, 3H); <sup>13</sup>C NMR (151 MHz, Chloroform-*d*: methanol-*d* = 10:1)  $\delta$  189.1, 180.2, 165.6, 155.7, 150.9, 150.4, 142.5, 140.5, 137.4, 137.3, 133.0, 132.2, 129.4, 128.9, 128.7, 128.6, 128.4, 128.1, 128.0, 126.0, 125.3, 120.5, 119.3, 92.8, 71.8, 51.2, 11.8. HRMS (ESI) *m/z* Calcd. for C<sub>34</sub>H<sub>26</sub>N<sub>3</sub>O<sub>3</sub>S<sub>2</sub> ([M+H]<sup>+</sup>) 588.1410, Found 588.1402. Enantiomeric excess was determined to be 99% (determined by HPLC using chiral AD-H column, hexane/2-propanol = 7/3,  $\lambda$  = 254 nm, 30 °C, 0.8 mL/min, t<sub>major</sub> = 21.3 min, t<sub>minor</sub> = 42.7 min).

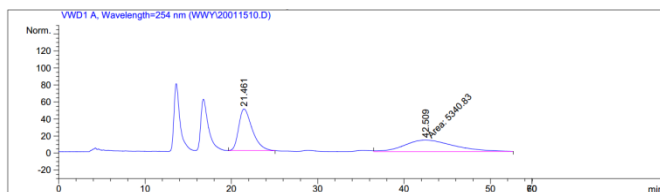

| Peak # | RetTime [min] | Type | Width [min] | Area mAU   | Area *s | Height [mAU] | Area %  |
|--------|---------------|------|-------------|------------|---------|--------------|---------|
| 1      | 21.461        | BB   | 1.6309      | 5352.28467 |         | 48.95086     | 50.0536 |
| 2      | 42.509        | MM   | 6.5990      | 5340.83105 |         | 13.48909     | 49.9464 |

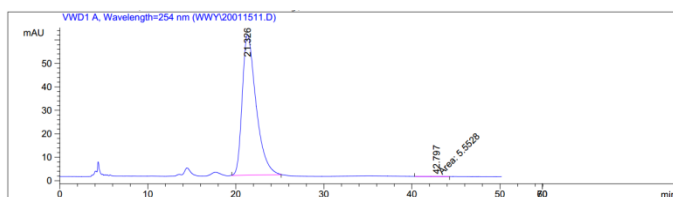

| Peak # | RetTime [min] | Type | Width [min] | Area mAU   | Area *s | Height [mAU] | Area %  |
|--------|---------------|------|-------------|------------|---------|--------------|---------|
| 1      | 21.326        | BB   | 1.5791      | 6545.97754 |         | 59.84095     | 99.9152 |
| 2      | 42.797        | MM   | 2.0956      | 5.55280    |         | 4.41626e-2   | 0.0848  |

### Compound 5ha

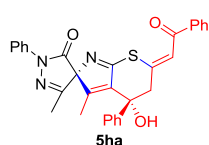

Prepared according to the procedure within 12 h as white solid (45.6 mg, 88% yield, dr > 20:1). mp 110.2-112.5 °C;  $[\alpha]_D^{17} = 21.00$  (c 0.22, CH<sub>2</sub>Cl<sub>2</sub>); <sup>1</sup>H NMR (400 MHz, Chloroform-*d*)  $\delta$  7.94-7.76 (m, 2H), 7.58-7.49 (m, 3H), 7.47-7.34 (m, 5H), 7.31 (t, *J* = 7.3 Hz, 1H), 7.20 (t, *J* = 7.4 Hz, 1H), 7.09 (s, 1H), 3.51 (d, *J* = 14.4 Hz, 1H), 3.21 (d, *J* = 14.4 Hz, 1H), 3.10 (s, 1H), 1.87 (s, 3H), 1.49 (s, 3H); <sup>13</sup>C NMR (101 MHz, Chloroform-*d*)  $\delta$  188.7, 178.9, 166.2, 157.0, 153.9, 150.3, 141.9, 140.7, 137.6, 137.5, 132.9, 129.0,

128.9, 128.7, 128.3, 128.2, 125.6, 125.3, 120.7, 119.0, 94.0, 72.5, 51.4, 13.9, 11.8. HRMS (ESI)  $m/z$  Calcd. for  $C_{31}H_{26}N_3O_3S$  ( $[M+H]^+$ ) 520.1689, Found 520.1689. Enantiomeric excess was determined to be 95% (determined by HPLC using chiral AD-H column, hexane/2-propanol = 7/3,  $\lambda$  = 254 nm, 30 °C, 0.8 mL/min,  $t_{major}$  = 14.6 min,  $t_{minor}$  = 9.4 min).

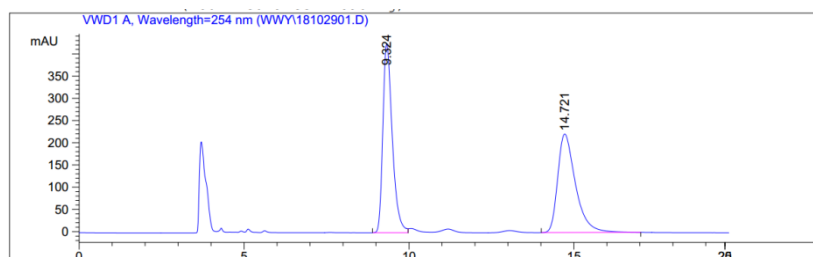

| Peak # | RetTime [min] | Type | Width [min] | Area mAU *s | Height [mAU] | Area %  |
|--------|---------------|------|-------------|-------------|--------------|---------|
| 1      | 9.324         | BV   | 0.3011      | 8435.51270  | 425.59113    | 50.3756 |
| 2      | 14.721        | BB   | 0.5654      | 8309.73828  | 221.72362    | 49.6244 |

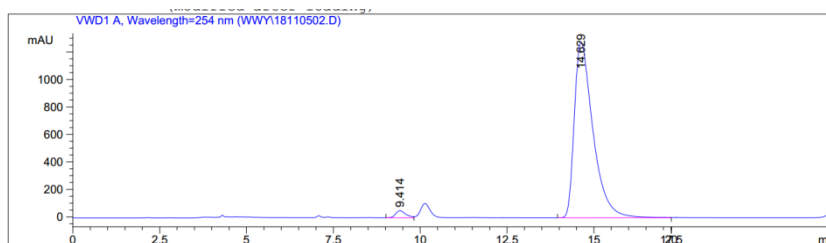

| Peak # | RetTime [min] | Type | Width [min] | Area mAU *s | Height [mAU] | Area %  |
|--------|---------------|------|-------------|-------------|--------------|---------|
| 1      | 9.414         | BV   | 0.3099      | 1068.23193  | 51.93084     | 2.1772  |
| 2      | 14.629        | PB   | 0.5664      | 4.79954e4   | 1277.57483   | 97.8228 |

### Compound 5ja

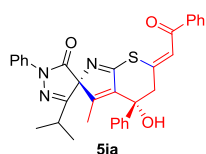

Prepared according to the procedure within 12 h as white solid (44.3 mg, 81% yield, dr = 3.4:1). mp 172.0-174.1 °C;  $[\alpha]_D^{17}$  = 29.37 ( $c$  0.12,  $CH_2Cl_2$ );  $^1H$  NMR (600 MHz, Chloroform- $d$ )  $\delta$  7.90 (d,  $J$  = 7.7 Hz, 2H), 7.86 (d,  $J$  = 8.1 Hz, 2H), 7.55 (d,  $J$  = 8.0 Hz, 3H), 7.46 (t,  $J$  = 7.7 Hz, 2H), 7.41 (q,  $J$  = 8.3 Hz, 4H), 7.33 (t,  $J$  = 7.4 Hz, 1H), 7.21 (t,  $J$  = 7.5 Hz, 1H), 7.14 (s, 1H), 3.52 (d,  $J$  = 14.4 Hz, 1H), 3.23 (d,  $J$  = 14.5 Hz, 1H), 2.47 (s, 1H), 2.46-2.41 (m, 1H), 1.50 (s, 3H), 1.19 (d,  $J$  = 6.9 Hz, 3H), 1.14 (d,  $J$  = 6.9 Hz, 3H);  $^{13}C$  NMR (101 MHz, Chloroform- $d$ : methanol- $d$  = 10:1)  $\delta$  188.9, 178.9, 166.3, 164.4, 154.5, 151.0, 142.4, 140.2, 137.6, 137.5, 132.9, 128.9, 128.8, 128.7, 128.1, 128.1, 125.6, 125.4, 120.4, 119.1, 94.1, 71.9, 51.4, 29.8, 20.1, 20.0, 12.0. HRMS (ESI)  $m/z$  Calcd. for  $C_{33}H_{30}N_3O_3S$  ( $[M+H]^+$ ) 548.2002, Found 548.2000. Enantiomeric excess was determined to be 99% (determined by HPLC using chiral AD-H column, hexane/2-propanol = 7/3,  $\lambda$  = 254 nm, 30 °C, 0.8 mL/min,  $t_{major}$  = 16.5 min,  $t_{minor}$  = 25.7 min).

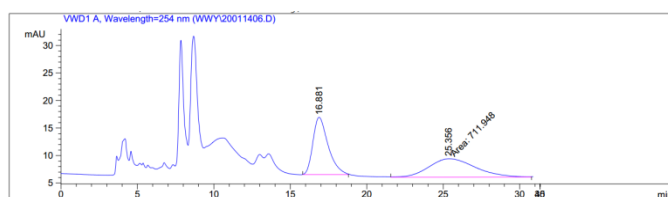

| Peak # | RetTime [min] | Type | Width [min] | Area mAU *s | Height [mAU] | Area %  |
|--------|---------------|------|-------------|-------------|--------------|---------|
| 1      | 16.881        | BB   | 0.9755      | 720.17621   | 10.41609     | 50.2873 |
| 2      | 25.356        | MM   | 3.5387      | 711.94775   | 3.35318      | 49.7127 |

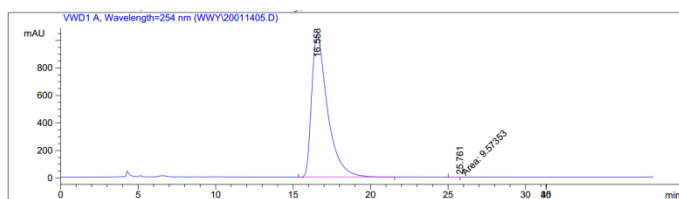

| Peak # | RetTime [min] | Type | Width [min] | Area [mAU*s] | Height [mAU] | Area %  |
|--------|---------------|------|-------------|--------------|--------------|---------|
| 1      | 16.558        | BB   | 1.0678      | 7.37224e4    | 1030.22559   | 99.9870 |
| 2      | 25.761        | MM   | 0.7289      | 9.57353      | 2.18908e-1   | 0.0130  |

### Compound 5ka

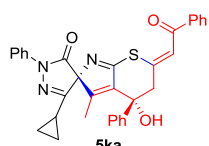

Prepared according to the procedure within 12 h as white solid (49.1 mg, 90% yield, dr > 20:1). mp 150.5-152.1 °C [ $\alpha$ ]<sub>D</sub><sup>16</sup> = 66.36 (c 0.21, CH<sub>2</sub>Cl<sub>2</sub>); <sup>1</sup>H NMR (400 MHz, DMSO-*d*<sub>6</sub>) δ 7.96 (d, *J* = 7.7 Hz, 2H), 7.78 (d, *J* = 8.1 Hz, 2H), 7.62 (t, *J* = 7.4 Hz, 1H), 7.53 (dd, *J* = 12.5, 6.0 Hz, 5H), 7.45 (t, *J* = 7.9 Hz, 2H), 7.37 (t, *J* = 7.5 Hz, 2H), 7.26 (dt, *J* = 14.7, 7.4 Hz, 2H), 6.59 (s, 1H), 3.65 (d, *J* = 14.4 Hz, 1H), 3.37 (d, *J* = 14.5 Hz, 1H), 1.50 (p, *J* = 7.0, 6.6 Hz, 1H), 1.07-0.81 (m, 4H); <sup>13</sup>C NMR (101 MHz, DMSO-*d*<sub>6</sub>) δ 188.7, 179.0, 166.3, 162.8, 153.1, 152.0, 143.3, 141.8, 137.7, 137.4, 133.7, 129.6, 129.3, 128.7, 128.5, 128.2, 126.3, 126.0, 120.7, 119.1, 93.7, 79.8, 72.3, 50.0, 12.1, 9.9, 9.3, 9.1. HRMS (ESI) *m/z* Calcd. for C<sub>33</sub>H<sub>28</sub>N<sub>3</sub>O<sub>3</sub>S ([M+H]<sup>+</sup>) 546.1846, Found 546.1846. Enantiomeric excess was determined to be 95% (determined by HPLC using chiral AD-H column, hexane/2-propanol = 7/3, λ = 254 nm, 30 °C, 0.8 mL/min, t<sub>major</sub> = 21.3 min, t<sub>minor</sub> = 11.7 min).

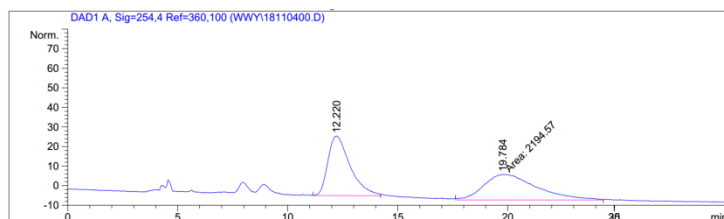

| Peak # | RetTime [min] | Type | Width [min] | Area [mAU*s] | Height [mAU] | Area %  |
|--------|---------------|------|-------------|--------------|--------------|---------|
| 1      | 12.220        | PB   | 1.0412      | 2139.50122   | 30.54407     | 49.3647 |
| 2      | 19.784        | MM   | 2.7804      | 2194.56909   | 13.15488     | 50.6353 |

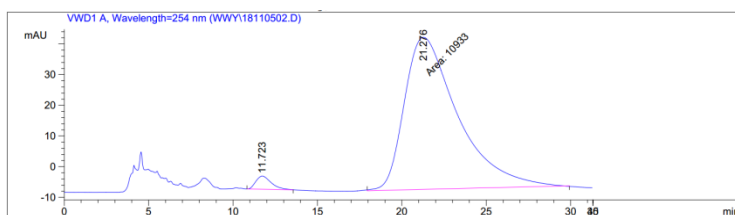

| Peak # | RetTime [min] | Type | Width [min] | Area [mAU*s] | Height [mAU] | Area %  |
|--------|---------------|------|-------------|--------------|--------------|---------|
| 1      | 11.723        | PB   | 0.8059      | 271.52014    | 4.28724      | 2.4233  |
| 2      | 21.276        | MM   | 3.6739      | 1.09330e4    | 49.59721     | 97.5767 |

### Compound 5ah

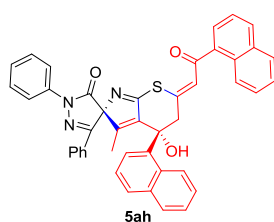

Prepared according to the procedure within 12 h as yellow solid (63.3 mg, 93% yield, dr = 4.5:1). mp 206.5-209.0 °C; [ $\alpha$ ]<sub>D</sub><sup>16</sup> = -33.44 (c 0.34, CH<sub>2</sub>Cl<sub>2</sub>); <sup>1</sup>H NMR (600 MHz, Chloroform-*d*) δ 8.54-8.29 (m, 2H), 8.08-7.81 (m, 7H), 7.61 (t, *J* = 8.2 Hz, 2H), 7.59-7.48 (m, 7H), 7.41 (dt, *J* = 16.4, 7.5 Hz, 6H), 7.23 (t, *J* = 7.5 Hz, 1H), 6.85 (s, 1H), 4.17 (d, *J* = 15.0 Hz, 1H), 3.19 (d, *J*

= 14.9 Hz, 1H), 2.81 (s, 3H);  $^{13}\text{C}$  NMR (101 MHz, Chloroform-*d*)  $\delta$  192.2, 178.2, 165.5, 155.8, 154.0, 150.0, 137.8, 136.4, 134.5, 133.8, 132.6, 131.1, 130.3, 130.3, 130.0, 129.4, 129.3, 129.1, 128.9, 128.4, 127.8, 127.1, 126.5, 126.0, 125.9, 125.8, 125.7, 125.4, 125.3, 112.6, 112.3, 119.2, 93.4, 48.8, 11.6. HRMS (ESI)  $m/z$  Calcd. for  $\text{C}_{44}\text{H}_{32}\text{N}_3\text{O}_3\text{S}$  ( $[\text{M}+\text{H}]^+$ ) 682.2159, Found 682.2159. Enantiomeric excess was determined to be 87% (determined by HPLC using chiral AD-H column, hexane/2-propanol = 7/3,  $\lambda$  = 254 nm, 30 °C, 0.8 mL/min,  $t_{\text{major}}$  = 26.6 min,  $t_{\text{minor}}$  = 10.7 min).

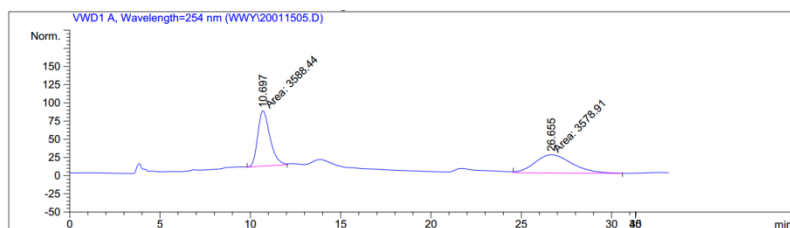

| Peak # | RetTime [min] | Type | Width [min] | Area mAU*s | Height [mAU] | Area %  |
|--------|---------------|------|-------------|------------|--------------|---------|
| 1      | 10.697        | MM   | 0.7857      | 3588.44458 | 76.11823     | 50.0665 |
| 2      | 26.655        | MM   | 2.3822      | 3578.90771 | 25.03889     | 49.9335 |

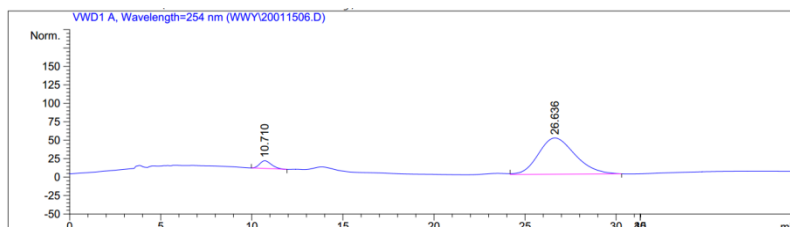

| Peak # | RetTime [min] | Type | Width [min] | Area mAU*s | Height [mAU] | Area %  |
|--------|---------------|------|-------------|------------|--------------|---------|
| 1      | 10.710        | BP   | 0.6950      | 470.93600  | 10.41508     | 6.4037  |
| 2      | 26.636        | VB   | 2.0235      | 6883.16016 | 49.07932     | 93.5963 |

### Compound 5af

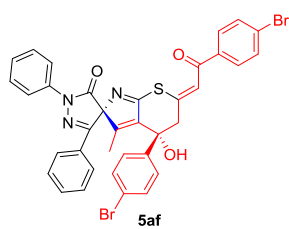

Prepared according to the procedure within 12 h as light-yellow solid (62.6 mg, 85% yield, dr > 20:1). mp 170.0-173.0 °C;  $[\alpha]_{\text{D}}^{16}$  = 112.44 (*c* 0.32,  $\text{CH}_2\text{Cl}_2$ );  $^1\text{H}$  NMR (400 MHz, Chloroform-*d*)  $\delta$  7.89 (d,  $J$  = 5.7 Hz, 2H), 7.77-7.68 (m, 2H), 7.57-7.48 (m, 2H), 7.50-7.38 (m, 8H), 7.39-7.33 (m, 1H), 7.30 (d,  $J$  = 7.7 Hz, 2H), 7.23 (s, 1H), 7.03 (s, 1H), 3.43 (d,  $J$  = 14.4 Hz, 1H), 3.33 (s, 1H), 3.12 (d,  $J$  = 14.4 Hz, 1H), 1.41-1.36 (m, 3H);  $^{13}\text{C}$  NMR (101 MHz, Chloroform-*d*)  $\delta$  187.4, 178.4, 165.7, 156.9, 154.4, 150.8, 141.5, 139.7, 137.5, 136.0, 132.1, 132.0, 131.3, 130.0, 129.7, 129.1, 129.0, 128.3, 127.1, 126.1, 125.9, 122.4, 120.3, 119.3, 93.4, 72.0, 51.4, 12.3. HRMS (ESI)  $m/z$  Calcd. for  $\text{C}_{36}\text{H}_{25}\text{Br}_2\text{N}_3\text{O}_3\text{S}$  ( $[\text{M}+\text{H}]^+$ ) 738.0056, Found 738.0063. Enantiomeric excess was determined to be 99% (determined by HPLC using chiral IC-H column, hexane/2-propanol = 7/3,  $\lambda$  = 254 nm, 30 °C, 0.8 mL/min,  $t_{\text{major}}$  = 16.6 min,  $t_{\text{minor}}$  = 20.9 min).

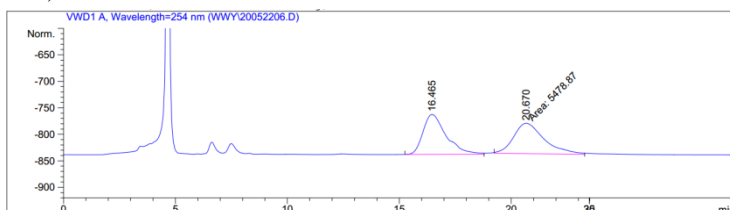

| Peak # | RetTime [min] | Type | Width [min] | Area mAU *s | Height [mAU] | Area %  |
|--------|---------------|------|-------------|-------------|--------------|---------|
| 1      | 16.465        | BB   | 1.0650      | 5387.66064  | 75.28382     | 49.5803 |
| 2      | 20.670        | MM   | 1.5910      | 5478.86670  | 57.39261     | 50.4197 |

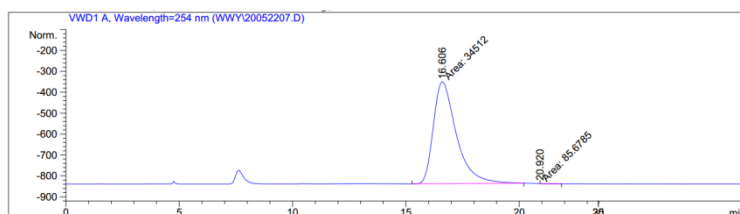

| Peak # | RetTime [min] | Type | Width [min] | Area mAU *s | Height [mAU] | Area %  |
|--------|---------------|------|-------------|-------------|--------------|---------|
| 1      | 16.606        | MM   | 1.1809      | 3.45120e4   | 487.08191    | 99.7524 |
| 2      | 20.920        | MM   | 0.7228      | 85.67849    | 1.97552      | 0.2476  |

### Compound 5'af

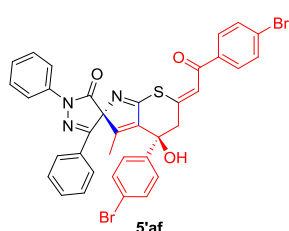

This diastereoisomer was prepared according to the procedure using DABCO as catalyst within 24 h as yellow solid (62.6 mg, 85% yield, dr = 3:1). mp 215.0-217.5 °C;  $[\alpha]_D^{17} = -144.40$  (c 0.23, CH<sub>2</sub>Cl<sub>2</sub>); <sup>1</sup>H NMR (400 MHz, Chloroform-*d*) δ 7.85 (d, *J* = 8.0 Hz, 2H), 7.59 (d, *J* = 7.9 Hz, 2H), 7.55-7.42 (m, 5H), 7.42-7.32 (m, 6H), 7.23 (d, *J* = 9.0 Hz, 3H), 6.92 (s, 1H), 4.69 (s, 1H), 3.44 (d, *J* = 14.1 Hz, 1H), 3.29 (d, *J* = 14.2 Hz, 1H),

1.70 (s, 3H); <sup>13</sup>C NMR (101 MHz, Chloroform-*d*) δ 187.4, 178.6, 165.8, 156.9, 154.4, 150.9, 141.6, 139.7, 137.4, 135.9, 132.1, 132.0, 131.3, 129.9, 129.7, 129.1, 129.1, 128.3, 127.1, 126.2, 125.9, 122.4, 120.3, 119.3, 93.4, 71.9, 51.3, 12.2. HRMS (ESI) *m/z* Calcd. for C<sub>36</sub>H<sub>25</sub>Br<sub>2</sub>N<sub>3</sub>O<sub>3</sub>S ([M+H]<sup>+</sup>) 738.0056, Found 738.0063. Enantiomeric excess was determined to be 99% (determined by HPLC using chiral AD-H column, hexane/2-propanol = 7/3, λ = 254 nm, 30 °C, 0.8 mL/min, t<sub>major</sub> = 12.5 min, t<sub>minor</sub> = 17.9 min).

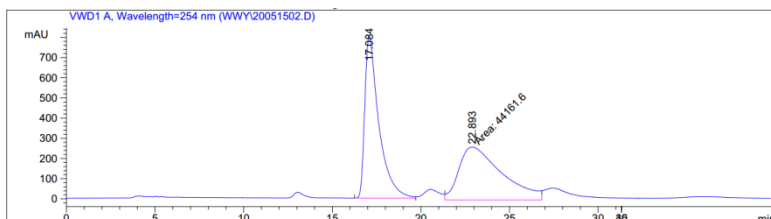

| Peak # | RetTime [min] | Type | Width [min] | Area mAU *s | Height [mAU] | Area %  |
|--------|---------------|------|-------------|-------------|--------------|---------|
| 1      | 17.084        | PV   | 0.8026      | 4.42749e4   | 802.20886    | 50.0641 |
| 2      | 22.893        | MM   | 2.8074      | 4.41616e4   | 262.17572    | 49.9359 |

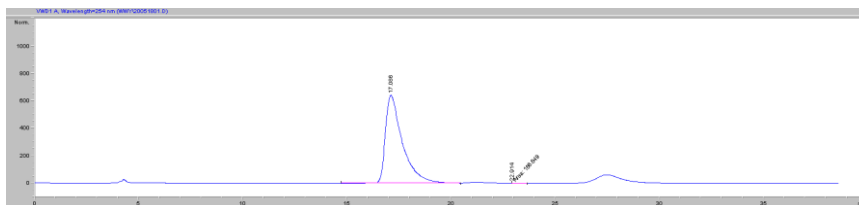

| Peak # | RetTime [min] | Type | Width [min] | Area mAU *s | Height [mAU] | Area %  |
|--------|---------------|------|-------------|-------------|--------------|---------|
| 1      | 17.086        | BB   | 0.8304      | 3.67616e4   | 644.10669    | 99.5487 |
| 2      | 22.914        | MM   | 0.5041      | 166.64861   | 3.86023      | 0.4513  |



## One-pot procedure for the synthesis of compound **5aa** from **1a** and **2a**.

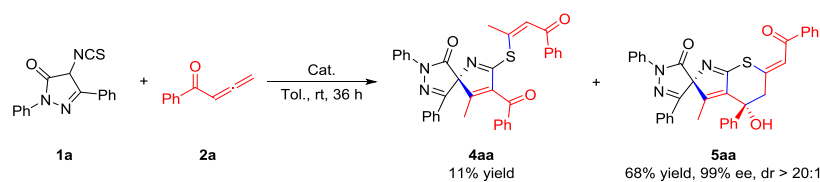

A tube equipped with a magnetic stir bar was charged with 4-isothiocyanato pyrazolone **1a** (0.2 mmol), **Q4** (0.02 mmol), and toluene (2 mL). After stirring for 5 min, alkynyl ketone **2a** (0.5 mmol) was added in one portion. The reaction was detected by TLC. After 36 h, the mixture was purified by column chromatography on silica gel (unless otherwise noticed, petroleum ether/EtOAc = 5:1 was used as the eluent) directly to give the product **5aa**.

## Asymmetric aldol reaction of racemic **4** to compound **5**.

**Table S1 Optimization of Reaction Conditions**

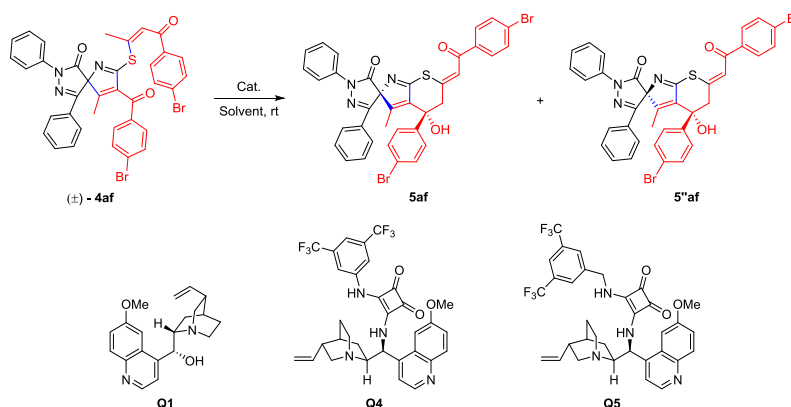

| Entry | Catalyst  | Amount of Cat. (X equiv) | Solvent            | <i>t</i> [h] | Yield <sup>a</sup> [%] |              | Ee <sup>b</sup> [%] |              |
|-------|-----------|--------------------------|--------------------|--------------|------------------------|--------------|---------------------|--------------|
|       |           |                          |                    |              | <b>5af</b>             | <b>5''af</b> | <b>5af</b>          | <b>5''af</b> |
| 1     | <b>Q1</b> | 1                        | DCM                | 24           | 49                     | 45           | 77                  | 49           |
| 2     | <b>Q4</b> | 1                        | DCM                | 2            | 47                     | 50           | 99                  | 85           |
| 3     | <b>Q5</b> | 1                        | DCM                | 12           | 41                     | 42           | 97                  | 73           |
| 4     | <b>Q4</b> | 1                        | CHCl <sub>3</sub>  | 12           | 41                     | 40           | 99                  | 87           |
| 5     | <b>Q4</b> | 1                        | THF                | 12           | 40                     | 40           | 95                  | 89           |
| 6     | <b>Q4</b> | 1                        | CH <sub>3</sub> CN | 12           | 41                     | 43           | 97                  | 87           |
| 7     | <b>Q4</b> | 1                        | toluene            | 12           | 46                     | 48           | 93                  | 85           |
| 8     | <b>Q4</b> | 0.1                      | CHCl <sub>3</sub>  | 12           | 45                     | 43           | 99                  | 91           |
| 9     | <b>Q4</b> | 0.05                     | CHCl <sub>3</sub>  | 14           | 41                     | 40           | 99                  | 88           |

The reaction was carried out on a 0.1 mmol scale in 1 mL solvent with catalyst. <sup>a</sup>Isolated yield was given. <sup>b</sup>The ee was determined by chiral HPLC.

## Asymmetric aldol reactions of racemic **4** to compound **5**

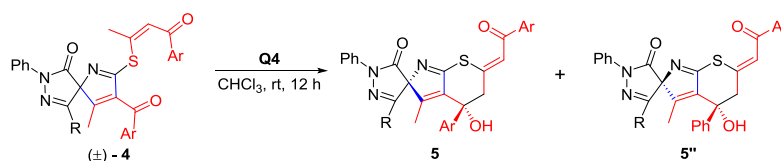

To a solution of racemic **4** (0.1 mmol, 1.0 eq.) in CHCl<sub>3</sub> (1.0 mL) was added **Q4** (6.3 mg, 0.01 mmol, 0.1 eq.). The reaction mixture was stirred at rt for 12 h. The reaction was detected by TLC.

When the reaction finished, the crude mixture was purified by column chromatography on silica gel to give **5**.

### Compound **5aa**

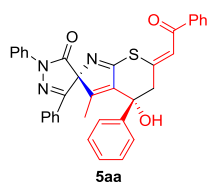

Prepared according to the procedure within 12 h as white solid (25.0 mg, 43% yield). Enantiomeric excess was determined to be 99% (determined by HPLC using chiral IC-H column, hexane/2-propanol = 7/3,  $\lambda = 254$  nm, 30 °C, 0.8 mL/min,  $t_{\text{major}} = 12.4$  min,  $t_{\text{minor}} = 18.8$  min).

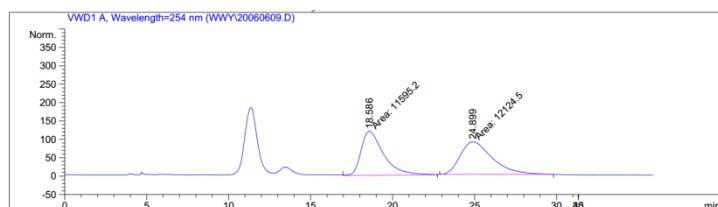

| Peak # | RetTime [min] | Type | Width [min] | Area mAU *s | Height [mAU] | Area %  |
|--------|---------------|------|-------------|-------------|--------------|---------|
| 1      | 18.586        | MM   | 1.6090      | 1.15952e4   | 120.10866    | 48.8842 |
| 2      | 24.899        | MM   | 2.2865      | 1.21245e4   | 88.37763     | 51.1158 |

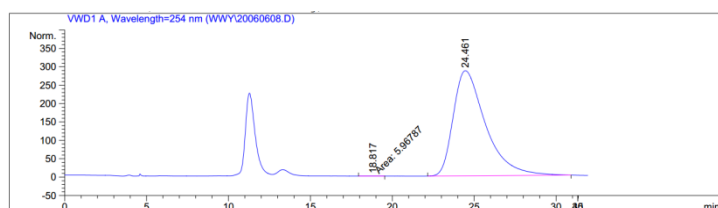

| Peak # | RetTime [min] | Type | Width [min] | Area mAU *s | Height [mAU] | Area %  |
|--------|---------------|------|-------------|-------------|--------------|---------|
| 1      | 18.817        | MM   | 0.9314      | 5.96787     | 1.06793e-1   | 0.0152  |
| 2      | 24.461        | BB   | 2.0148      | 3.93021e4   | 286.08875    | 99.9848 |

### Compound **5''aa**

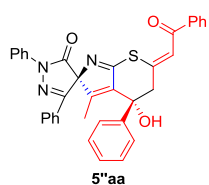

Prepared according to the procedure within 12 h as white solid (25.6 mg, 44% yield). mp 190.0-192.0 °C;  $[\alpha]_{\text{D}}^{17} = -144.40$  ( $c$  0.31,  $\text{CH}_2\text{Cl}_2$ );  $^1\text{H}$  NMR (400 MHz, Chloroform- $d$ )  $\delta$  7.92 (d,  $J = 7.5$  Hz, 2H), 7.83 (d,  $J = 7.0$  Hz, 2H), 7.52 (d,  $J = 8.4$  Hz, 3H), 7.47-7.32 (m, 9H), 7.30 (t,  $J = 6.9$  Hz, 3H), 7.23 (d,  $J = 7.6$  Hz, 1H), 7.03 (s, 1H), 4.39 (s, 1H), 3.47 (d,  $J = 12.8$  Hz, 1H), 3.37 (d,  $J = 14.1$  Hz, 1H), 1.87 (s, 3H);  $^{13}\text{C}$  NMR (101 MHz, Chloroform- $d$ )  $\delta$  188.8, 179.3, 166.6, 156.3, 154.8, 150.5, 142.2, 142.1, 137.5, 137.5, 132.9, 131.3, 130.0, 129.0, 128.9, 128.6, 128.6, 128.2, 128.1, 126.1, 125.2, 120.7, 119.4, 93.4, 72.4, 51.9, 12.1. HRMS (ESI)  $m/z$  Calcd. for  $\text{C}_{36}\text{H}_{28}\text{N}_3\text{O}_3\text{S}$  ( $[\text{M}+\text{H}]^+$ ) 582.1846, Found 582.1846. Enantiomeric excess was determined to be 89% (determined by HPLC using chiral IC-H column, hexane/2-propanol = 7/3,  $\lambda = 254$  nm, 30 °C, 0.8 mL/min,  $t_{\text{major}} = 16.1$  min,  $t_{\text{minor}} = 11.8$  min)

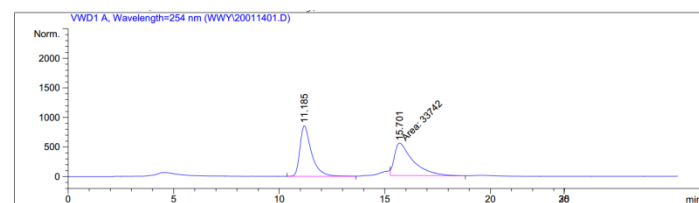

| Peak # | RetTime [min] | Type | Width [min] | Area mAU *s | Height [mAU] | Area %  |
|--------|---------------|------|-------------|-------------|--------------|---------|
| 1      | 11.185        | BB   | 0.5622      | 3.25348e4   | 854.43909    | 49.0893 |
| 2      | 15.701        | MM   | 1.0236      | 3.37420e4   | 549.40326    | 50.9107 |

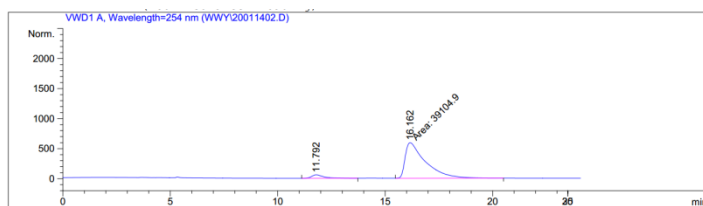

| Peak # | RetTime [min] | Type | Width [min] | Area mAU   | Area *s   | Height [mAU] | Area %  |
|--------|---------------|------|-------------|------------|-----------|--------------|---------|
| 1      | 11.792        | BB   | 0.5847      | 2276.18921 | 57.07076  | 57.07076     | 5.5005  |
| 2      | 16.162        | MM   | 1.0980      | 3.91049e4  | 593.55243 | 593.55243    | 94.4995 |

### Compound 5ba

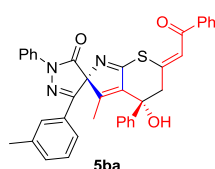

Prepared according to the procedure within 12 h as white solid (12.4 mg, 41% yield). mp 215.5-217.1 °C;  $[\alpha]_D^{15} = -77.81$  (*c* 0.21, CH<sub>2</sub>Cl<sub>2</sub>); <sup>1</sup>H NMR (400 MHz, Chloroform-*d*) δ 7.91 (d, *J* = 8.1 Hz, 2H), 7.82 (d, *J* = 7.7 Hz, 2H), 7.52 (t, *J* = 7.4 Hz, 1H), 7.41 (q, *J* = 7.5 Hz, 6H), 7.36 (s, 1H), 7.33-7.27 (m, 4H), 7.25-7.20 (m, 3H), 7.02 (s, 1H), 4.21 (s, 1H), 3.46 (d, *J* = 14.1 Hz, 1H), 3.37 (d, *J* = 14.1 Hz, 1H), 2.36 (s, 3H), 1.68 (s, 3H); <sup>13</sup>C NMR (101 MHz, Chloroform-*d*) δ 188.7, 179.1, 166.4, 156.5, 154.9, 150.6, 142.2, 141.8, 138.6, 137.6, 137.5, 132.9, 132.2, 130.0, 129.0, 128.8, 128.6, 128.6, 128.2, 128.1, 126.5, 126.0, 125.2, 123.3, 120.6, 119.4, 93.4, 72.6, 51.9, 21.5, 12.2. HRMS (ESI) *m/z* Calcd. for C<sub>37</sub>H<sub>30</sub>N<sub>3</sub>O<sub>3</sub>S ([M+H]<sup>+</sup>) 596.2002, Found 596.2001. Enantiomeric excess was determined to be 99% (determined by HPLC using chiral IC-H column, hexane/2-propanol = 7/3, λ = 254 nm, 30 °C, 0.8 mL/min, t<sub>major</sub> = 9.1 min, t<sub>minor</sub> = 13.2 min)

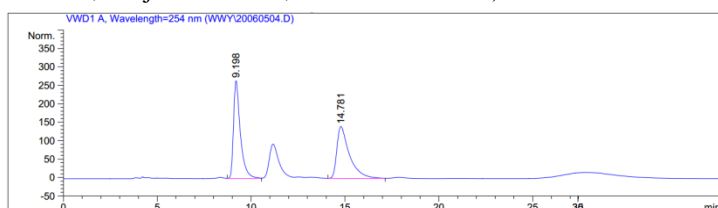

| Peak # | RetTime [min] | Type | Width [min] | Area mAU   | Area *s   | Height [mAU] | Area %  |
|--------|---------------|------|-------------|------------|-----------|--------------|---------|
| 1      | 9.198         | VV   | 0.3695      | 6709.02832 | 265.12314 | 265.12314    | 50.6082 |
| 2      | 14.781        | VB   | 0.6719      | 6547.76807 | 140.86249 | 140.86249    | 49.3918 |

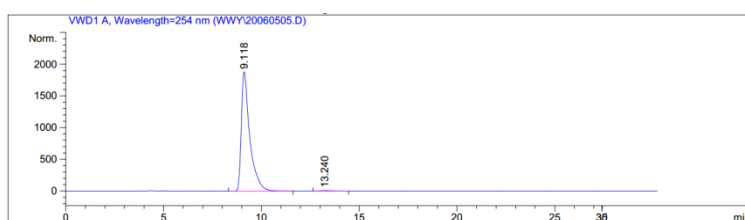

| Peak # | RetTime [min] | Type | Width [min] | Area mAU  | Area *s    | Height [mAU] | Area %  |
|--------|---------------|------|-------------|-----------|------------|--------------|---------|
| 1      | 9.118         | BB   | 0.4354      | 5.66046e4 | 1881.55078 | 1881.55078   | 99.4529 |
| 2      | 13.240        | BB   | 0.5595      | 311.37698 | 8.09267    | 8.09267      | 0.5471  |

### Compound 5''ba

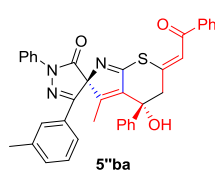

Prepared according to the procedure within 12 h as white solid (22.0 mg, 37% yield). mp 140.5-142.8 °C;  $[\alpha]_D^{16} = 10.00$  (*c* 0.11, CH<sub>2</sub>Cl<sub>2</sub>); <sup>1</sup>H NMR (400 MHz, Chloroform-*d*) δ 7.95 (d, *J* = 8.1 Hz, 2H), 7.88 (d, *J* = 7.7 Hz, 2H), 7.57 (d, *J* = 7.8 Hz, 2H), 7.50 (t, *J* = 3.4 Hz, 2H), 7.40 (dq, *J* = 15.4, 7.7 Hz, 9H), 7.11 (s, 1H), 3.78 (s, 1H), 3.55 (d, *J* = 14.6 Hz, 1H), 3.21 (d, *J* = 14.6 Hz, 1H), 2.30 (s, 3H), 1.40 (s, 3H); <sup>13</sup>C NMR (101 MHz, Chloroform-*d*) δ 188.6, 178.8, 165.9, 156.6, 154.7, 150.7,

142.2, 140.0, 138.6, 137.7, 137.5, 132.9, 132.1, 130.0, 129.0, 128.9, 128.7, 128.6, 128.2, 126.4, 125.9, 125.4, 125.2, 123.2, 120.4, 119.3, 93.4, 72.7, 51.3, 21.5, 12.1. HRMS (ESI)  $m/z$  Calcd. for  $C_{37}H_{30}N_3O_3S$  ( $[M+H]^+$ ) 596.2002, Found 596.2002. Enantiomeric excess was determined to be 99% (determined by HPLC using chiral IC-H column, hexane/2-propanol = 7/3,  $\lambda$  = 254 nm, 30 °C, 0.8 mL/min,  $t_{major}$  = 10.8 min,  $t_{minor}$  = 27.8 min).

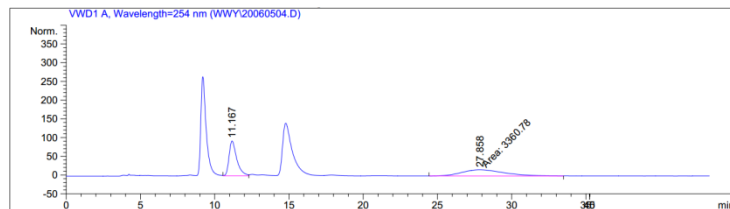

| Peak # | RetTime [min] | Type | Width [min] | Area mAU   | Area *s  | Height [mAU] | Area % |
|--------|---------------|------|-------------|------------|----------|--------------|--------|
| 1      | 11.167        | VV   | 0.5411      | 3395.02466 | 93.28299 | 50.2535      |        |
| 2      | 27.858        | MM   | 3.3586      | 3360.77710 | 16.67727 | 49.7465      |        |

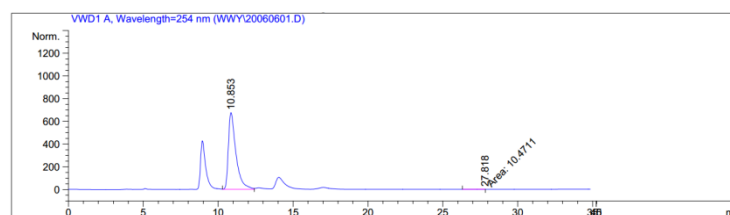

| Peak # | RetTime [min] | Type | Width [min] | Area mAU  | Area *s    | Height [mAU] | Area % |
|--------|---------------|------|-------------|-----------|------------|--------------|--------|
| 1      | 10.853        | VV   | 0.5160      | 2.38182e4 | 675.80597  | 99.9561      |        |
| 2      | 27.818        | MM   | 1.4117      | 10.47107  | 1.23623e-1 | 0.0439       |        |

### Compound 5ha

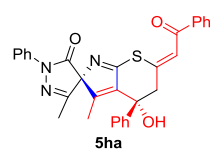

Prepared according to the procedure within 12 h as white solid (12.4 mg, 47% yield). Enantiomeric excess was determined to be 97% (determined by HPLC using chiral IC-H column, hexane/2-propanol = 7/3,  $\lambda$  = 254 nm, 30 °C, 0.8 mL/min,  $t_{major}$  = 17.7 min,  $t_{minor}$  = 10.7 min).

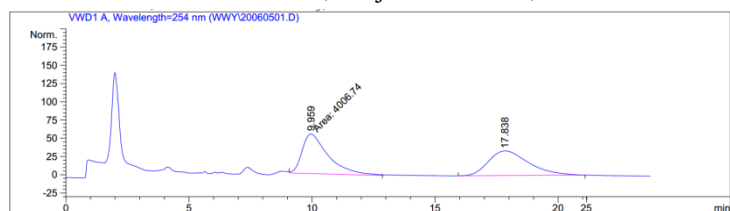

| Peak # | RetTime [min] | Type | Width [min] | Area mAU   | Area *s  | Height [mAU] | Area % |
|--------|---------------|------|-------------|------------|----------|--------------|--------|
| 1      | 9.959         | MM   | 1.2332      | 4006.74048 | 54.14888 | 50.9973      |        |
| 2      | 17.838        | BB   | 1.6911      | 3850.02393 | 33.77238 | 49.0027      |        |

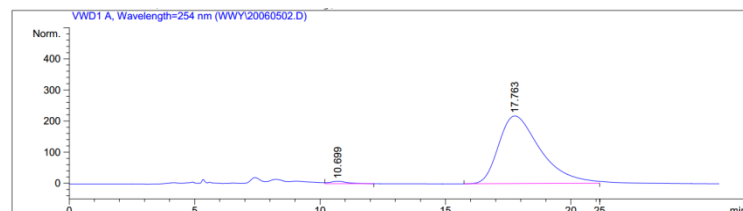

| Peak # | RetTime [min] | Type | Width [min] | Area mAU  | Area *s   | Height [mAU] | Area % |
|--------|---------------|------|-------------|-----------|-----------|--------------|--------|
| 1      | 10.699        | VB   | 0.7277      | 397.22000 | 7.80447   | 1.5297       |        |
| 2      | 17.763        | BB   | 1.7692      | 2.55696e4 | 217.71043 | 98.4703      |        |

## Compound 5''ha

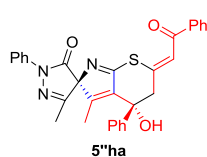

Prepared according to the procedure within 12 h as white solid (12.4 mg, 47% yield). mp 117.0-120.0 °C;  $[\alpha]_D^{17} = -50.63$  (*c* 0.21, CH<sub>2</sub>Cl<sub>2</sub>); <sup>1</sup>H NMR (400 MHz, Chloroform-*d*) δ 7.79 (dd, *J* = 6.9, 1.5 Hz, 4H), 7.50 (t, *J* = 7.4 Hz, 1H), 7.45-7.37 (m, 4H), 7.40-7.25 (m, 6H), 7.18 (t, *J* = 7.4 Hz, 1H), 6.98 (s, 1H), 4.50 (s, 1H), 3.43-3.27 (m, 2H), 1.91 (s, 3H), 1.63 (s, 3H); <sup>13</sup>C NMR (101 MHz, Chloroform-*d*) δ 188.7, 179.7, 167.0, 157.1, 153.8, 150.3, 142.5, 142.1, 137.5, 137.4, 132.9, 128.9, 128.7, 128.6, 128.2, 128.1, 125.8, 125.2, 120.7, 119.2, 72.5, 51.8, 13.8, 11.8. HRMS (ESI) *m/z* Calcd. for C<sub>31</sub>H<sub>26</sub>N<sub>3</sub>O<sub>3</sub>S ([M+H]<sup>+</sup>) 520.1689, Found 520.1688. Enantiomeric excess was determined to be 91% (determined by HPLC using chiral AD-H column, hexane/2-propanol = 7/3, λ = 254 nm, 30 °C, 0.8 mL/min, *t*<sub>major</sub> = 8.8 min, *t*<sub>minor</sub> = 12.9 min).

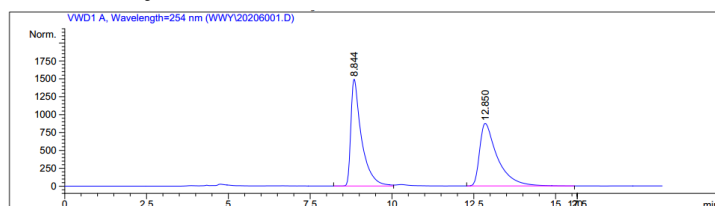

| Peak # | RetTime [min] | Type | Width [min] | Area mAU * s | Height [mAU] | Area %  |
|--------|---------------|------|-------------|--------------|--------------|---------|
| 1      | 8.844         | VV   | 0.3223      | 3.37590e4    | 1491.49707   | 50.5889 |
| 2      | 12.850        | VB   | 0.5461      | 3.29731e4    | 874.75891    | 49.4111 |

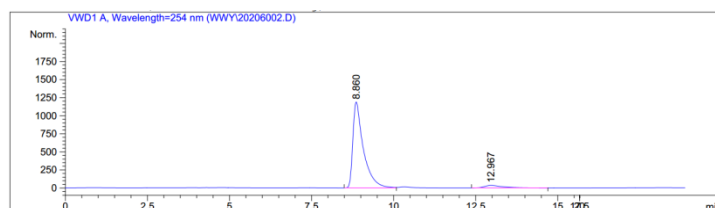

| Peak # | RetTime [min] | Type | Width [min] | Area mAU * s | Height [mAU] | Area %  |
|--------|---------------|------|-------------|--------------|--------------|---------|
| 1      | 8.860         | PV   | 0.3181      | 2.64283e4    | 1186.54785   | 95.4335 |
| 2      | 12.967        | BB   | 0.5522      | 1264.58777   | 33.30036     | 4.5665  |

## Compound 5ia

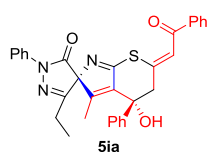

Prepared according to the procedure within 12 h as white solid (22.9 mg, 43% yield). mp 210.1-212.5 °C;  $[\alpha]_D^{15} = 30.00$  (*c* 0.20, CH<sub>2</sub>Cl<sub>2</sub>); <sup>1</sup>H NMR (400 MHz, Chloroform-*d*) δ 7.88 (t, *J* = 8.3 Hz, 4H), 7.54 (d, *J* = 7.7 Hz, 3H), 7.49-7.36 (m, 6H), 7.33 (d, *J* = 7.3 Hz, 1H), 7.21 (t, *J* = 7.4 Hz, 1H), 7.12 (s, 1H), 3.52 (d, *J* = 14.4 Hz, 1H), 3.23 (d, *J* = 14.5 Hz, 1H), 2.69 (s, 1H), 2.32-2.05 (m, 2H), 1.50 (s, 3H), 1.17 (t, *J* = 7.4 Hz, 3H); <sup>13</sup>C NMR (101 MHz, Chloroform-*d*) δ 188.6, 178.3, 166.2, 160.9, 154.4, 150.2, 141.8, 140.3, 137.8, 137.5, 133.0, 129.1, 128.9, 128.7, 128.4, 128.2, 125.6, 125.3, 120.7, 119.1, 94.2, 72.6, 51.5, 22.1, 12.0, 9.7. HRMS (ESI) *m/z* Calcd. for C<sub>32</sub>H<sub>28</sub>N<sub>3</sub>O<sub>3</sub>S ([M+H]<sup>+</sup>) 534.1846, Found 534.1840. Enantiomeric excess was determined to be 99% (determined by HPLC using chiral IC-H column, hexane/2-propanol = 7/3, λ = 254 nm, 30 °C, 0.8 mL/min, *t*<sub>major</sub> = 27.2 min, *t*<sub>minor</sub> = 46.6 min).

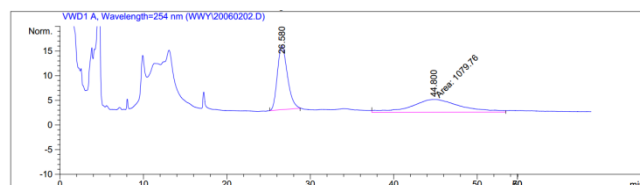

| Peak # | RetTime [min] | Type | Width [min] | Area mAU *s | Height [mAU] | Area %  |
|--------|---------------|------|-------------|-------------|--------------|---------|
| 1      | 26.580        | BB   | 1.1742      | 1089.03564  | 12.97706     | 50.2139 |
| 2      | 44.800        | MM   | 6.9614      | 1079.75720  | 2.58510      | 49.7861 |

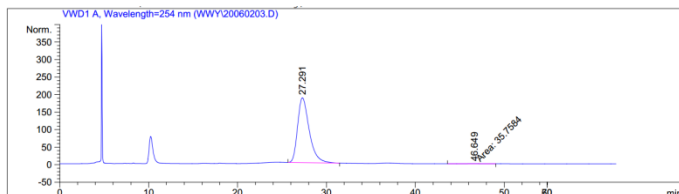

| Peak # | RetTime [min] | Type | Width [min] | Area mAU *s | Height [mAU] | Area %  |
|--------|---------------|------|-------------|-------------|--------------|---------|
| 1      | 27.291        | BB   | 1.3702      | 1.68408e4   | 185.08058    | 99.7881 |
| 2      | 46.649        | MM   | 2.6589      | 35.75836    | 2.24145e-1   | 0.2119  |

### Compound 5'ia

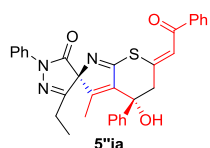

Prepared according to the procedure within 12 h as white solid (25.6 mg, 48% yield);  $[\alpha]_D^{17} = -95.45$  (c 0.21,  $\text{CH}_2\text{Cl}_2$ );  $^1\text{H NMR}$  (400 MHz, Chloroform-*d*)  $\delta$  7.84-7.74 (m, 4H), 7.50 (t,  $J = 7.9$  Hz, 1H), 7.43-7.26 (m, 10H), 7.17 (t,  $J = 7.5$  Hz, 1H), 6.98 (s, 1H), 4.48 (s, 1H), 3.50-3.14 (m, 2H), 2.34-2.06 (m, 2H), 1.62 (s, 3H), 1.20 (t,  $J = 7.4$  Hz, 3H);  $^{13}\text{C NMR}$  (101 MHz, Chloroform-*d*)  $\delta$  188.7, 179.4, 167.1, 161.2, 154.2, 150.4, 142.5, 141.8, 137.6, 137.5, 132.8, 128.9, 128.7, 128.6, 128.2, 128.0, 125.7, 125.2, 120.7, 119.3, 94.1, 72.5, 51.8, 22.1, 11.9, 9.7. HRMS (ESI)  $m/z$  Calcd. for  $\text{C}_{32}\text{H}_{28}\text{N}_3\text{O}_3\text{S}$  ( $[\text{M}+\text{H}]^+$ ) 534.1846, Found 534.1841. Enantiomeric excess was determined to be 87% (determined by HPLC using chiral AD-H column, hexane/2-propanol = 7/3,  $\lambda = 254$  nm, 30 °C, 0.8 mL/min,  $t_{\text{major}} = 12.7$  min,  $t_{\text{minor}} = 15.4$  min)

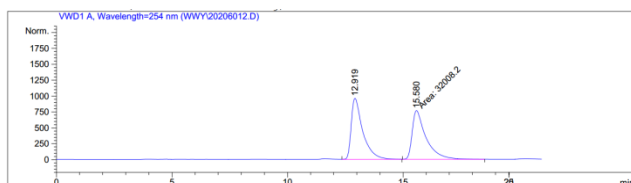

| Peak # | RetTime [min] | Type | Width [min] | Area mAU *s | Height [mAU] | Area %  |
|--------|---------------|------|-------------|-------------|--------------|---------|
| 1      | 12.919        | BV   | 0.5059      | 3.33652e4   | 960.15509    | 51.0379 |
| 2      | 15.580        | MM   | 0.6951      | 3.20082e4   | 767.47906    | 48.9621 |

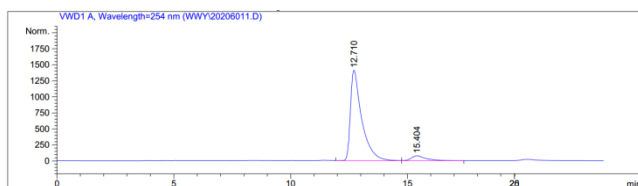

| Peak # | RetTime [min] | Type | Width [min] | Area mAU *s | Height [mAU] | Area %  |
|--------|---------------|------|-------------|-------------|--------------|---------|
| 1      | 12.710        | VV   | 0.4817      | 4.75162e4   | 1410.82031   | 93.4251 |
| 2      | 15.404        | VB   | 0.6425      | 3344.02271  | 75.85223     | 6.5749  |

### Compound 5ja

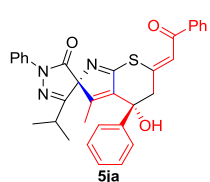

Prepared according to the procedure within 12 h as white solid (22.4 mg, 41% yield). Enantiomeric excess was determined to be 97% (determined by HPLC using chiral AD-H column, hexane/2-propanol = 7/3,  $\lambda = 254$  nm, 30 °C, 0.8 mL/min,  $t_{\text{major}} = 18.4$  min,  $t_{\text{minor}} = 25.8$  min).

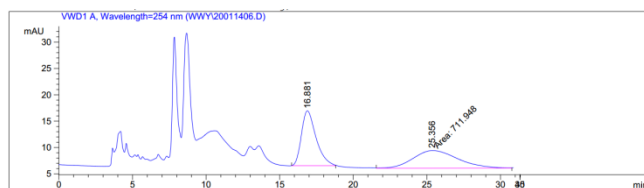

| Peak # | RetTime [min] | Type | Width [min] | Area mAU *s | Height [mAU] | Area %  |
|--------|---------------|------|-------------|-------------|--------------|---------|
| 1      | 16.881        | BB   | 0.9755      | 720.17621   | 10.41609     | 50.2873 |
| 2      | 25.356        | MM   | 3.5387      | 711.94775   | 3.35318      | 49.7127 |

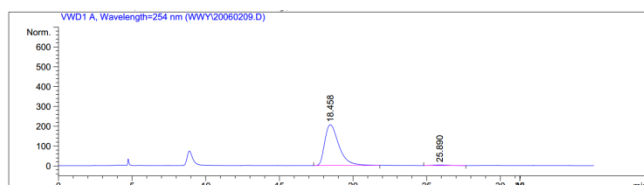

| Peak # | RetTime [min] | Type | Width [min] | Area mAU *s | Height [mAU] | Area %  |
|--------|---------------|------|-------------|-------------|--------------|---------|
| 1      | 18.458        | BB   | 1.0257      | 1.36831e4   | 205.91396    | 98.5628 |
| 2      | 25.890        | BP   | 0.8667      | 199.52203   | 2.84346      | 1.4372  |

### Compound 5<sup>''</sup>ja

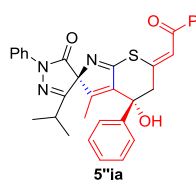

Prepared according to the procedure within 12 h as white solid (25.2 mg, 46%);

$[\alpha]_D^{17} = -45.65$  (*c* 0.18,  $\text{CH}_2\text{Cl}_2$ );  $^1\text{H NMR}$  (400 MHz,  $\text{CHCl}_3$ )  $\delta$  7.85-7.76 (m, 4H), 7.50 (t, *J* = 7.4 Hz, 1H), 7.46-7.36 (m, 4H), 7.40-7.30 (m, 4H), 7.33-7.25 (m, 1H), 7.18 (t, *J* = 7.4 Hz, 1H), 6.98 (s, 1H), 4.99-4.50 (m, 1H), 3.39 (d, *J* = 13.1 Hz, 1H), 3.30 (d, *J* = 13.8 Hz, 1H), 2.44 (hept, *J* = 6.9 Hz, 1H), 1.62 (s, 3H),

1.21 (d, *J* = 6.9 Hz, 3H), 1.13 (d, *J* = 6.9 Hz, 3H);  $^{13}\text{C NMR}$  (101 MHz,  $\text{CHCl}_3$ )  $\delta$  188.7, 179.1, 167.1, 164.5, 154.6, 150.6, 142.6, 141.7, 137.6, 137.5, 132.8, 128.9, 128.6, 128.6, 128.2, 128.0, 125.8, 125.2, 120.7, 119.3, 94.2, 72.3, 51.8, 29.9, 20.1, 20.1, 12.1. HRMS (ESI) *m/z* Calcd. for  $\text{C}_{33}\text{H}_{30}\text{N}_3\text{O}_3\text{S}$  ( $[\text{M}+\text{H}]^+$ ) 548.2002, Found 548.1999. Enantiomeric excess was determined to be 89% (determined by HPLC using chiral IC-H column, hexane/2-propanol = 7/3,  $\lambda$  = 254 nm, 30 °C, 0.8 mL/min, *t*<sub>major</sub> = 10.1 min, *t*<sub>minor</sub> = 12.1 min).

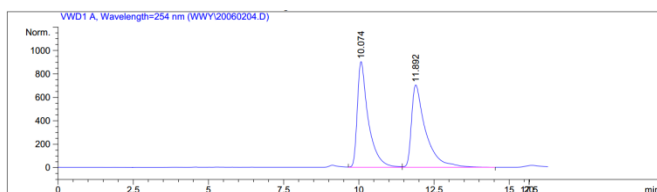

| Peak # | RetTime [min] | Type | Width [min] | Area mAU *s | Height [mAU] | Area %  |
|--------|---------------|------|-------------|-------------|--------------|---------|
| 1      | 10.074        | VV   | 0.3641      | 2.28609e4   | 902.03802    | 49.9216 |
| 2      | 11.892        | VB   | 0.4651      | 2.29327e4   | 702.79700    | 50.0784 |

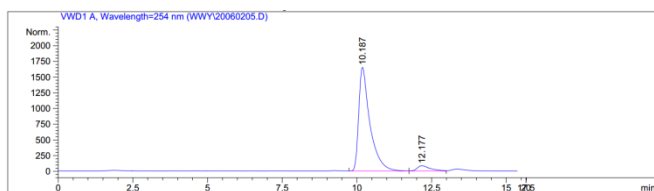

| Peak # | RetTime [min] | Type | Width [min] | Area mAU *s | Height [mAU] | Area %  |
|--------|---------------|------|-------------|-------------|--------------|---------|
| 1      | 10.187        | VV   | 0.3758      | 4.31372e4   | 1653.03088   | 94.1296 |
| 2      | 12.177        | VV   | 0.4530      | 2690.27319  | 86.19263     | 5.8704  |

### Compound 5af

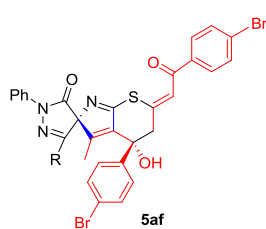

Prepared according to the procedure within 12 h as yellow solid (33.2 mg, 45% yield). Enantiomeric excess was determined to be 99% (determined by HPLC using chiral IC-H column, hexane/2-propanol = 7/3,  $\lambda = 254$  nm, 30 °C, 0.8 mL/min,  $t_{\text{major}} = 18.7$  min,  $t_{\text{minor}} = 12.0$  min).

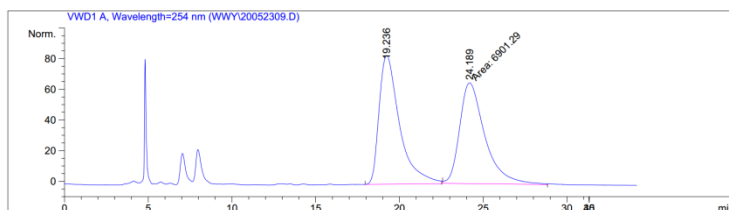

| Peak # | RetTime [min] | Type | Width [min] | Area mAU   | *s | Height [mAU] | Area %  |
|--------|---------------|------|-------------|------------|----|--------------|---------|
| 1      | 19.236        | BB   | 1.2638      | 7142.44043 |    | 83.91729     | 50.8586 |
| 2      | 24.189        | MM   | 1.7495      | 6901.29004 |    | 65.74348     | 49.1414 |

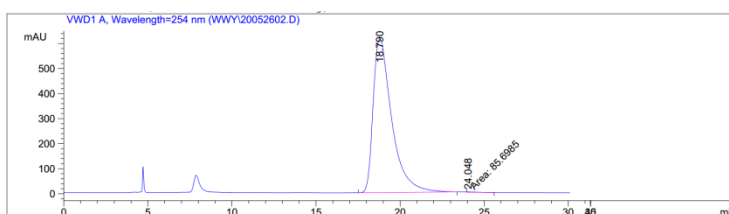

| Peak # | RetTime [min] | Type | Width [min] | Area mAU  | *s | Height [mAU] | Area %  |
|--------|---------------|------|-------------|-----------|----|--------------|---------|
| 1      | 18.790        | PB   | 1.1531      | 4.71063e4 |    | 614.80127    | 99.8184 |
| 2      | 24.048        | MM   | 0.9664      | 85.69849  |    | 1.47800      | 0.1816  |

### Compound 5''af

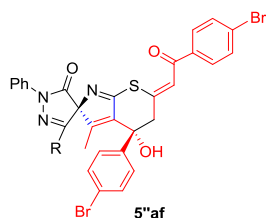

Prepared according to the procedure within 12 h as yellow solid (31.8 mg, 43% yield). Enantiomeric excess was determined to be 91% (determined by HPLC using chiral IC-H column, hexane/2-propanol = 7/3,  $\lambda = 254$  nm, 30 °C, 0.8 mL/min,  $t_{\text{major}} = 48.8$  min,  $t_{\text{minor}} = 21.0$  min).

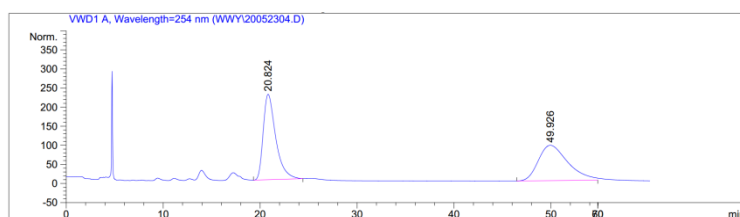

| Peak # | RetTime [min] | Type | Width [min] | Area mAU  | *s | Height [mAU] | Area %  |
|--------|---------------|------|-------------|-----------|----|--------------|---------|
| 1      | 20.824        | PB   | 1.3558      | 2.00852e4 |    | 223.79175    | 50.0028 |
| 2      | 49.926        | BB   | 2.8964      | 2.00830e4 |    | 92.89378     | 49.9972 |



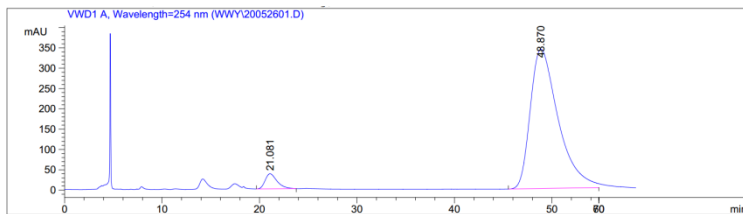

| Peak # | RetTime [min] | Type | Width [min] | Area mAU *s | Height [mAU] | Area %  |
|--------|---------------|------|-------------|-------------|--------------|---------|
| 1      | 21.081        | PB   | 1.2695      | 3168.61621  | 37.12518     | 4.3693  |
| 2      | 48.870        | BB   | 2.9657      | 6.93518e4   | 343.47601    | 95.6307 |

### Synthesis of compound 6 and 7

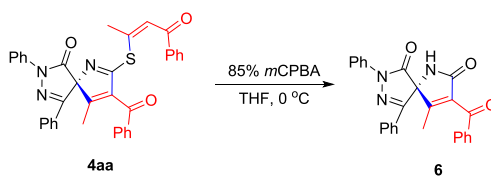

To a solution of **4aa** (58.1 mg, 0.1 mmol, 1.0 equiv) in THF (1.0 mL) was added 85% *m*CPBA (42.6 mg, 0.21 mmol, 2.1 equiv) at 0 °C. The reaction mixture was stirred at 0 °C for 2 h. And then the mixture was diluted with EtOAc (10 mL) and quenched with saturated NaHCO<sub>3</sub> aqueous (5 mL). The organic phase was separated and washed with saturated NaHCO<sub>3</sub> aqueous and brine, dried over Na<sub>2</sub>SO<sub>4</sub>, concentrated. The crude mixture was purified by column chromatography on silica gel (EtOAc/petroleum ether = 1/5) to give **6** as light-yellow oil (32.6 mg, 81% yield).  $[\alpha]_D^{16} = -37.00$  (*c* 0.12, CH<sub>2</sub>Cl<sub>2</sub>); <sup>1</sup>H NMR (600 MHz, Chloroform-*d*) δ 7.91 (d, *J* = 8.0 Hz, 2H), 7.88 - 7.80 (m, 2H), 7.74 - 7.66 (m, 2H), 7.48 (t, *J* = 7.6 Hz, 1H), 7.44 - 7.29 (m, 8H), 7.21 (t, *J* = 7.5 Hz, 1H), 1.78 (s, 3H); <sup>13</sup>C NMR (151 MHz, Chloroform-*d*) δ 190.2, 171.5, 167.3, 157.3, 153.6, 137.4, 136.1, 134.6, 134.3, 131.8, 129.8, 129.4, 129.2, 128.9, 128.8, 126.3, 126.1, 74.5, 12.0. HRMS (ESI) *m/z* Calcd. for C<sub>26</sub>H<sub>20</sub>N<sub>3</sub>O<sub>3</sub> ([M+H]<sup>+</sup>) 422.1499, Found 422.1498. Enantiomeric excess was determined to be 99% (determined by HPLC using chiral OD-H column, hexane/2-propanol = 7/3, λ = 254 nm, 30 °C, 0.8 mL/min, *t*<sub>major</sub> = 10.0 min, *t*<sub>minor</sub> = 22.4 min).

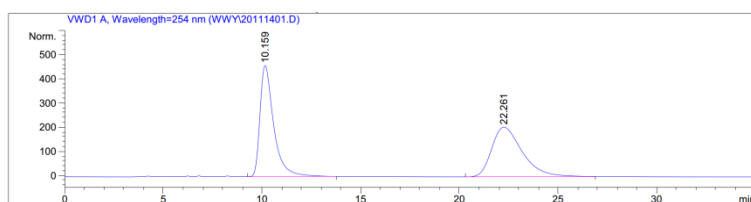

| Peak # | RetTime [min] | Type | Width [min] | Area mAU *s | Height [mAU] | Area %  |
|--------|---------------|------|-------------|-------------|--------------|---------|
| 1      | 10.159        | VB   | 0.7226      | 2.22356e4   | 460.00241    | 50.1360 |
| 2      | 22.261        | BB   | 1.6363      | 2.21150e4   | 205.37311    | 49.8640 |

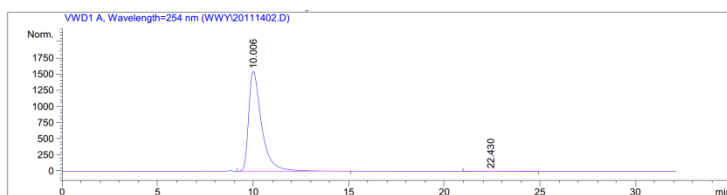

| Peak # | RetTime [min] | Type | Width [min] | Area mAU *s | Height [mAU] | Area %  |
|--------|---------------|------|-------------|-------------|--------------|---------|
| 1      | 10.006        | VB   | 0.7030      | 7.28335e4   | 1544.61096   | 99.5775 |
| 2      | 22.430        | BB   | 1.2104      | 309.05127   | 3.00423      | 0.4225  |

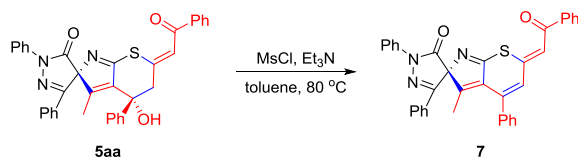

Methanesulfonyl chloride (12.5 mg, 0.11 mmol) and then triethylamine (11.1 mg, 0.11 mmol) were added to a solution of **5aa** (58.1 mg 0.1 mmol) in toluene (2 mL). This mixture was refluxed for 2 h and then poured into saturated aqueous ammonium chloride (5 mL). After separation of the organic layer, the aqueous phase was extracted with ethyl acetate. The combined organic phase was dried over magnesium sulfate. After evaporation of the solvents, the residue was purified by column chromatography on silica gel (petroleum ether/EtOAc = 10:1 was used as the eluent) to give **7** as yellow solid (44 mg, 1.17 mmol). mp 115.0 - 117.5 °C;  $[\alpha]_D^{16} = 215.70$  ( $c$  0.14,  $\text{CH}_2\text{Cl}_2$ );  $^1\text{H NMR}$  (600 MHz,  $\text{Chloroform-}d$ )  $\delta$  8.00 (d,  $J = 7.7$  Hz, 2H), 7.96 (d,  $J = 8.0$  Hz, 2H), 7.58 (t,  $J = 7.4$  Hz, 1H), 7.50 (dd,  $J = 8.0, 3.8$  Hz, 4H), 7.44 (t,  $J = 8.0$  Hz, 3H), 7.42 (d,  $J = 6.2$  Hz, 3H), 7.37 (t,  $J = 7.6$  Hz, 3H), 7.33 (s, 1H), 7.29 (s, 1H), 7.24 (d,  $J = 7.7$  Hz, 1H), 6.64 (s, 1H), 1.43 (s, 3H);  $^{13}\text{C NMR}$  (151 MHz,  $\text{Chloroform-}d$ )  $\delta$  189.1, 177.7, 165.6, 155.8, 154.1, 147.8, 140.9, 138.1, 137.8, 137.7, 132.9, 131.2, 131.1, 130.2, 129.3, 129.0, 129.0, 128.8, 128.7, 128.1, 125.9, 119.8, 119.2, 94.0, 13.2. HRMS (ESI)  $m/z$  Calcd. for  $\text{C}_{36}\text{H}_{26}\text{N}_3\text{O}_2\text{S}$  ( $[\text{M}+\text{H}]^+$ ) 564.1740, Found 564.1741. Enantiomeric excess was determined to be 96% (determined by HPLC using chiral OD-H column, hexane/2-propanol = 7/3,  $\lambda = 254$  nm, 30 °C, 0.8 mL/min,  $t_{\text{major}} = 10.4$  min,  $t_{\text{minor}} = 9.4$  min).

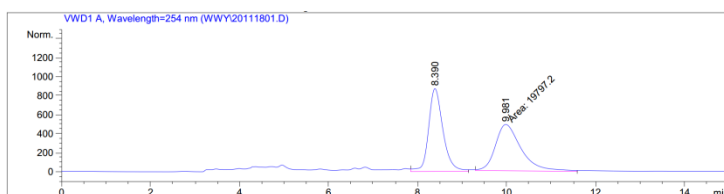

| Peak # | RetTime [min] | Type | Width [min] | Area mAU *s | Height [mAU] | Area %  |
|--------|---------------|------|-------------|-------------|--------------|---------|
| 1      | 8.390         | VV   | 0.3406      | 1.96862e4   | 872.00726    | 49.8595 |
| 2      | 9.981         | MM   | 0.6765      | 1.97972e4   | 487.70041    | 50.1405 |

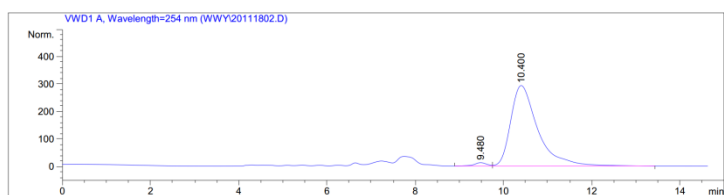

| Peak # | RetTime [min] | Type | Width [min] | Area mAU *s | Height [mAU] | Area %  |
|--------|---------------|------|-------------|-------------|--------------|---------|
| 1      | 9.480         | BV   | 0.3067      | 255.01266   | 12.48582     | 1.9938  |
| 2      | 10.400        | VB   | 0.6398      | 1.25356e4   | 293.32022    | 98.0062 |

### 3. X-ray structures of 5af and 5''af

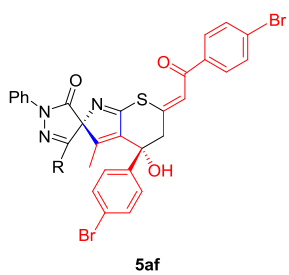

≡

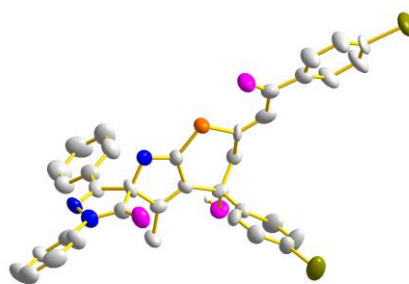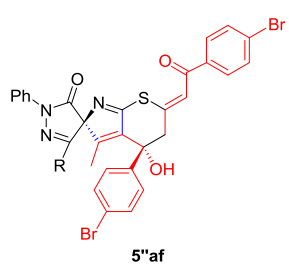

≡

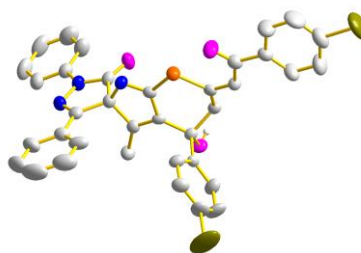

#### 4. References

- (1) X. Bao, S. Wei, X. Qian, J. Qu, B. Wang, L. Zou and G. Ge, Asymmetric Construction of a Multi-Pharmacophore-Containing Dispirotriheterocyclic Scaffold and Identification of a Human Carboxylesterase 1 Inhibitor. *Org. Lett.* 2018, **20**, 3394-3398.
- (2) (a) X. Zhang, X. Jia, L. Fang, N. Liu, J. Wang and X. Fan, Tandem Reactions of 1,2-Allenic Ketones Leading to Substituted Benzenes and  $\alpha,\beta$ -Unsaturated Nitriles. *Org. Lett.* 2011, **13**, 5024-5027; (b) H. Xu, X. Zhang, Y. He, S. Guo and X. Fan, Tandem reaction of 3-hydroxyhexa-4,5-allenic esters: a novel access to diversely substituted 2H-pyran-2-ones and indenenes. *Chem. Commun.* 2012, **48**, 3121-3123.
- (3) (a) W. Yang and D.-M. Du, Highly Enantioselective Michael Addition of Nitroalkanes to Chalcones Using Chiral Squaramides as Hydrogen Bonding Organocatalysts. *Org. Lett.* 2010, **12**, 5450-5453; (b) J. P. Malerich, K. Hagihara and V. H. Rawal, Chiral Squaramide Derivatives are Excellent Hydrogen Bond Donor Catalysts. *J. Am. Chem. Soc.* 2008, **130**, 14416-14417.

## 5. NMR spectra for compounds

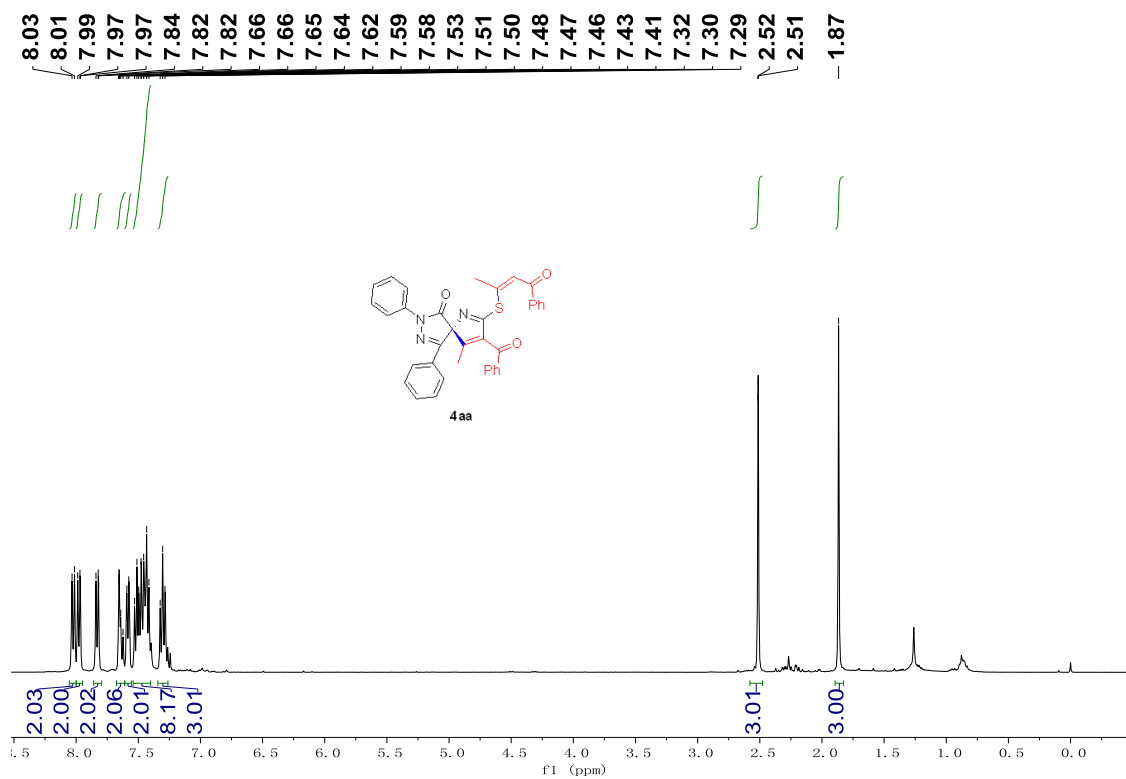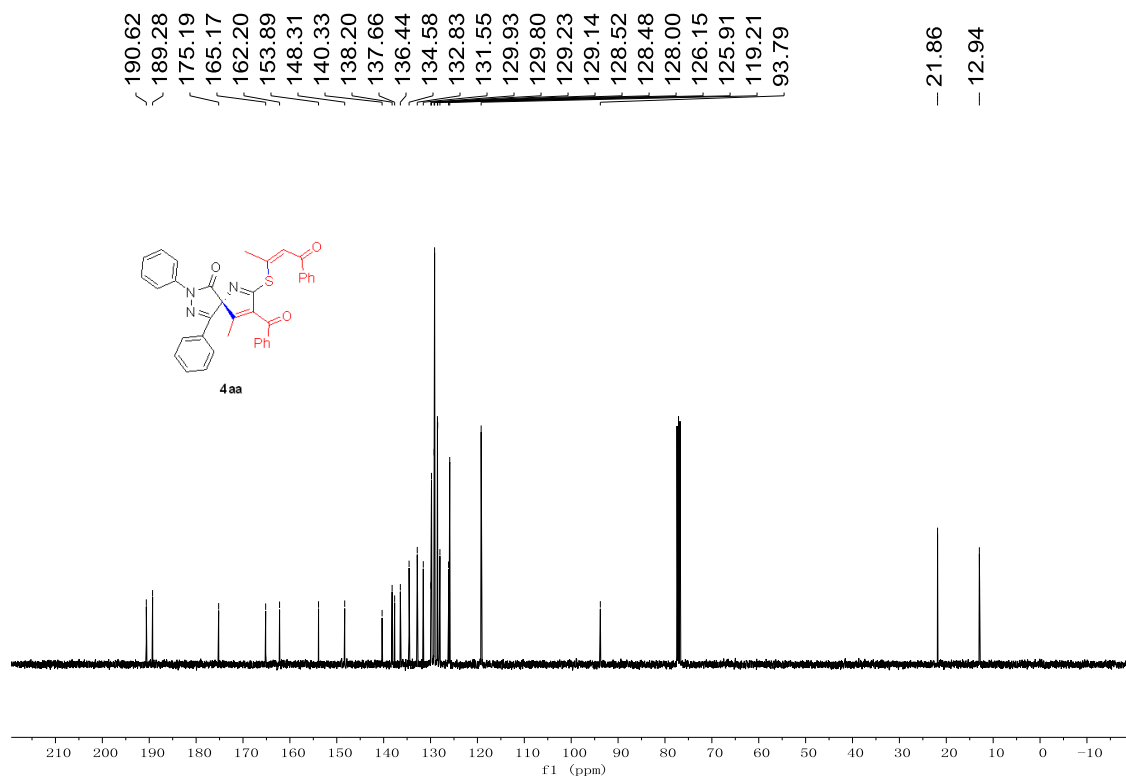

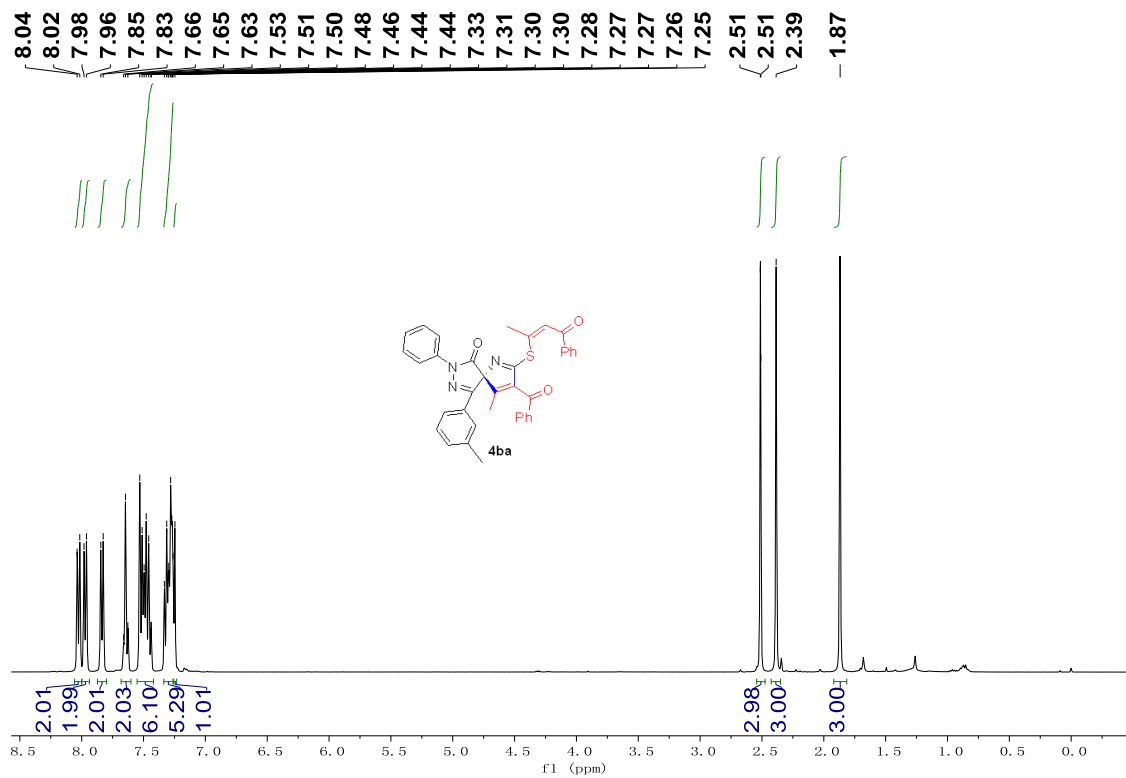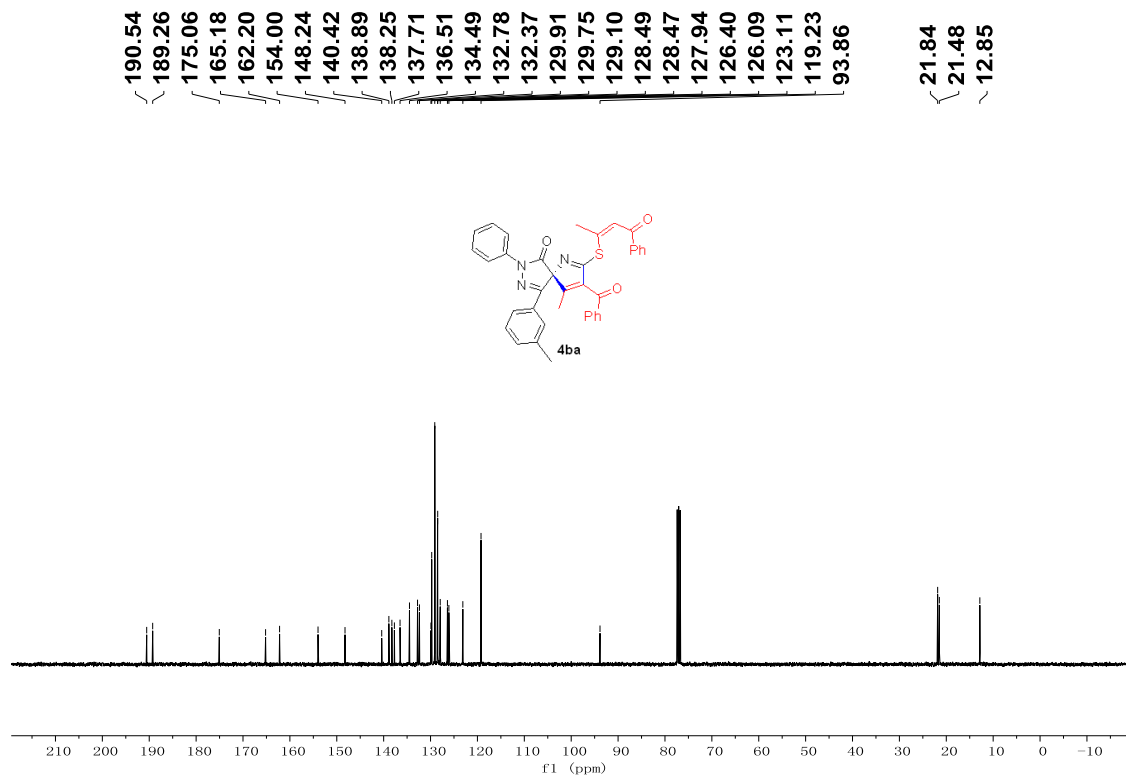

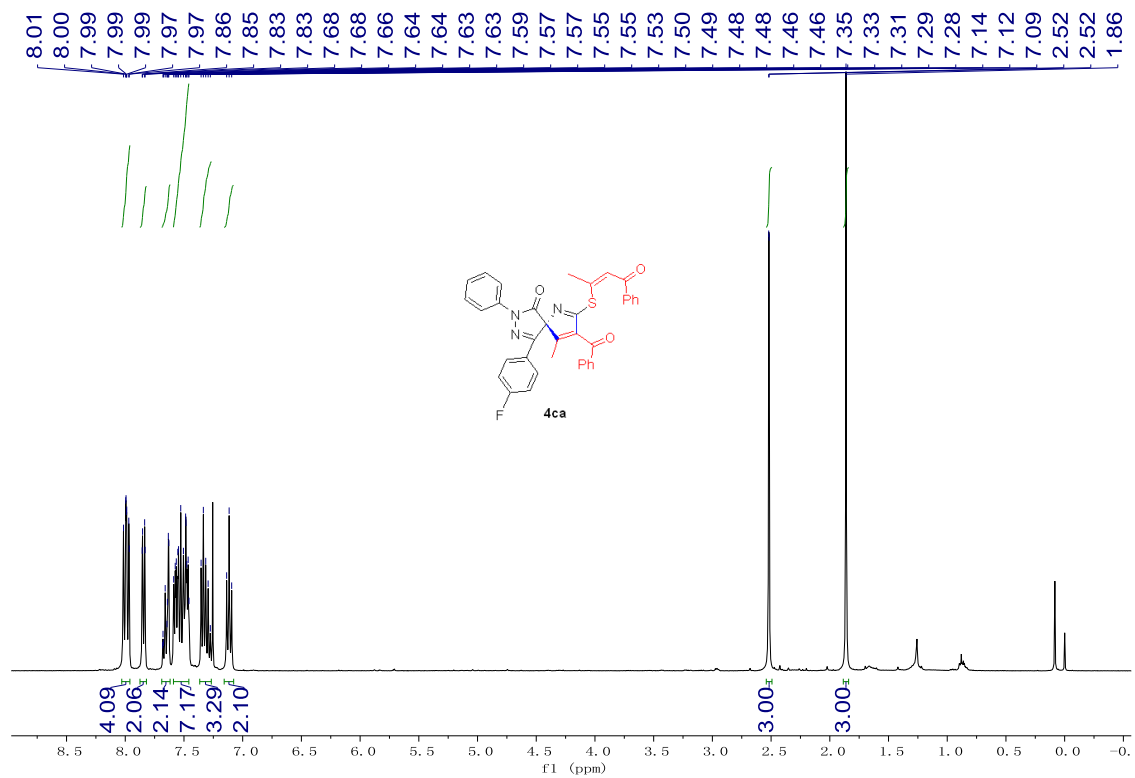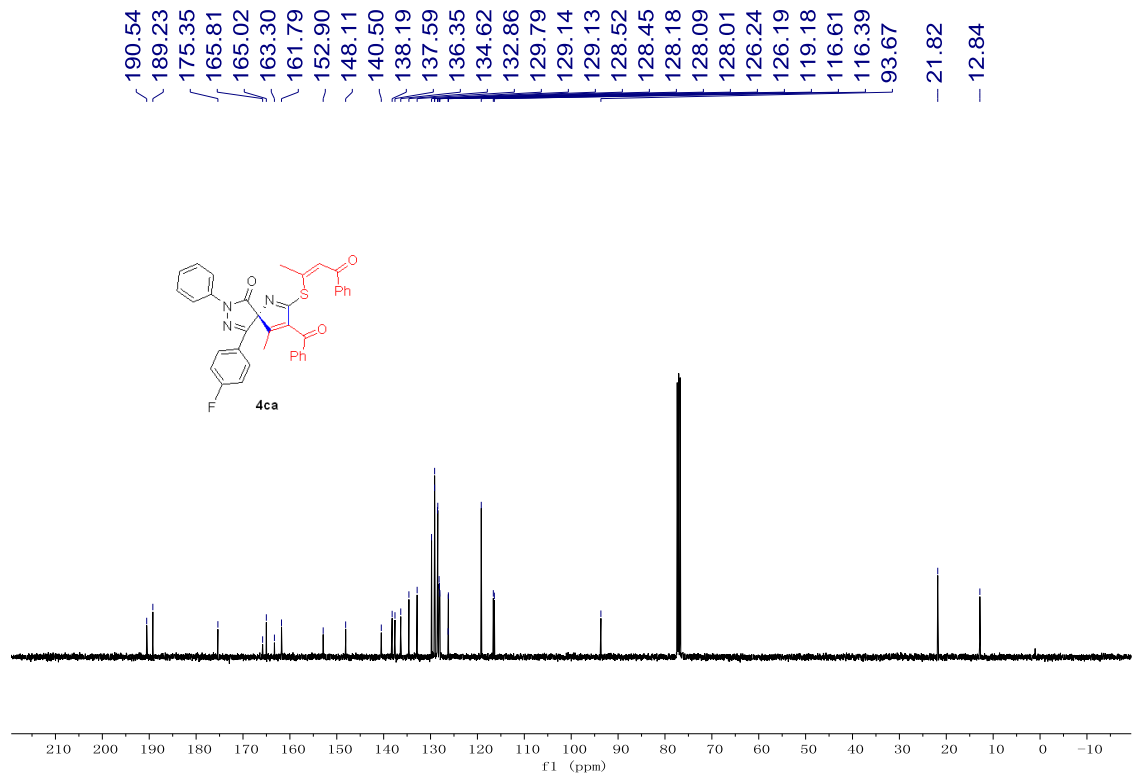

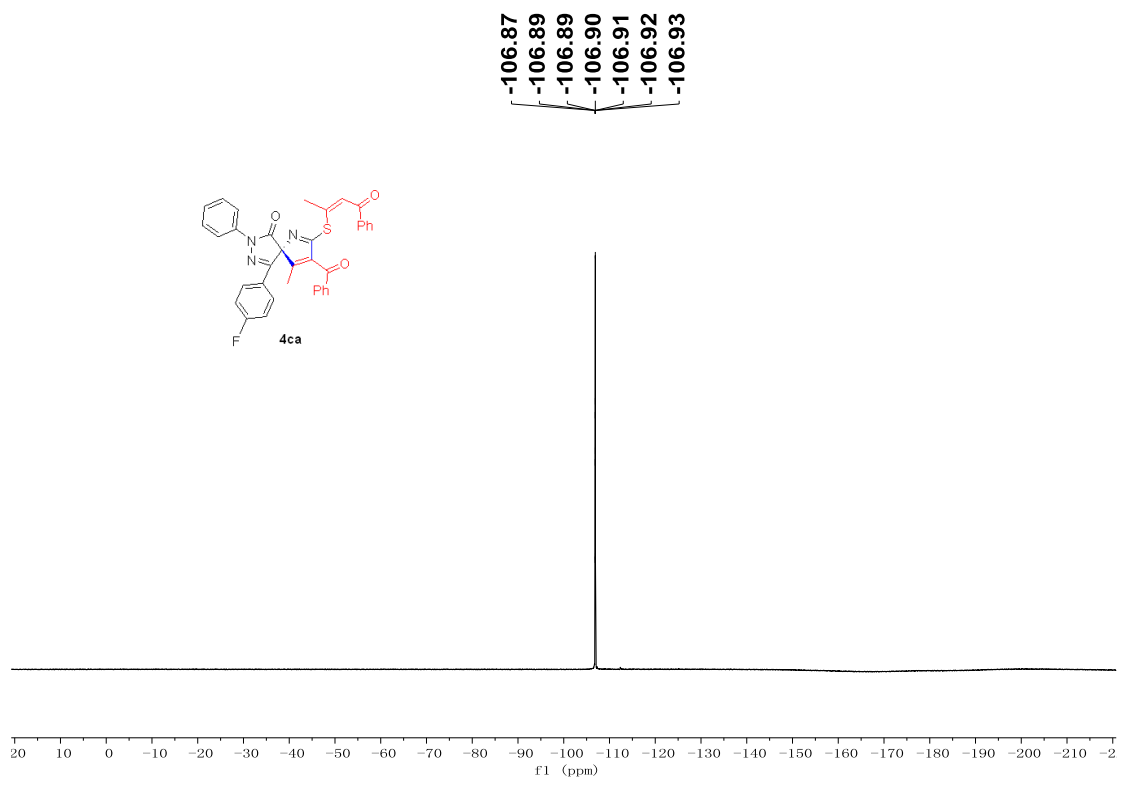





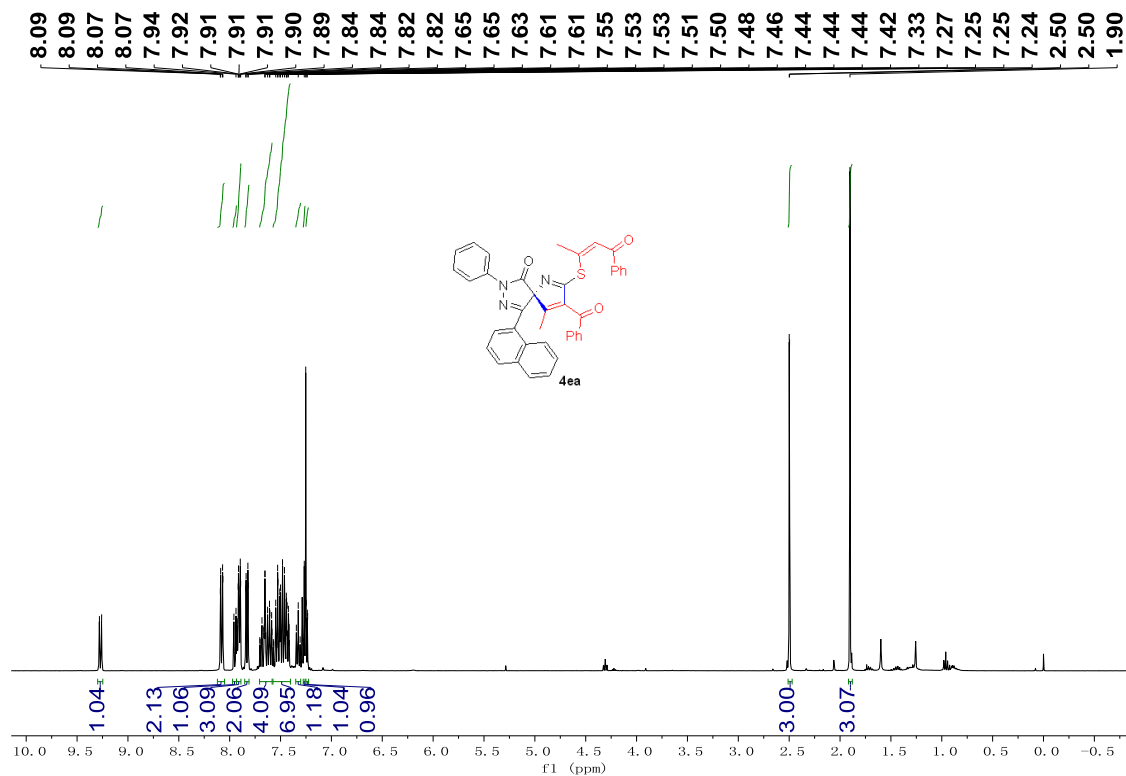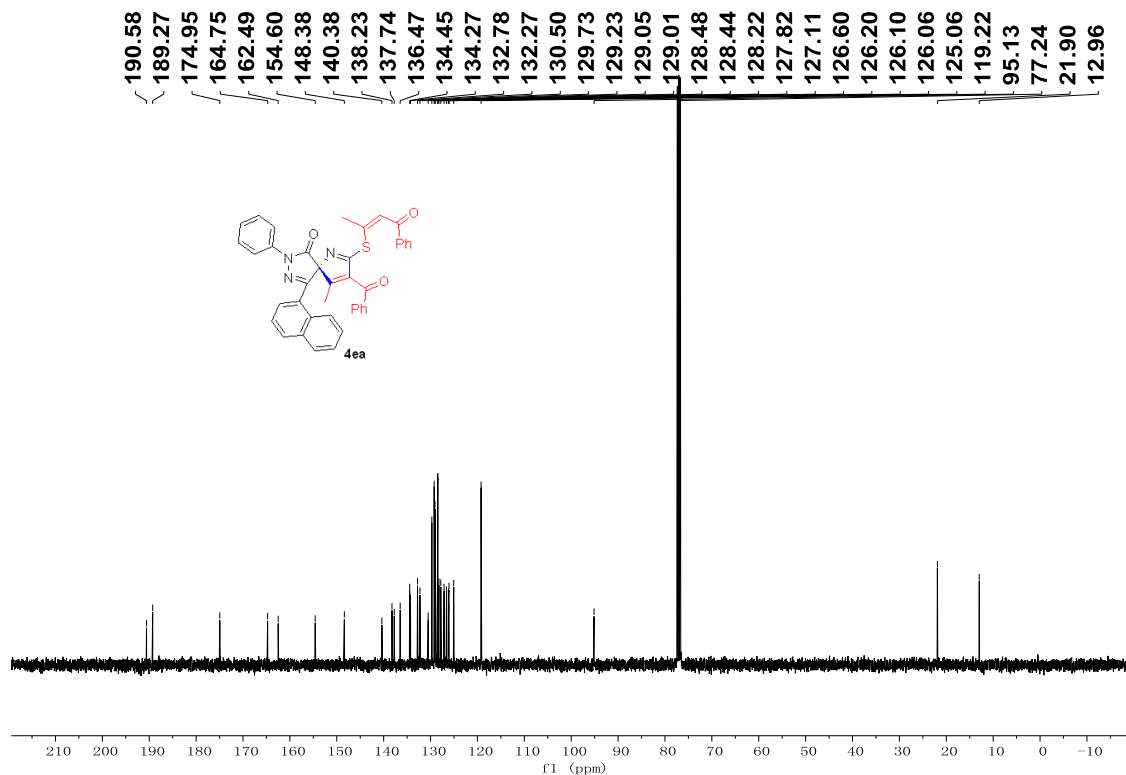

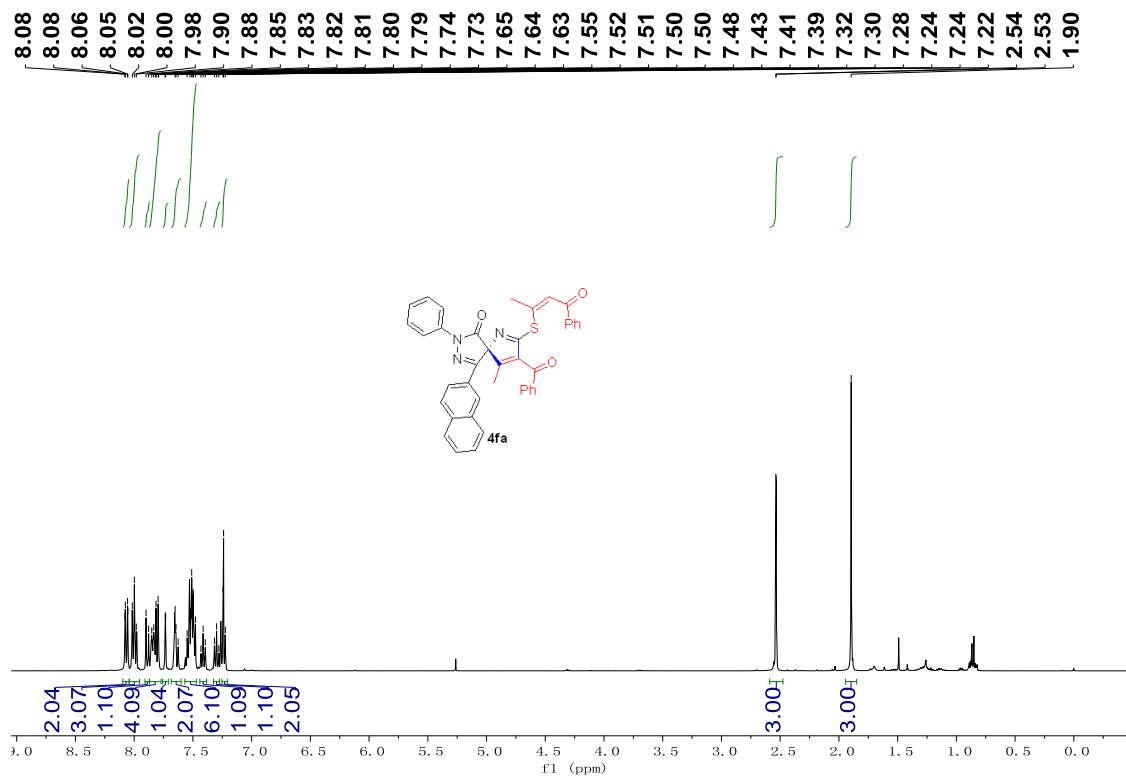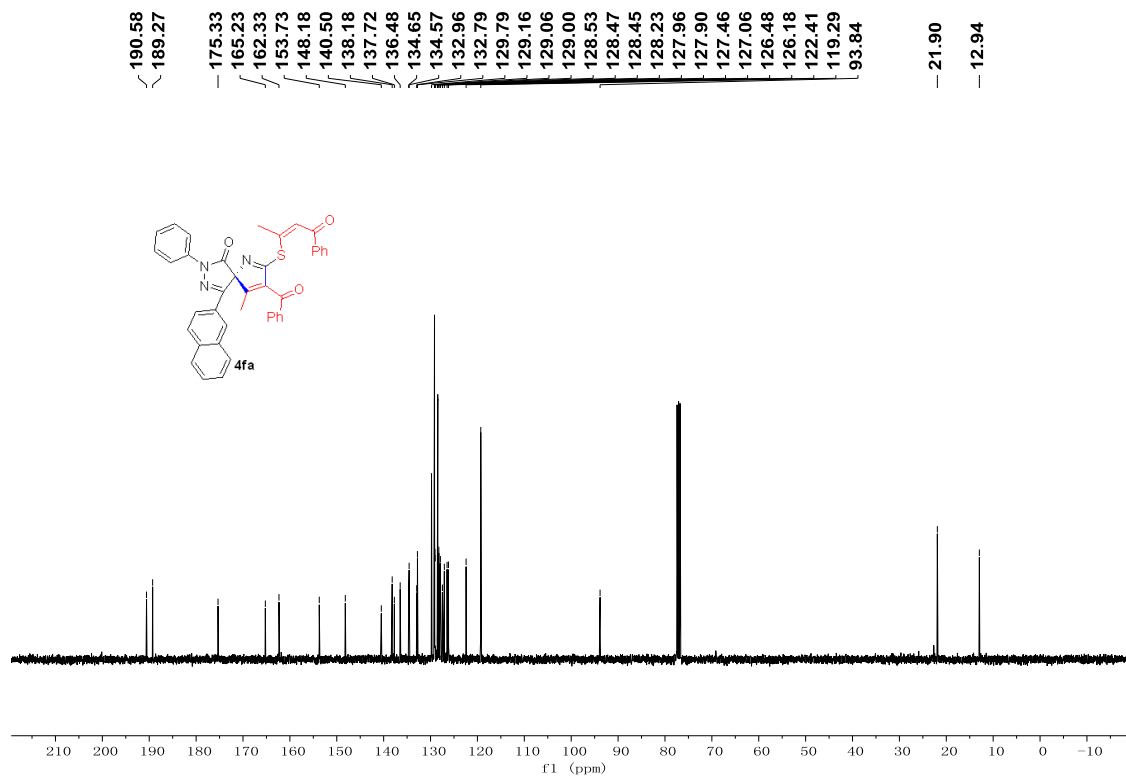

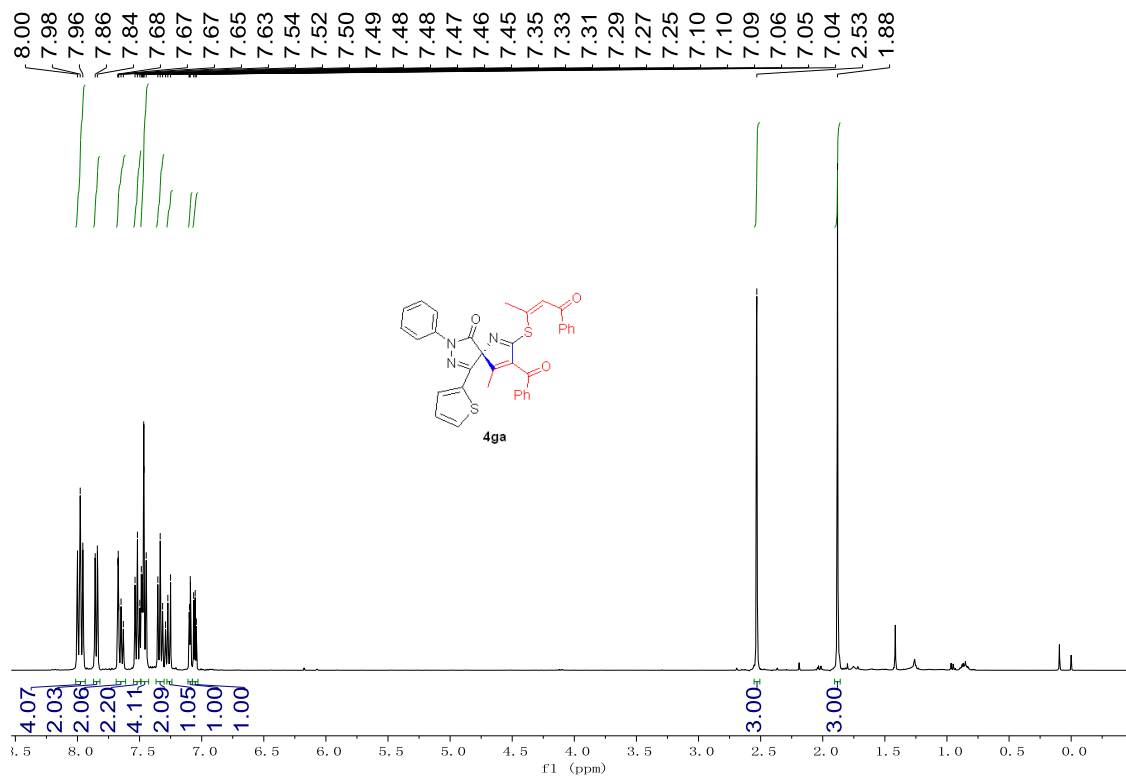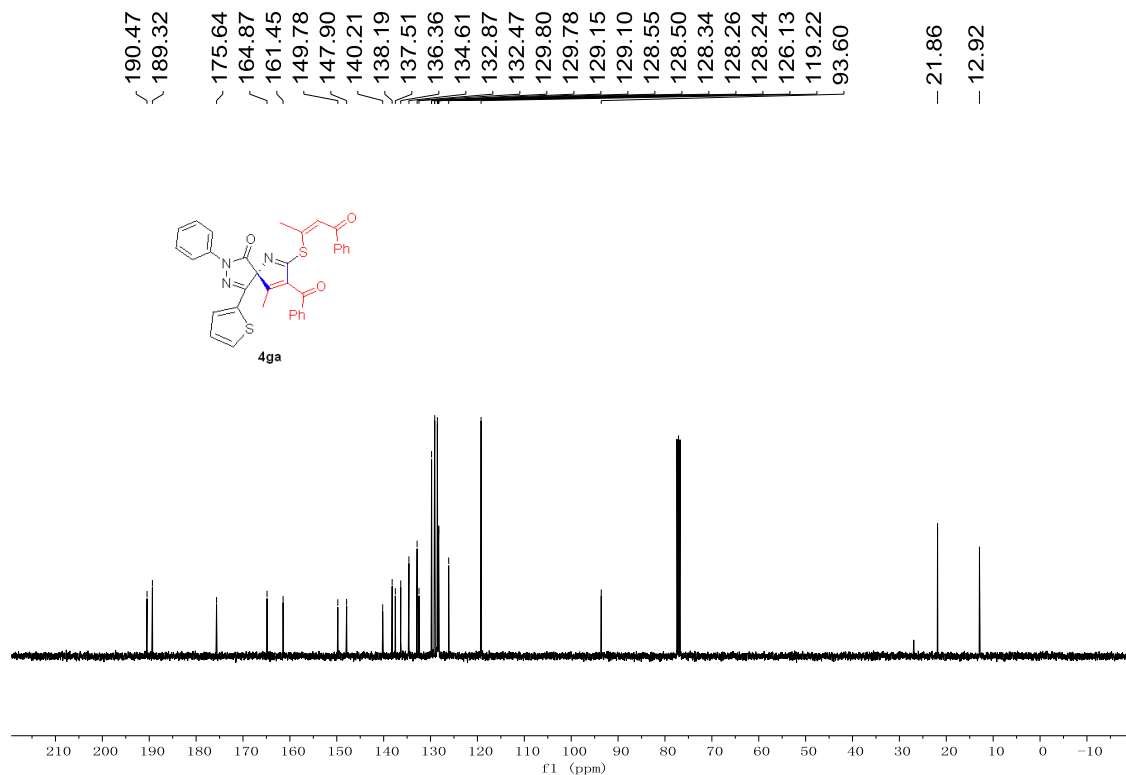

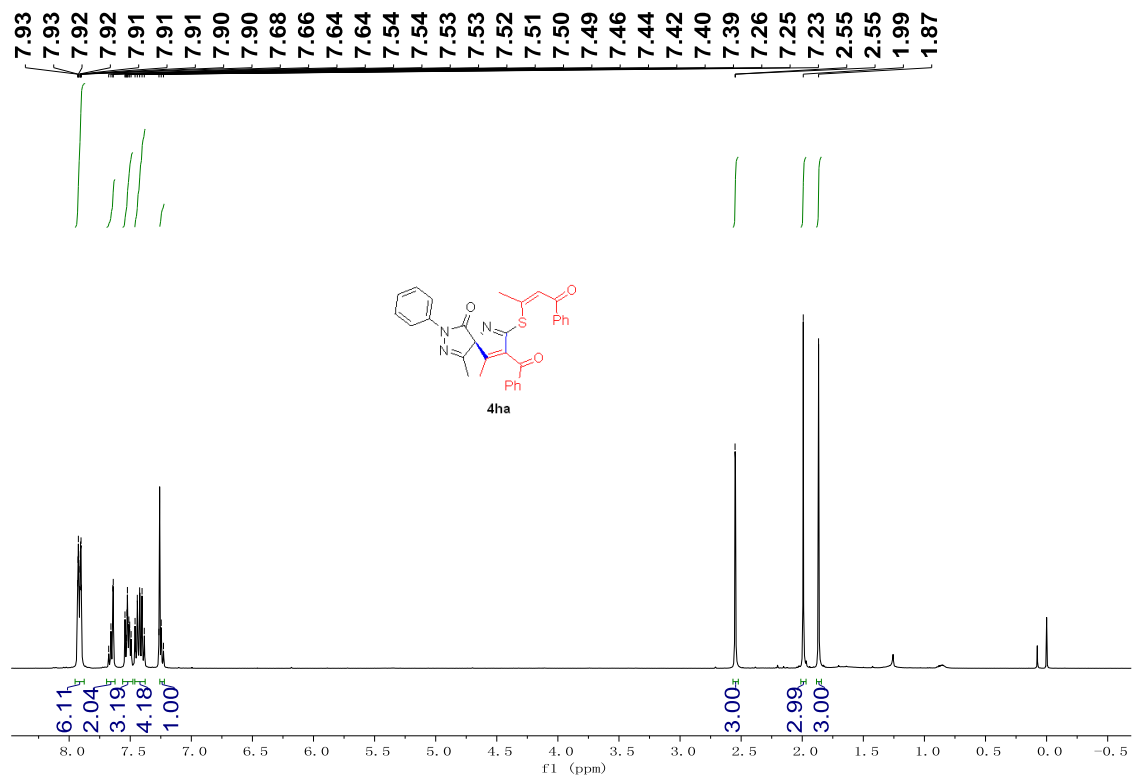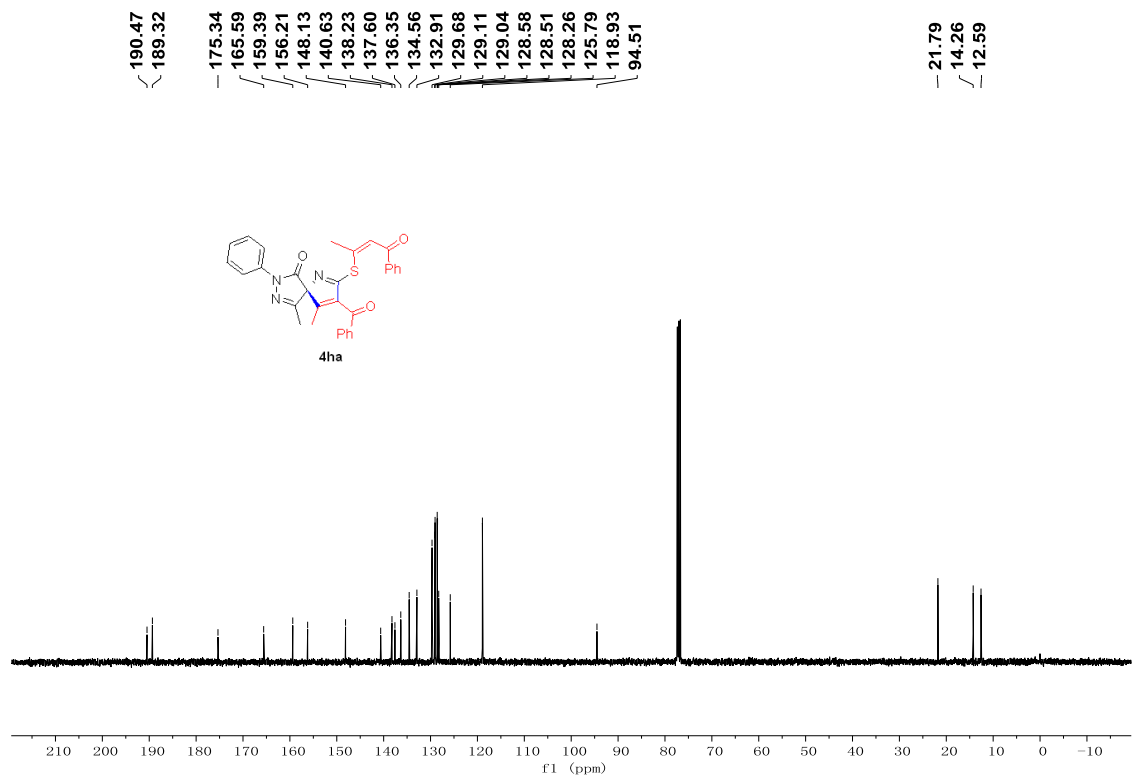



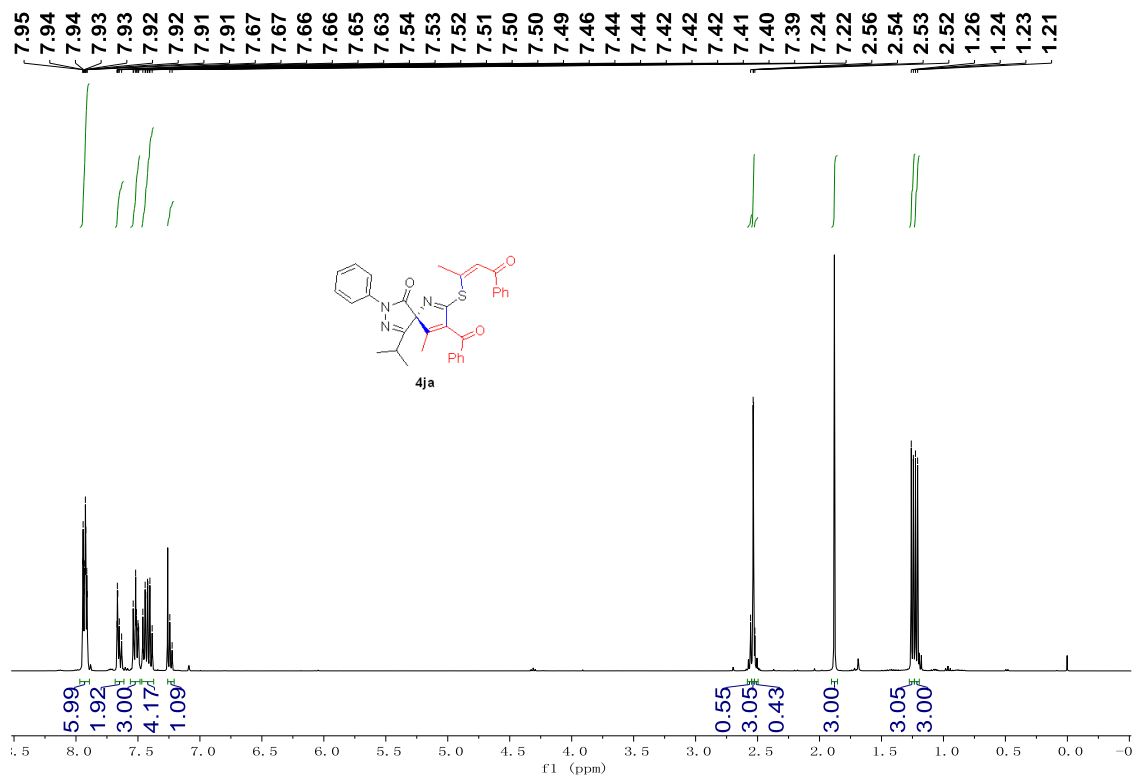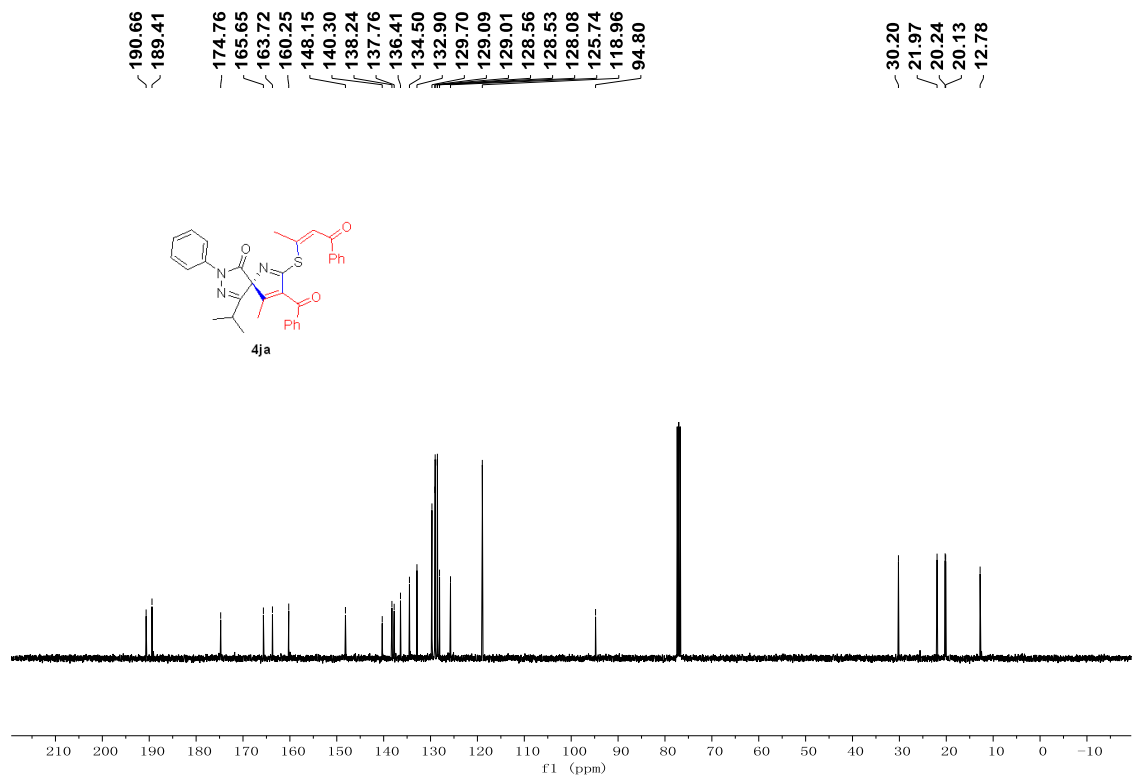

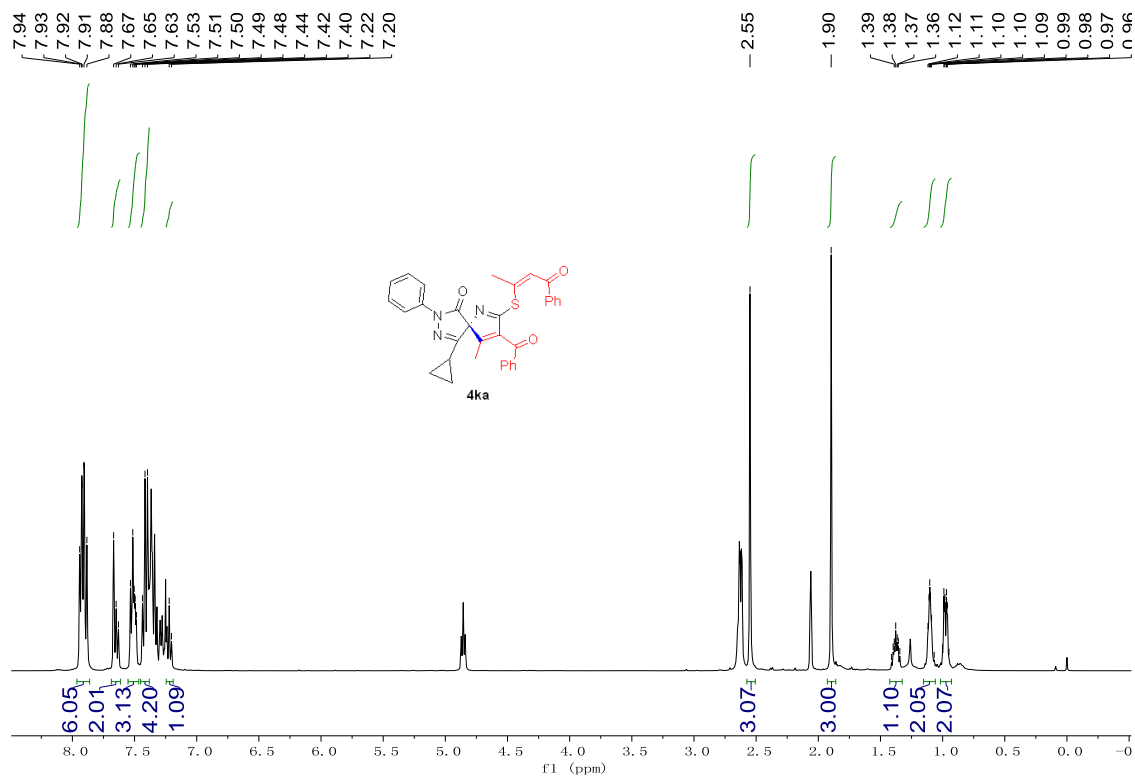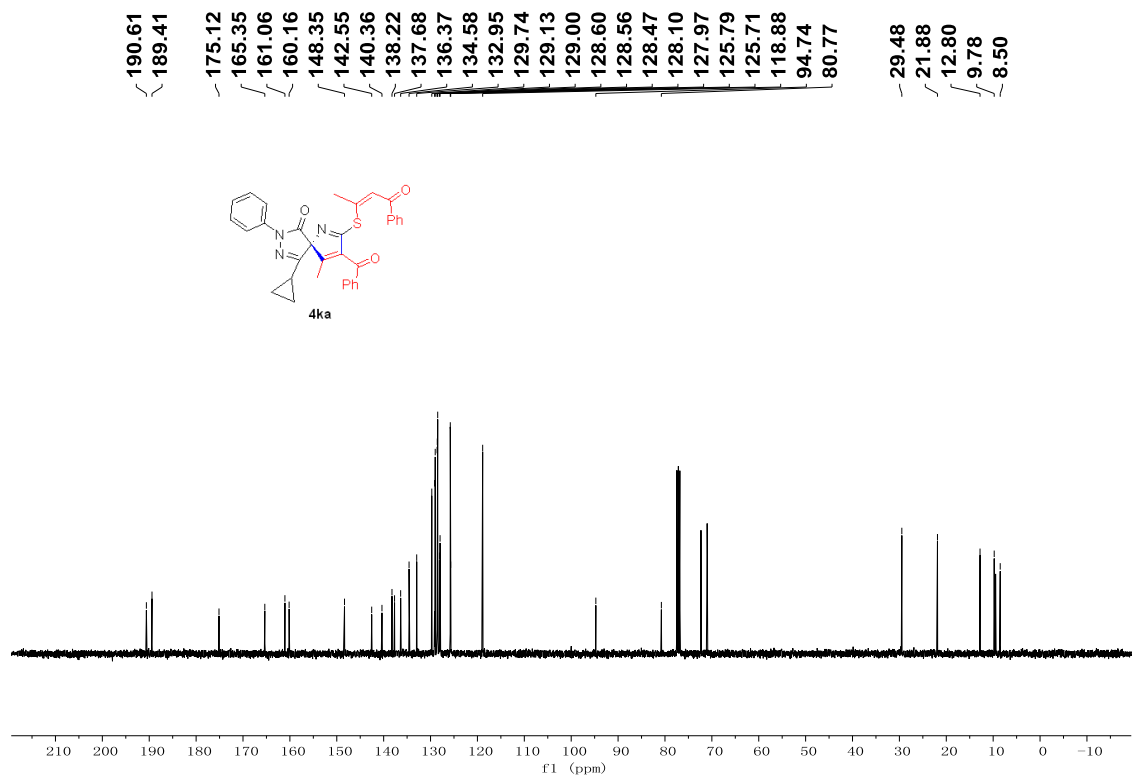



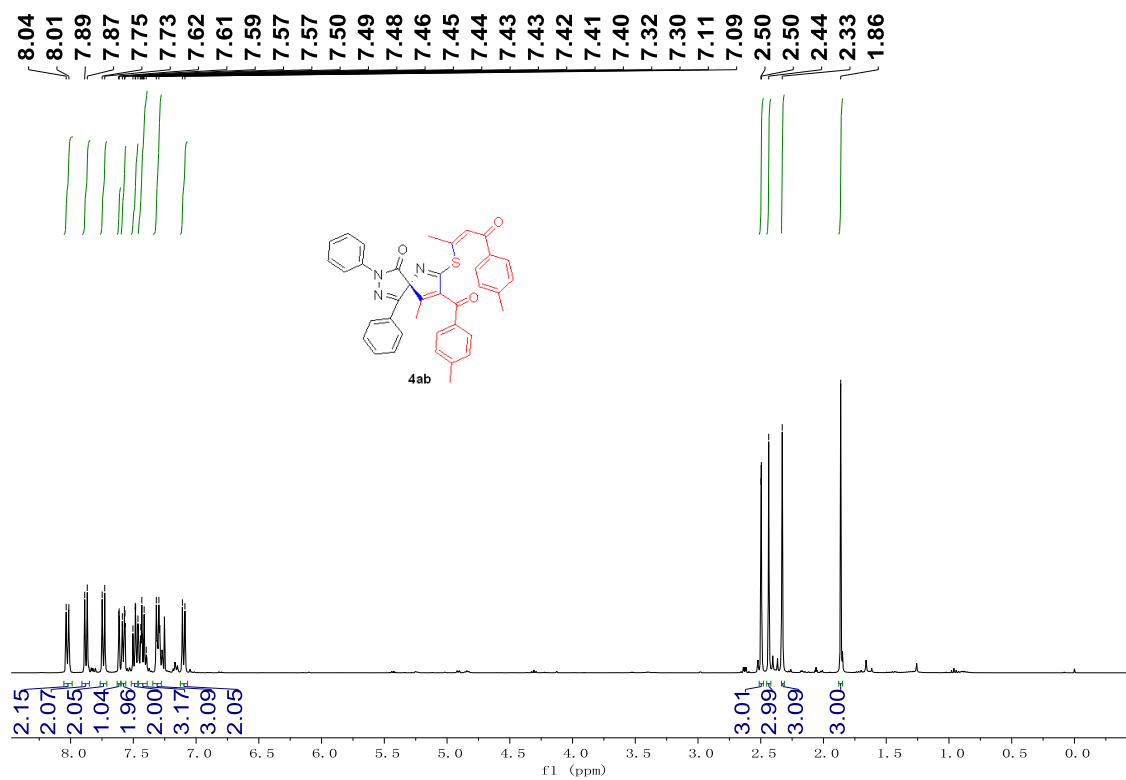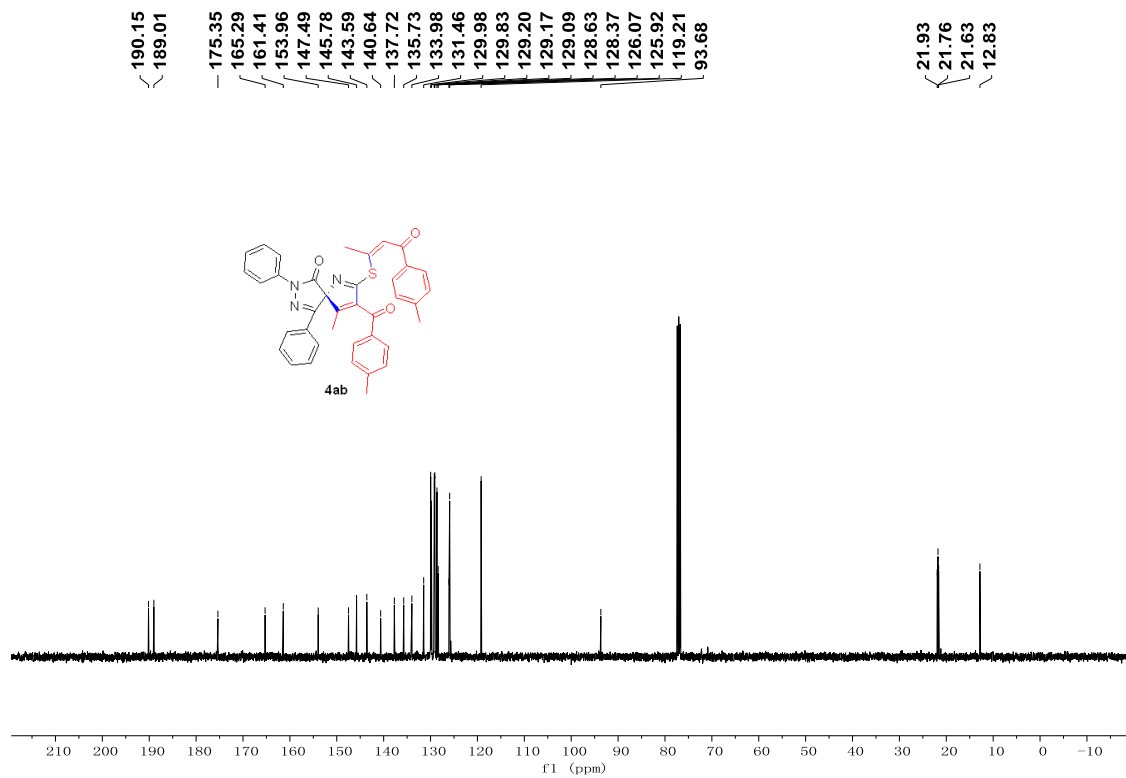

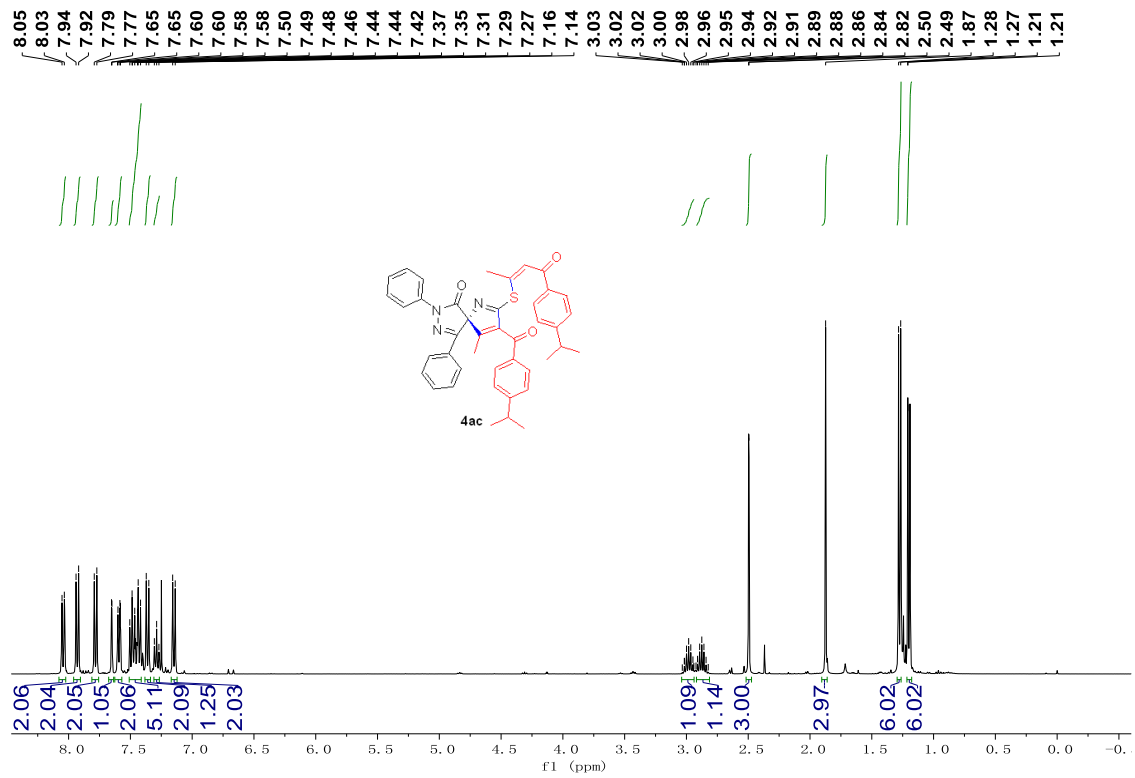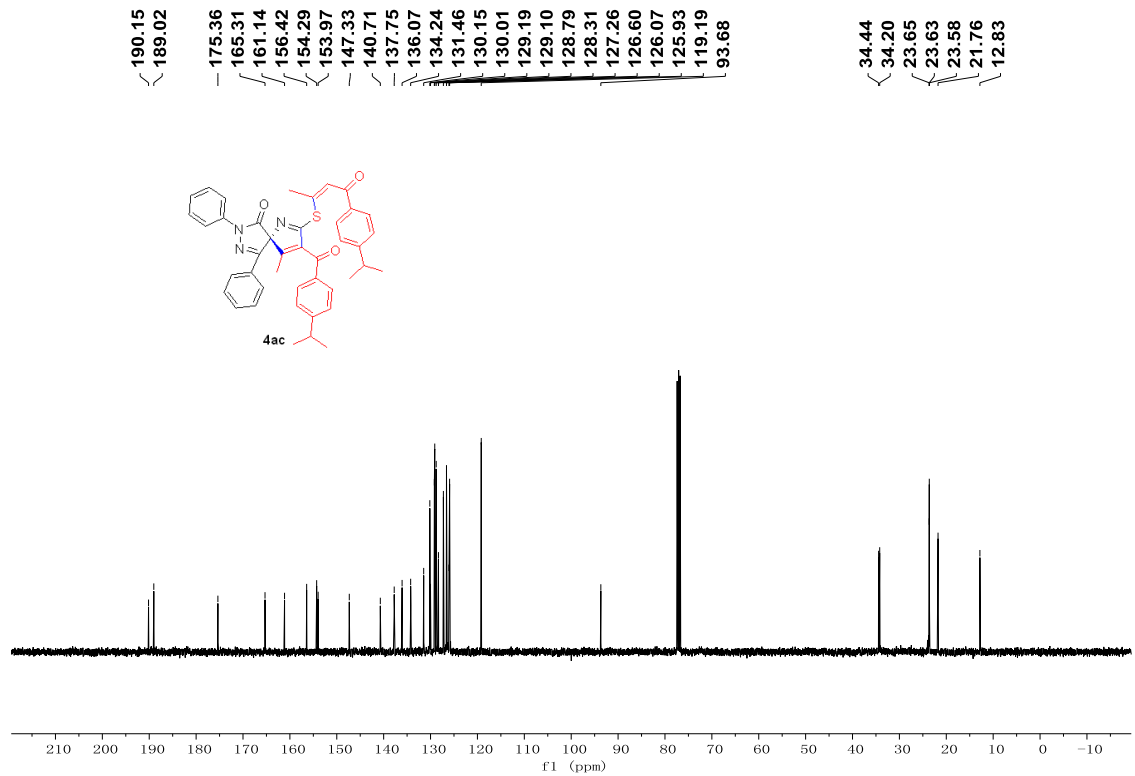

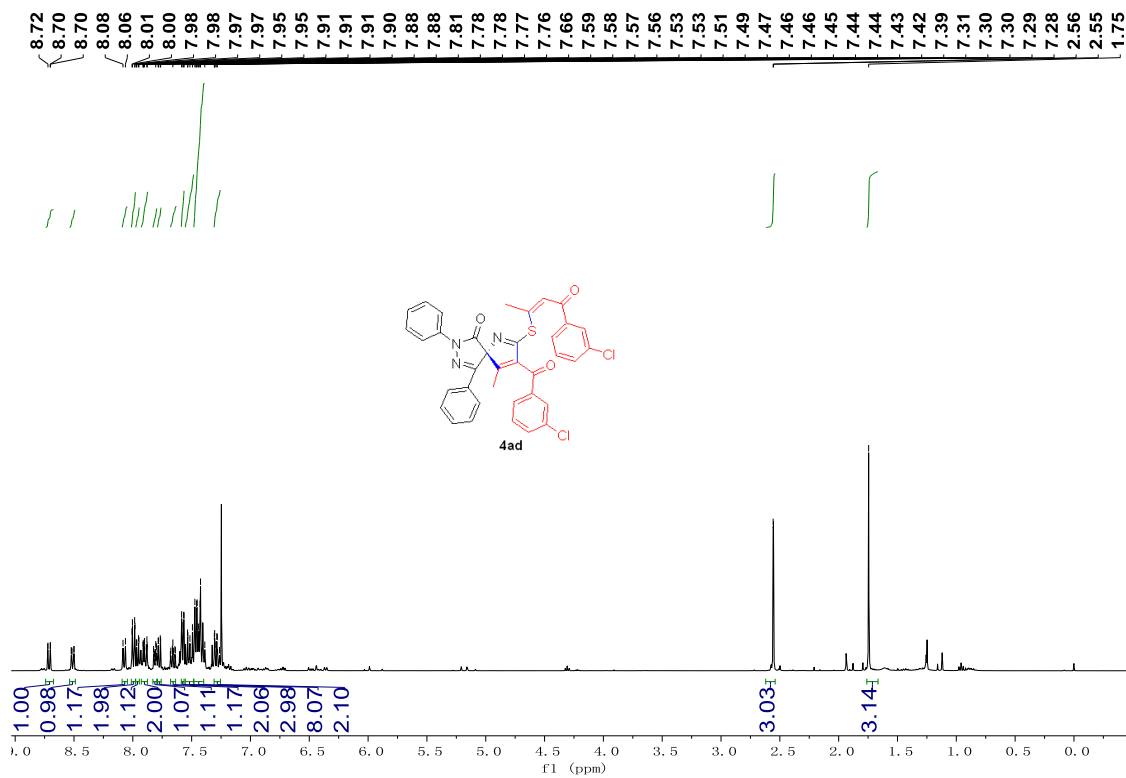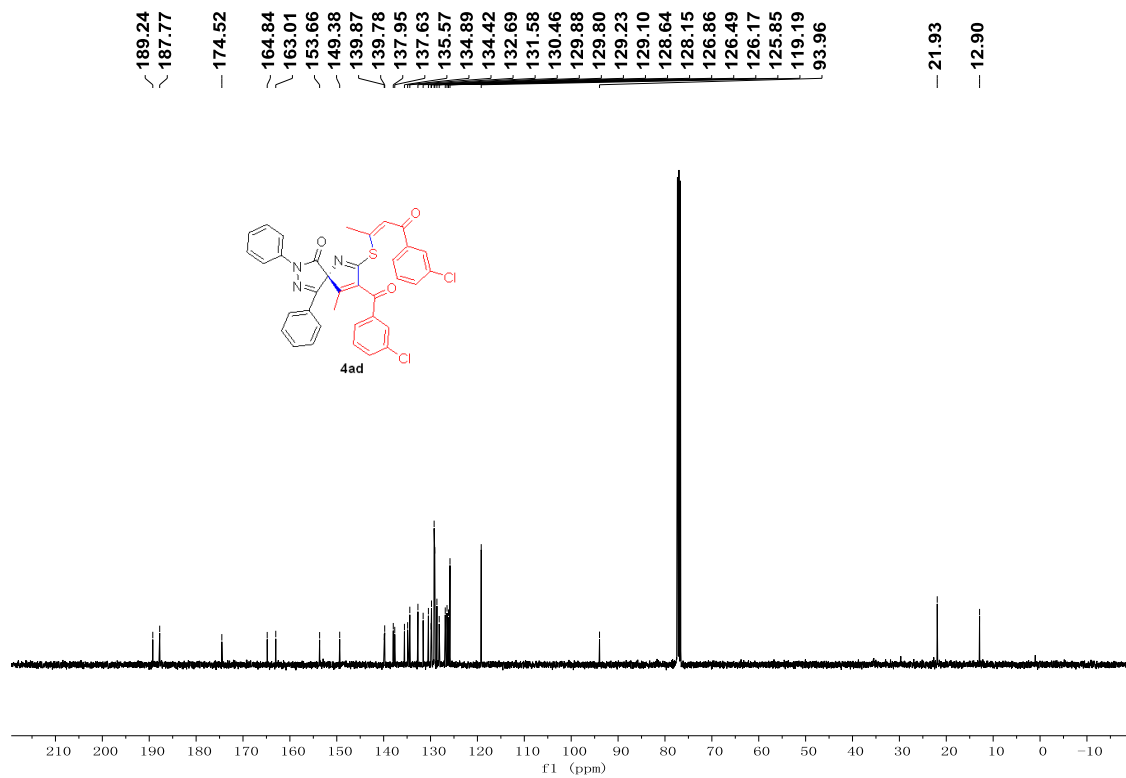

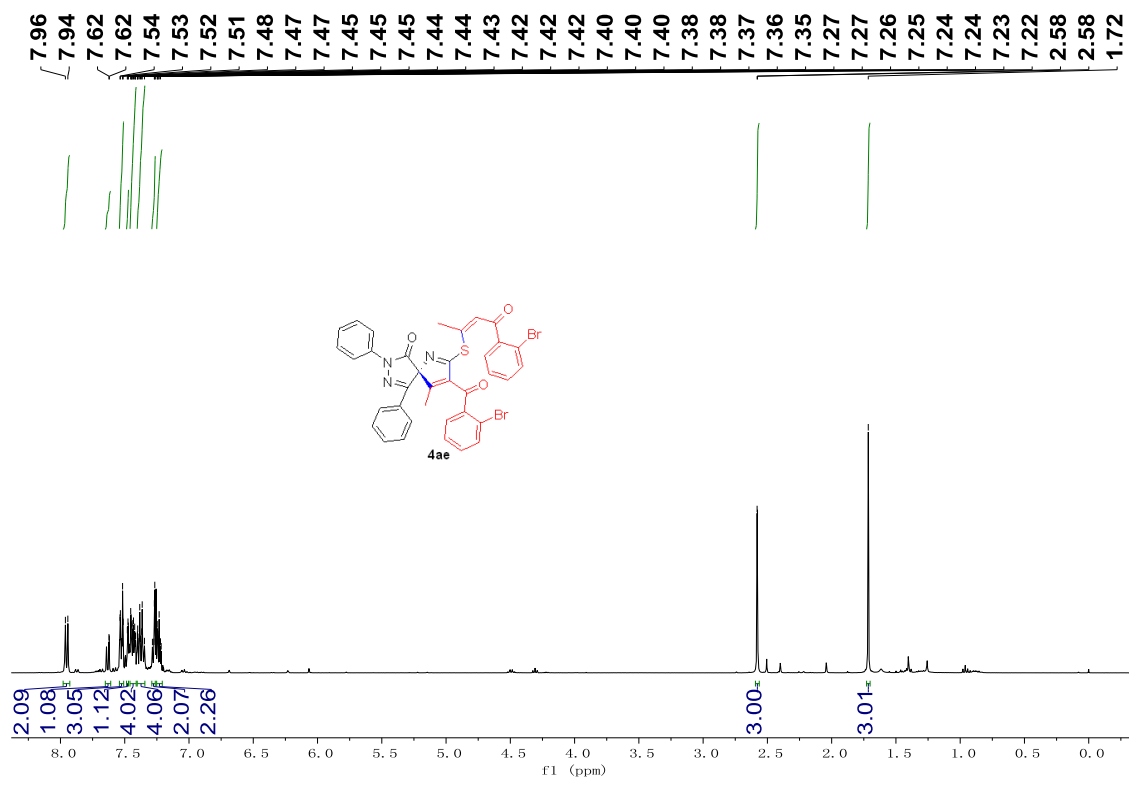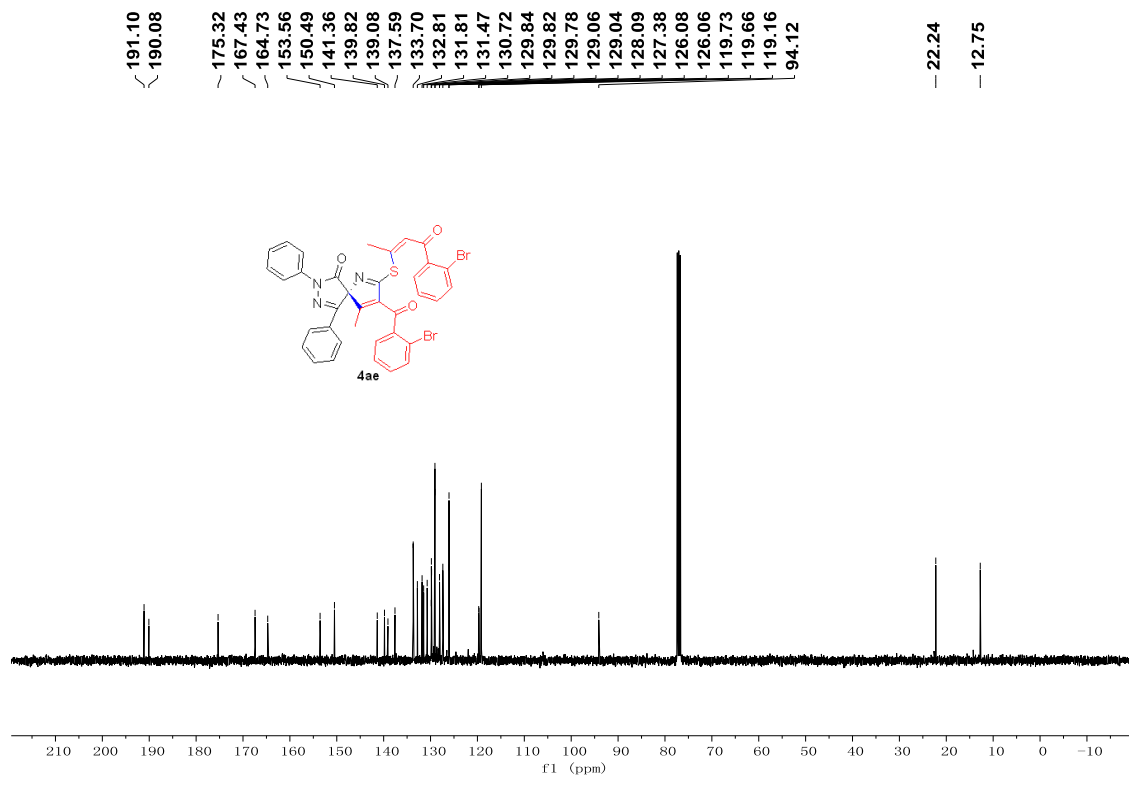

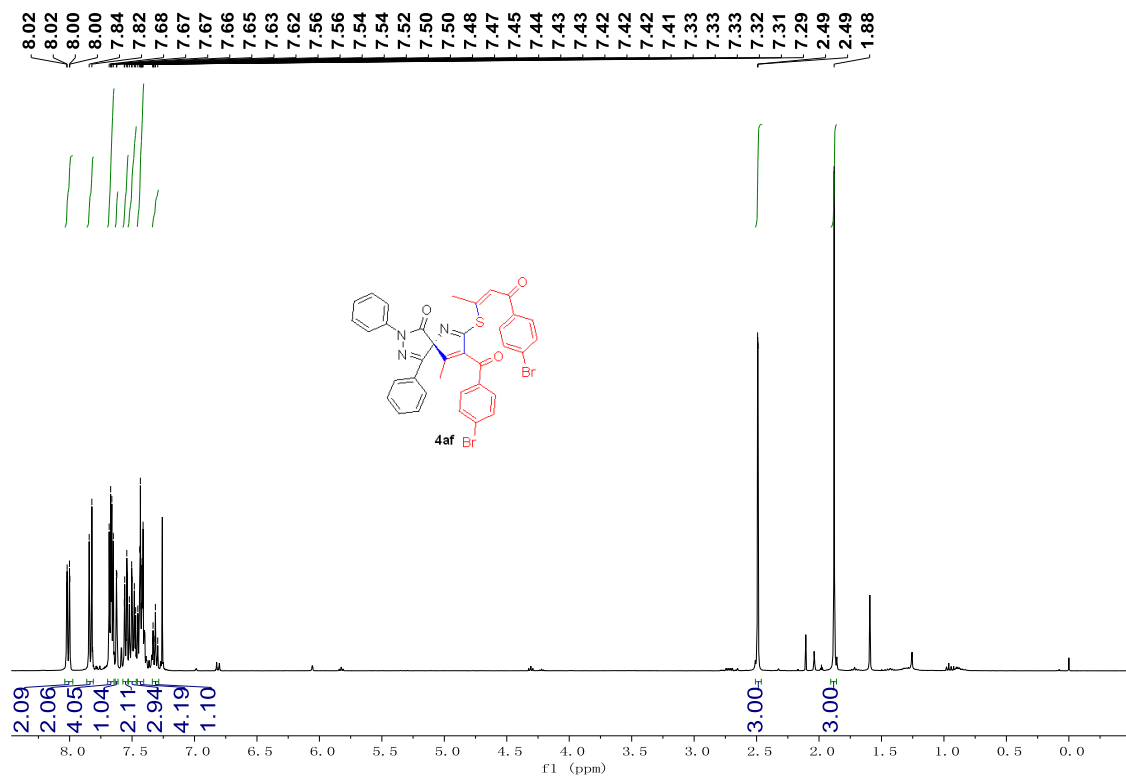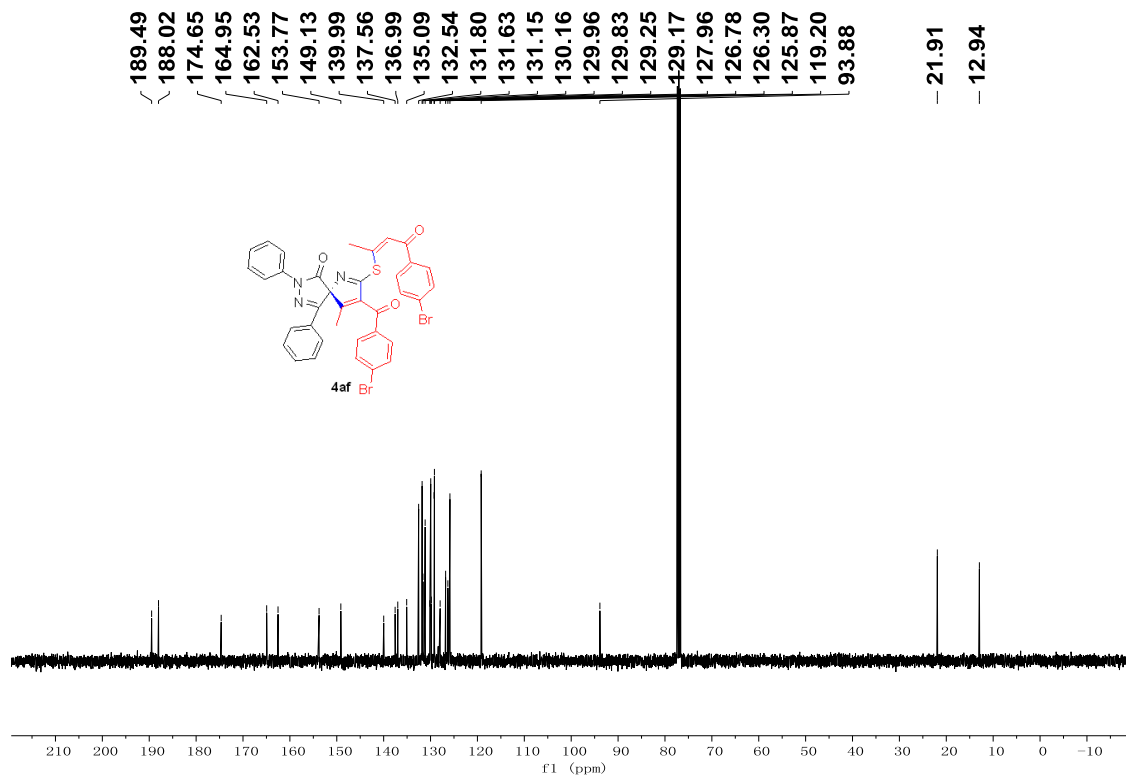

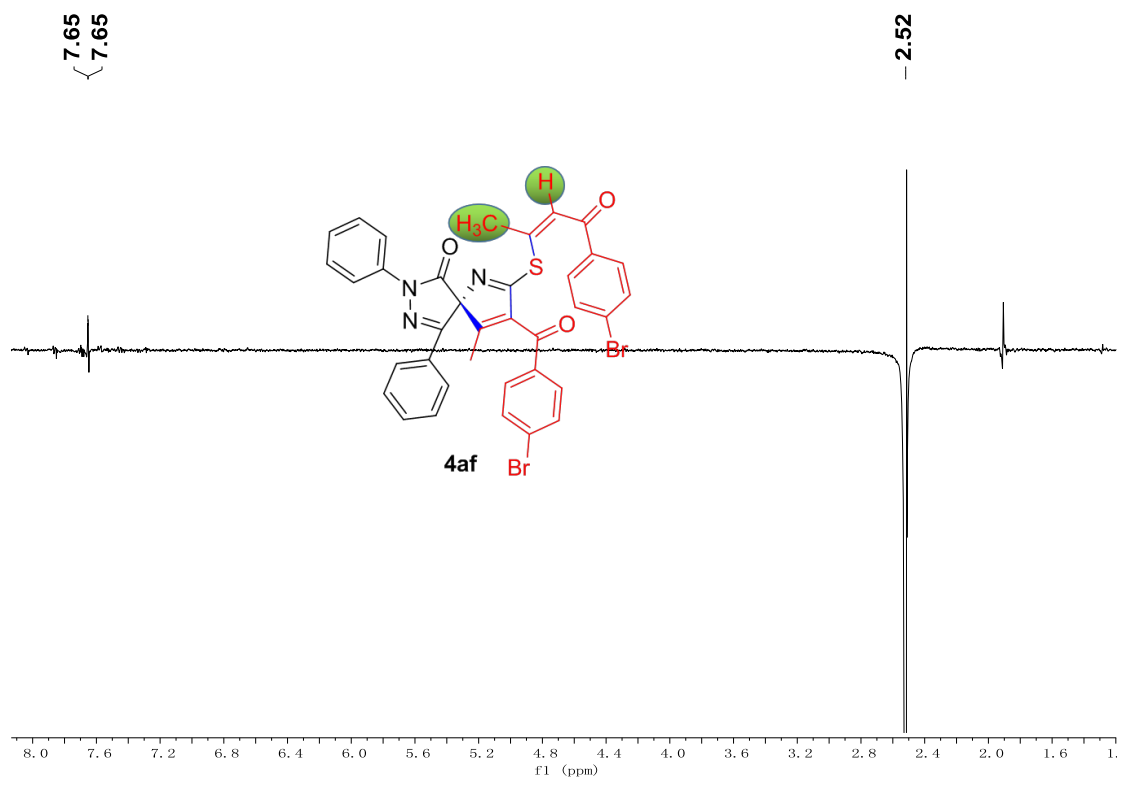

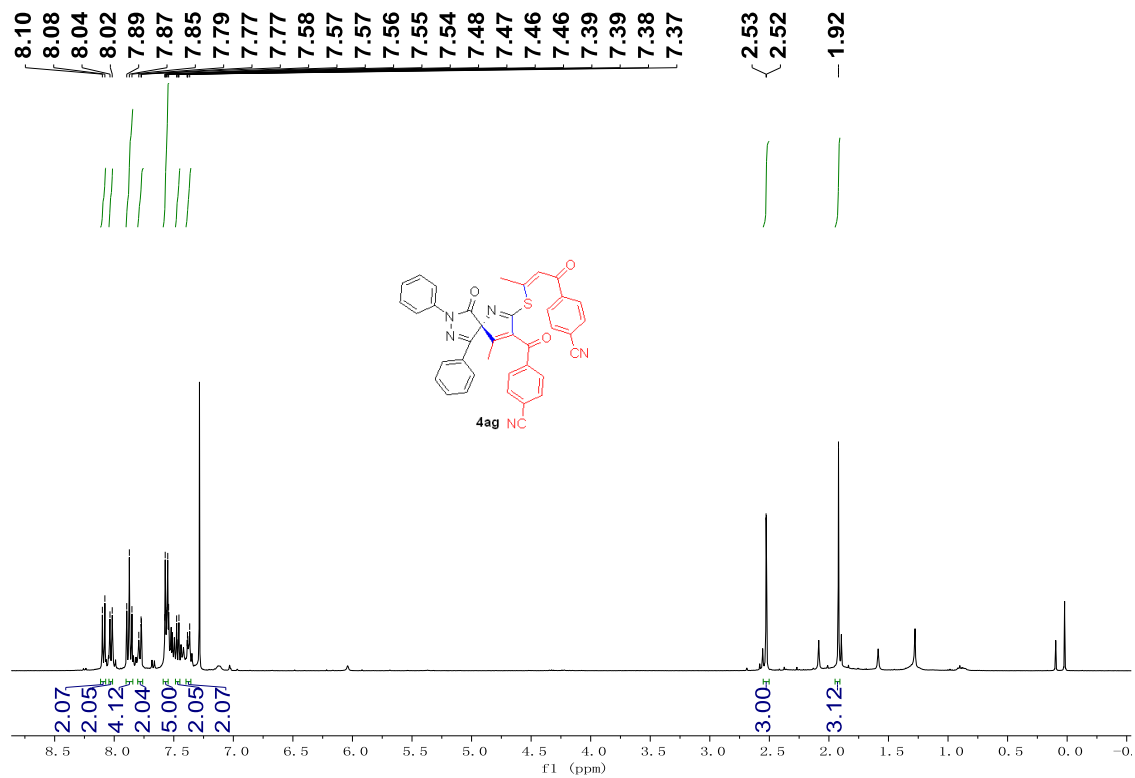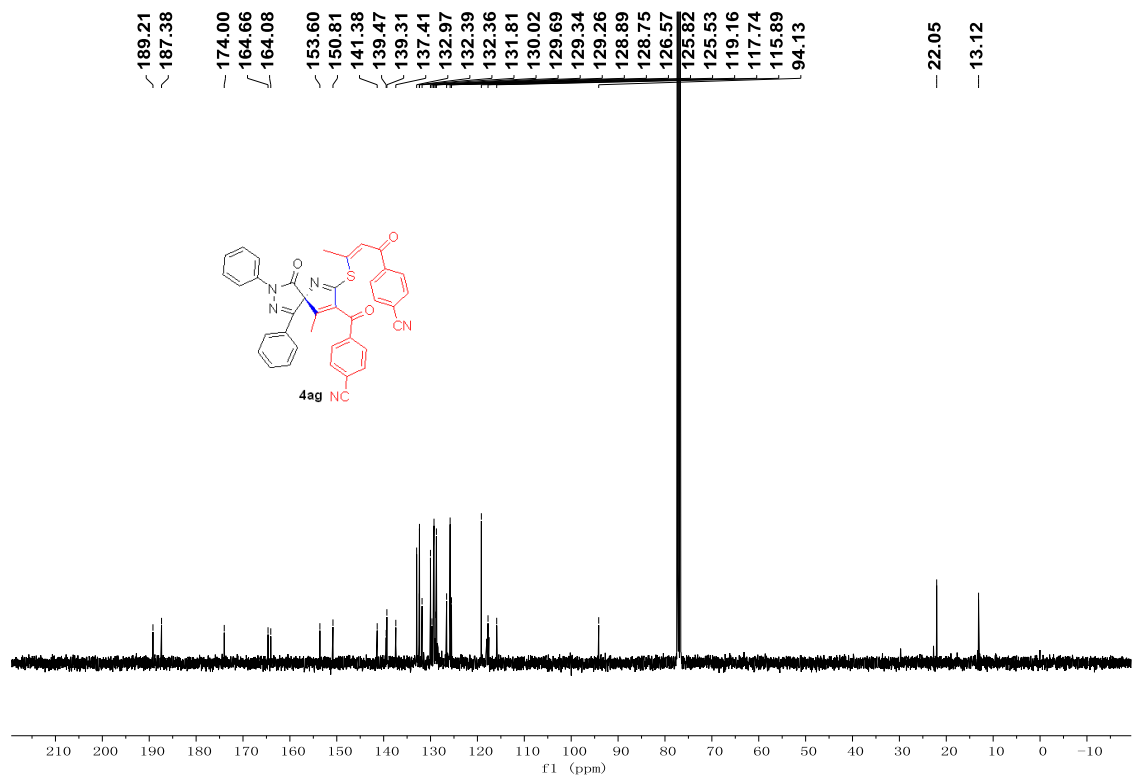

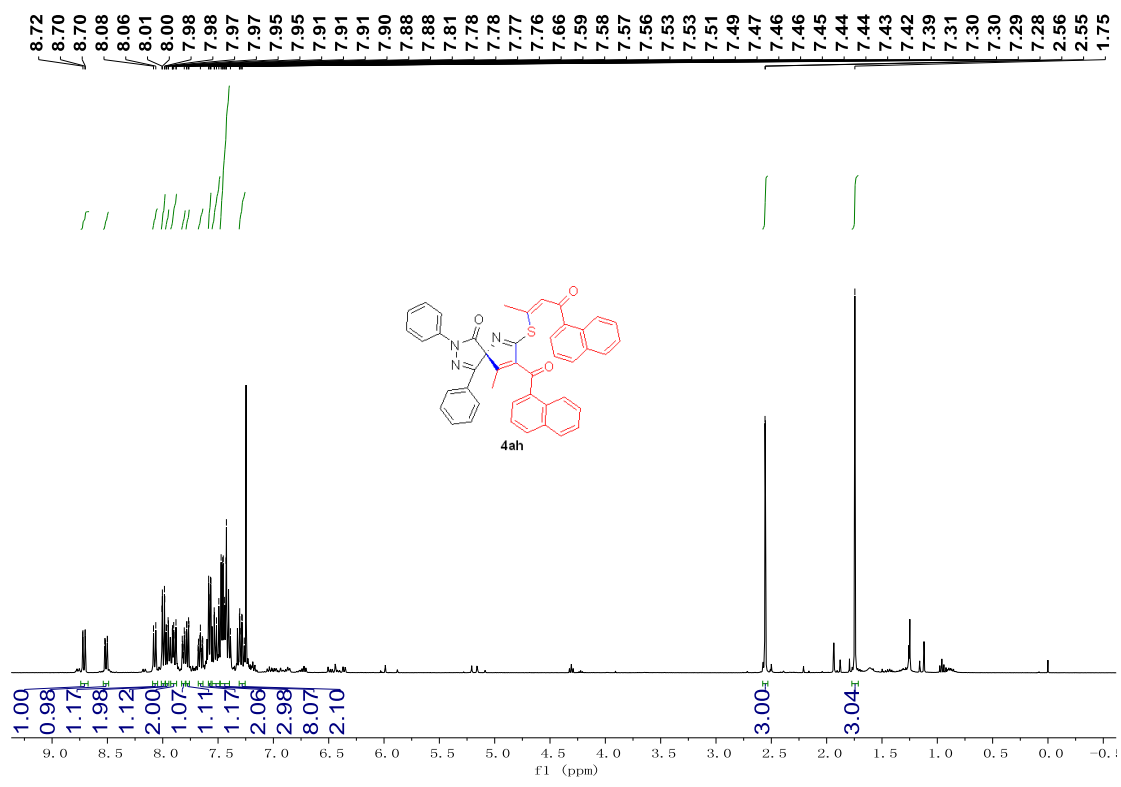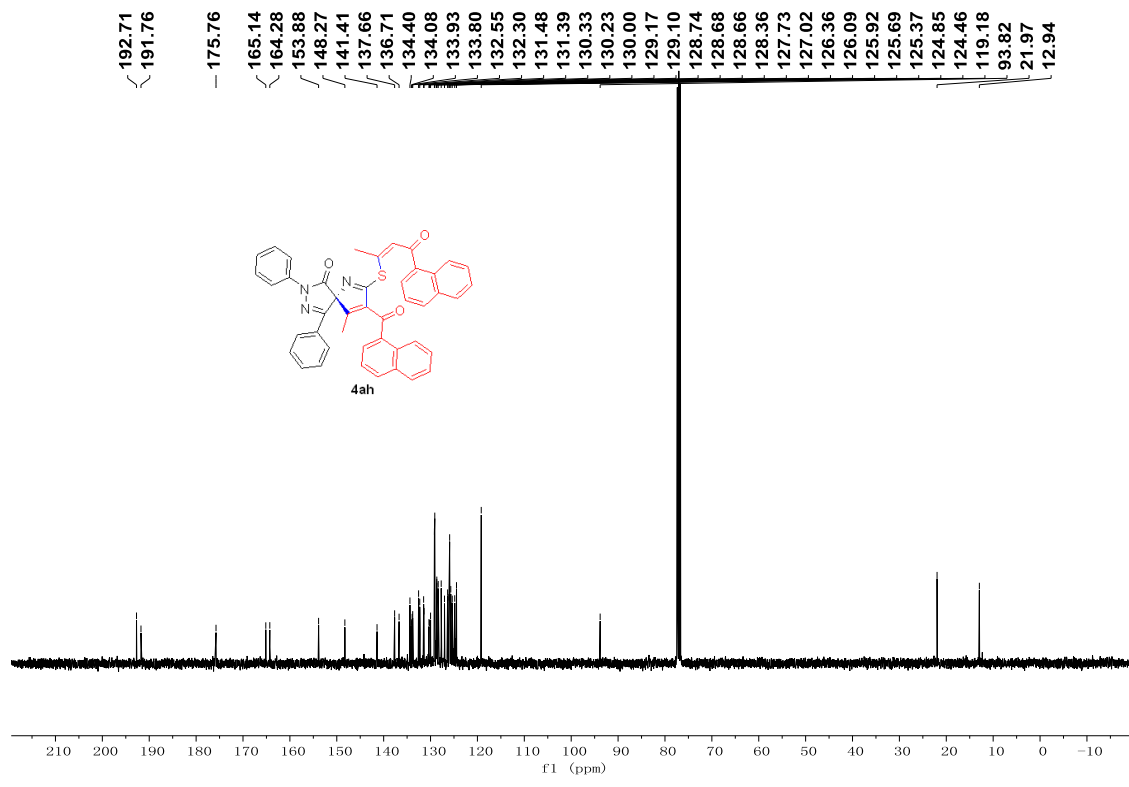





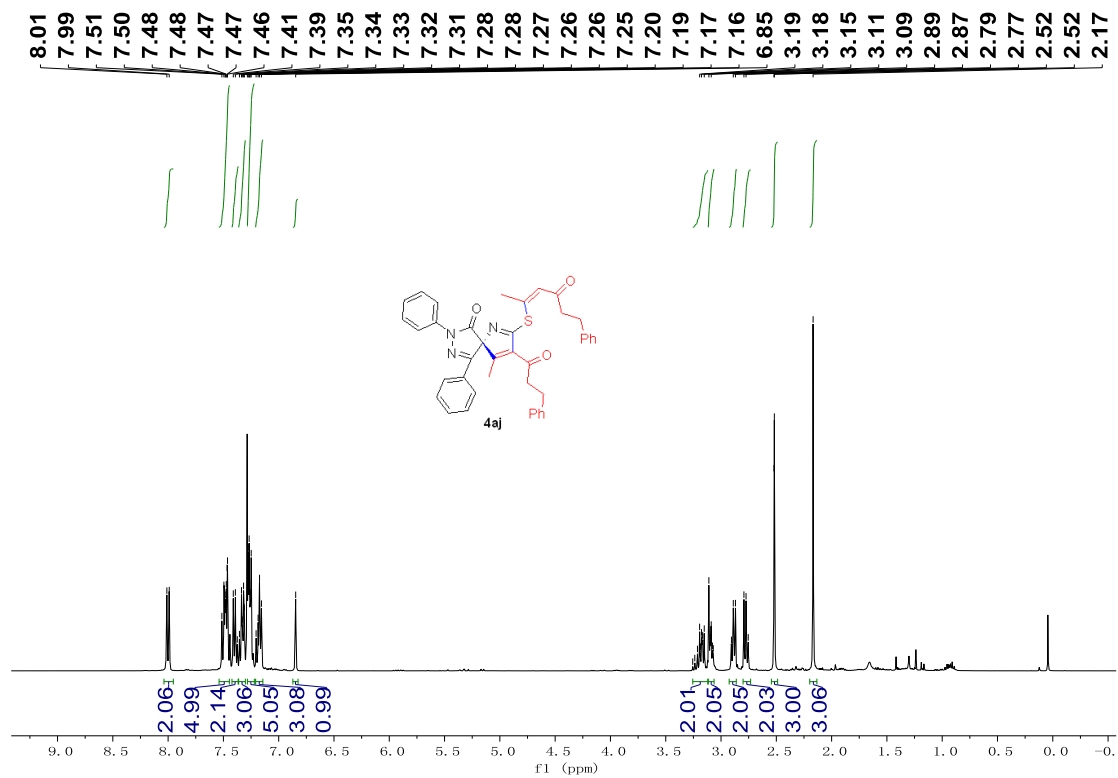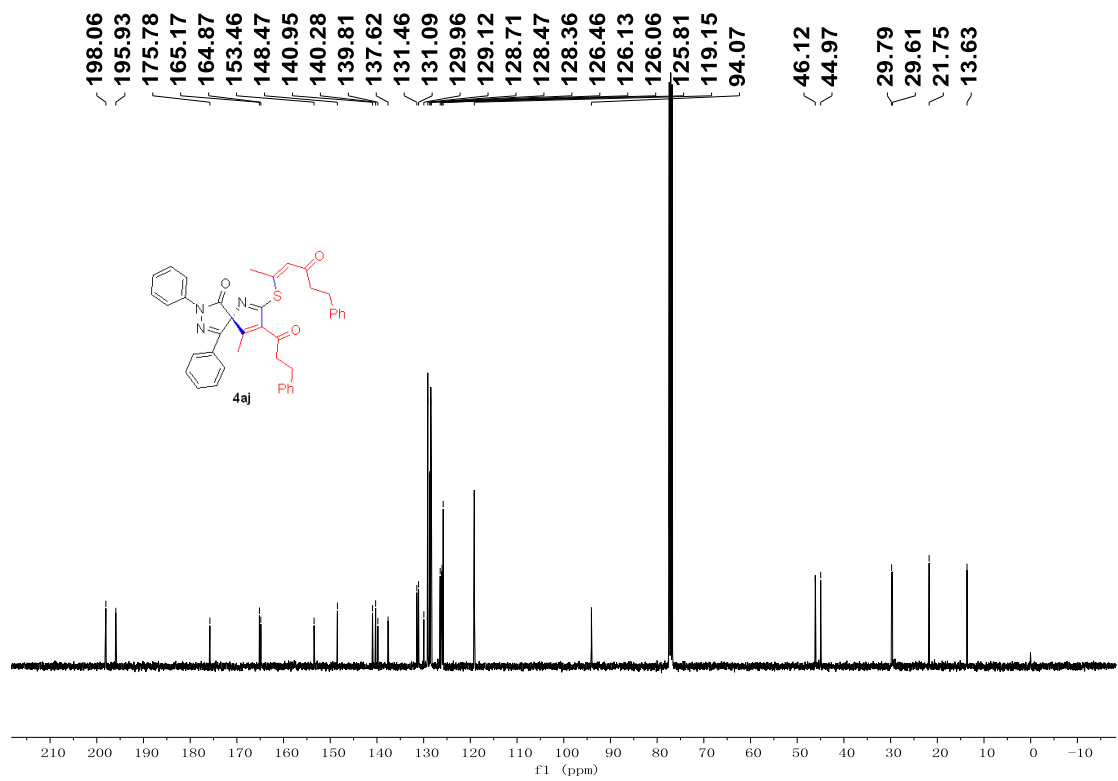

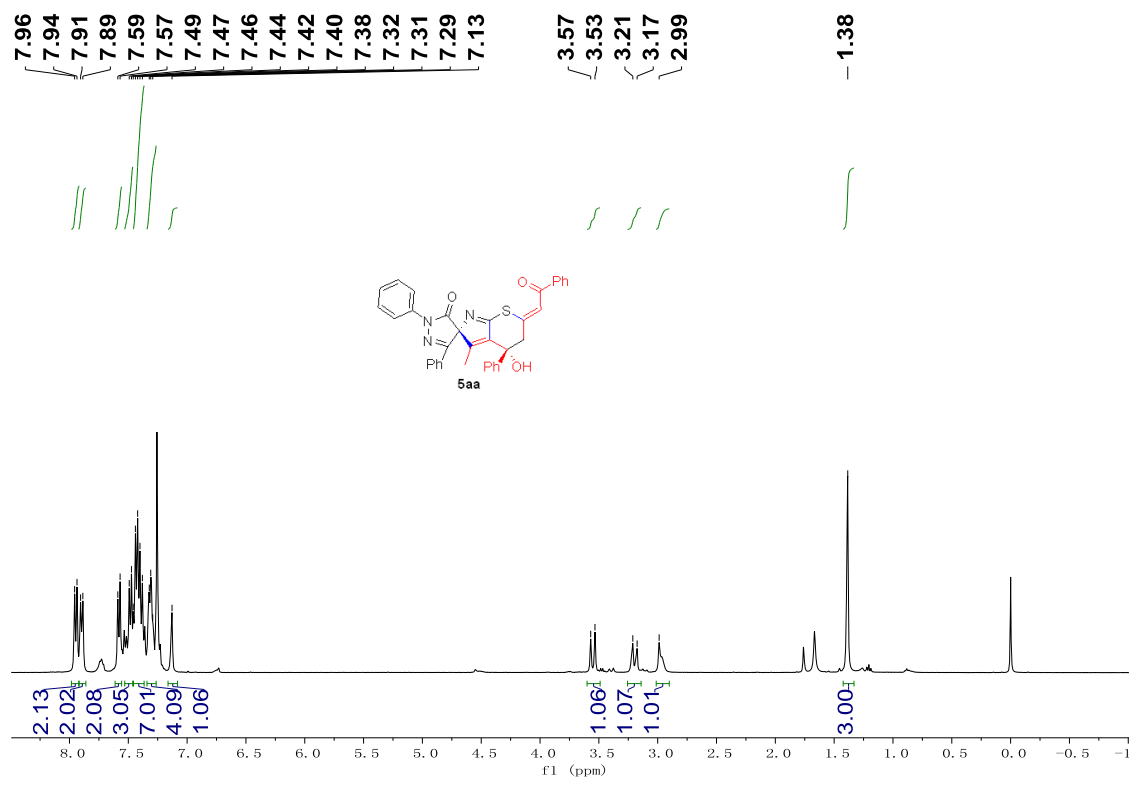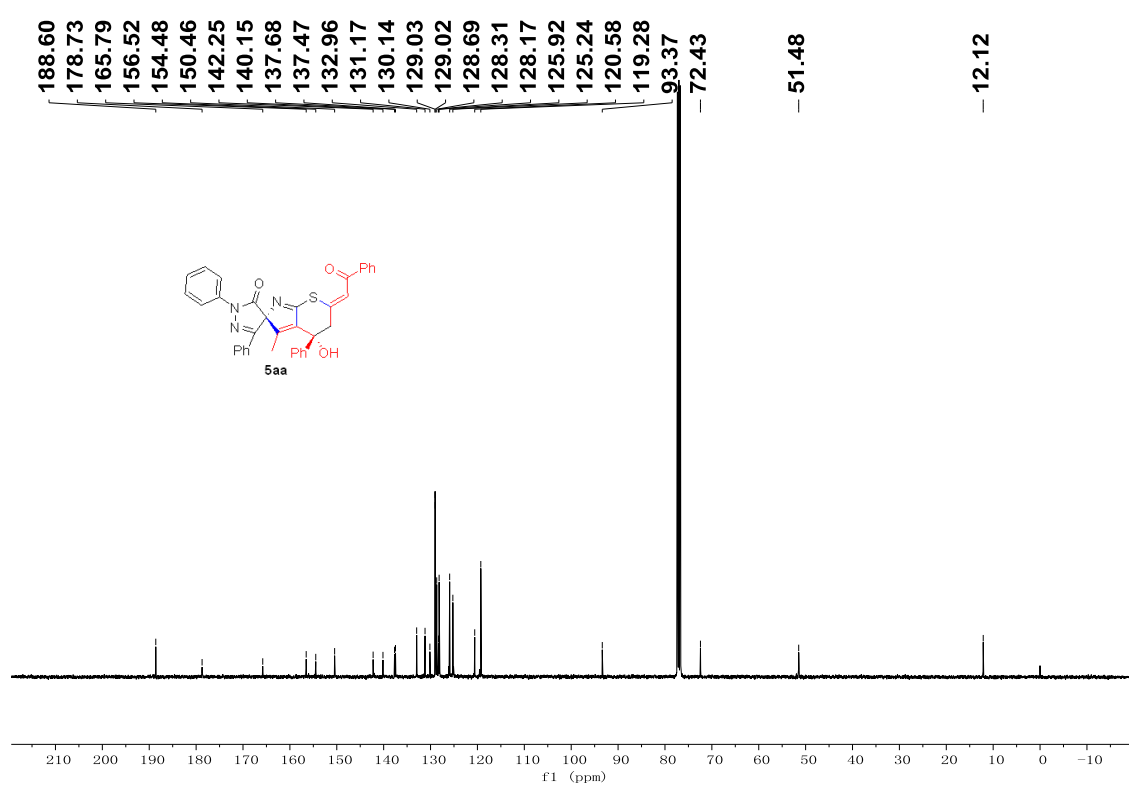

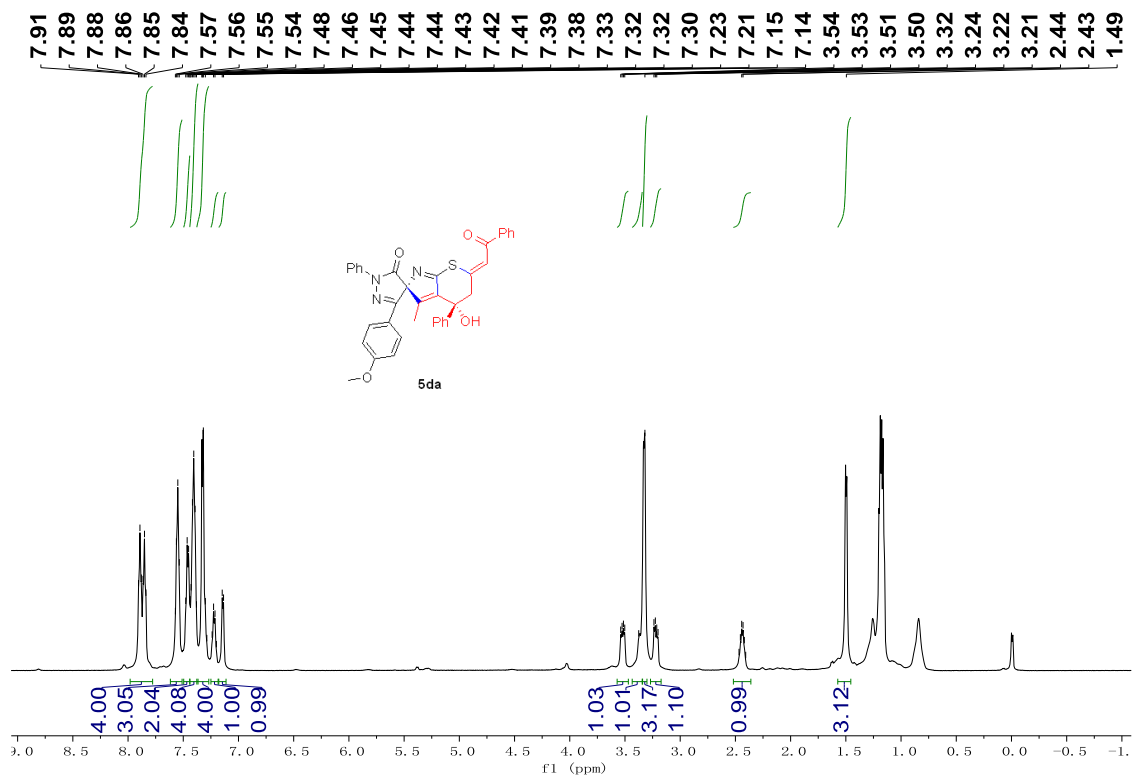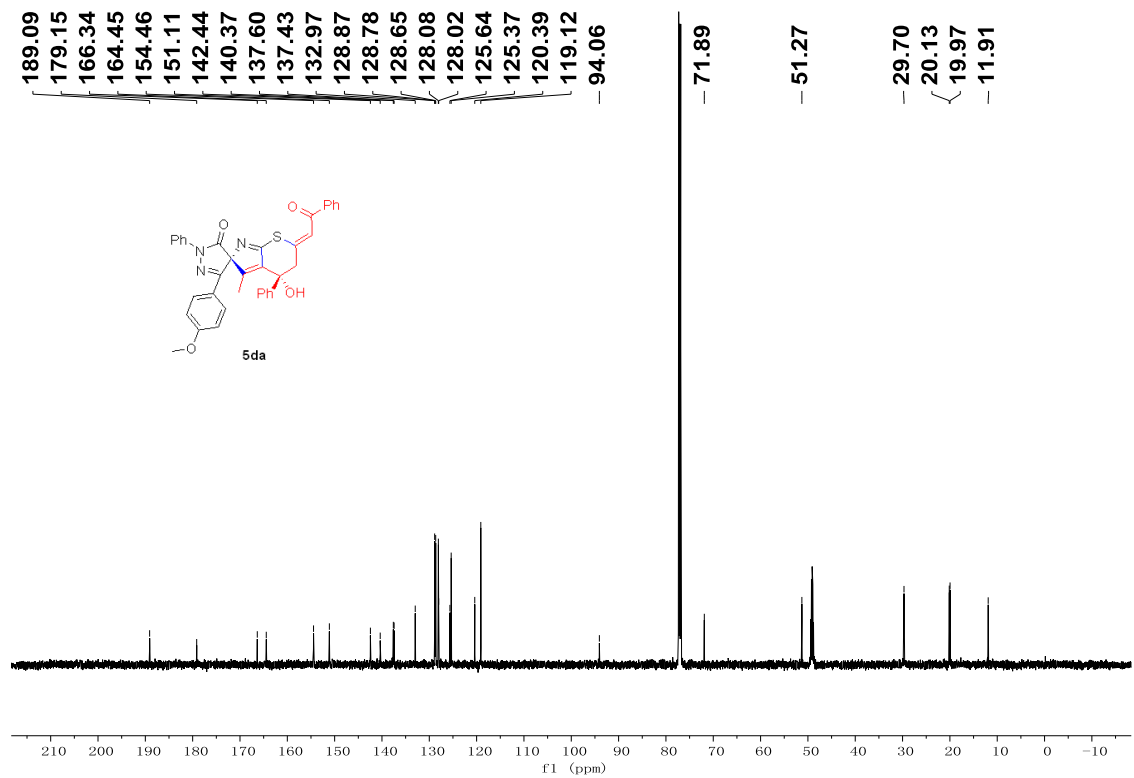

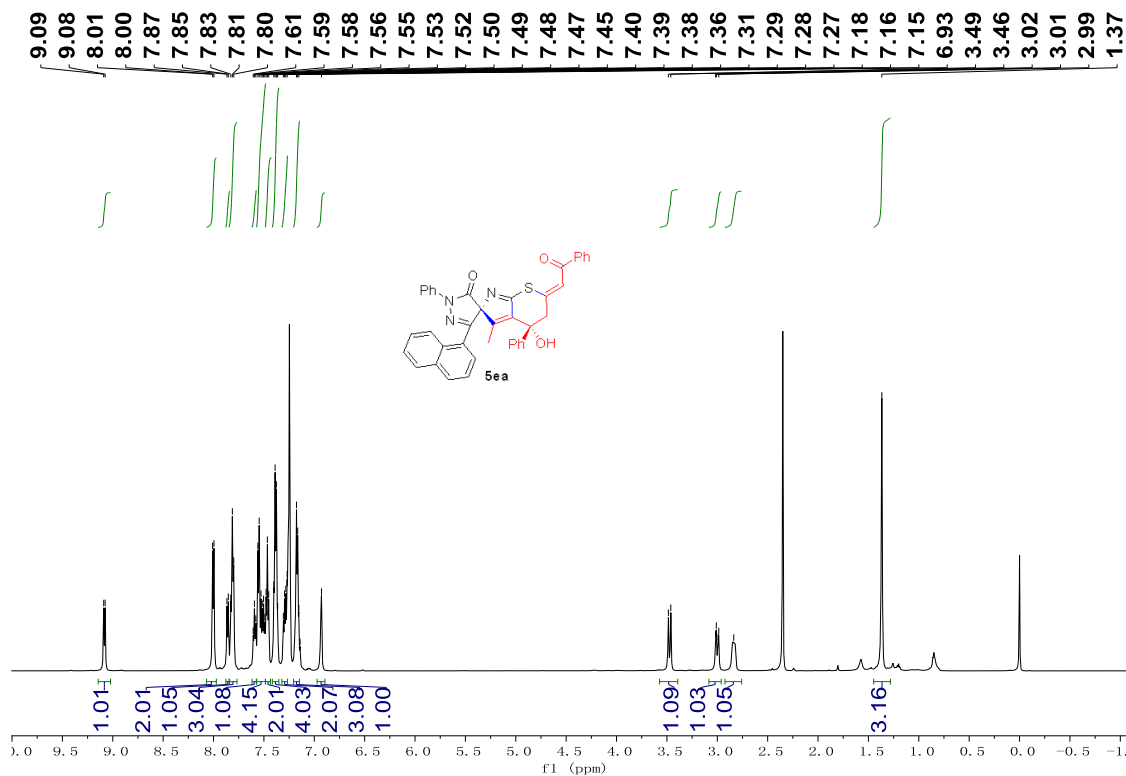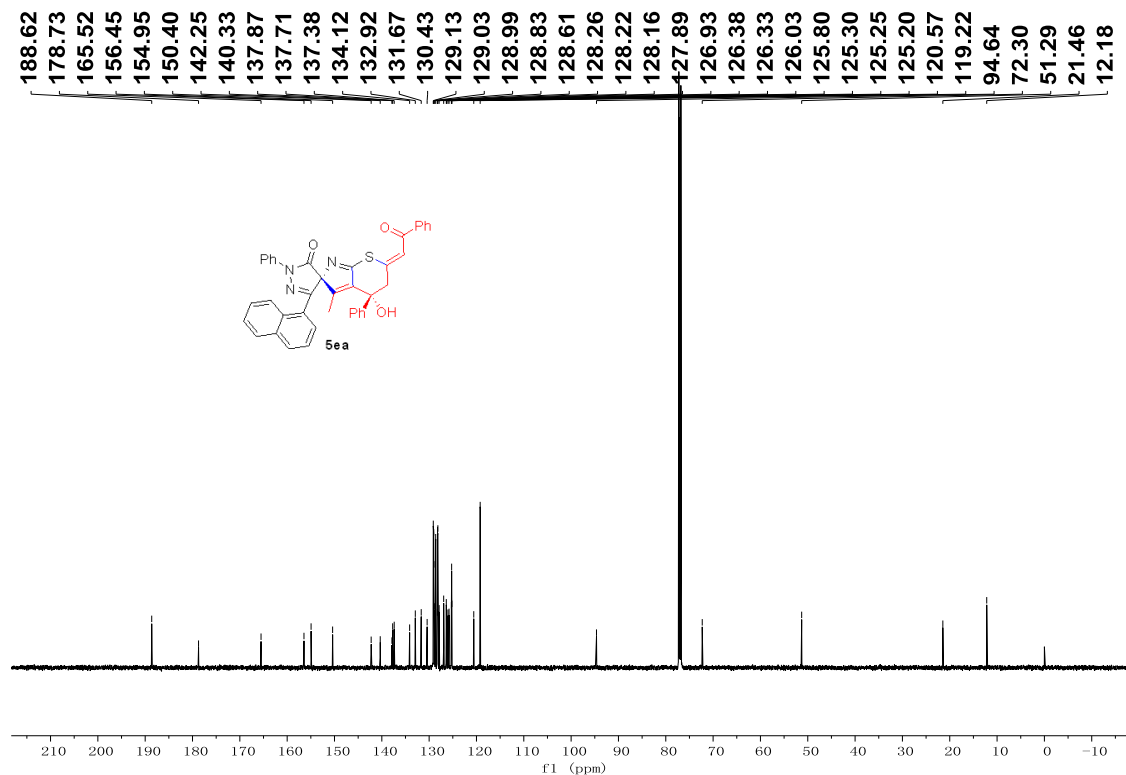

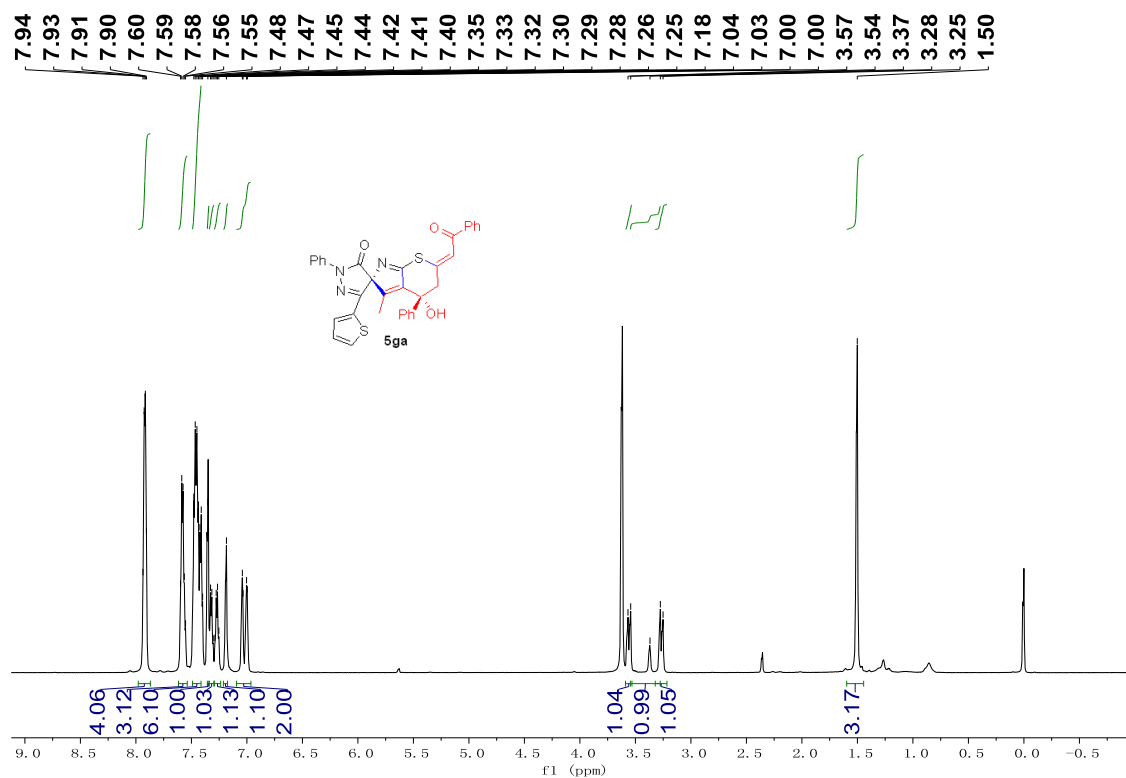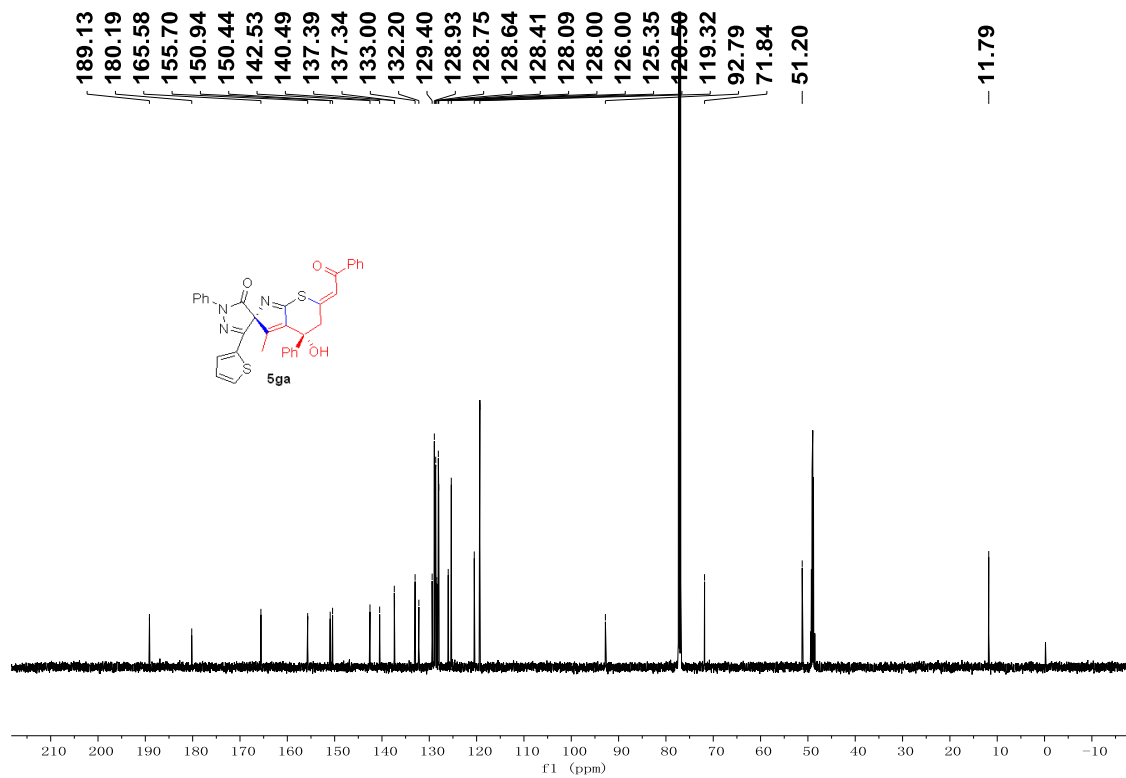

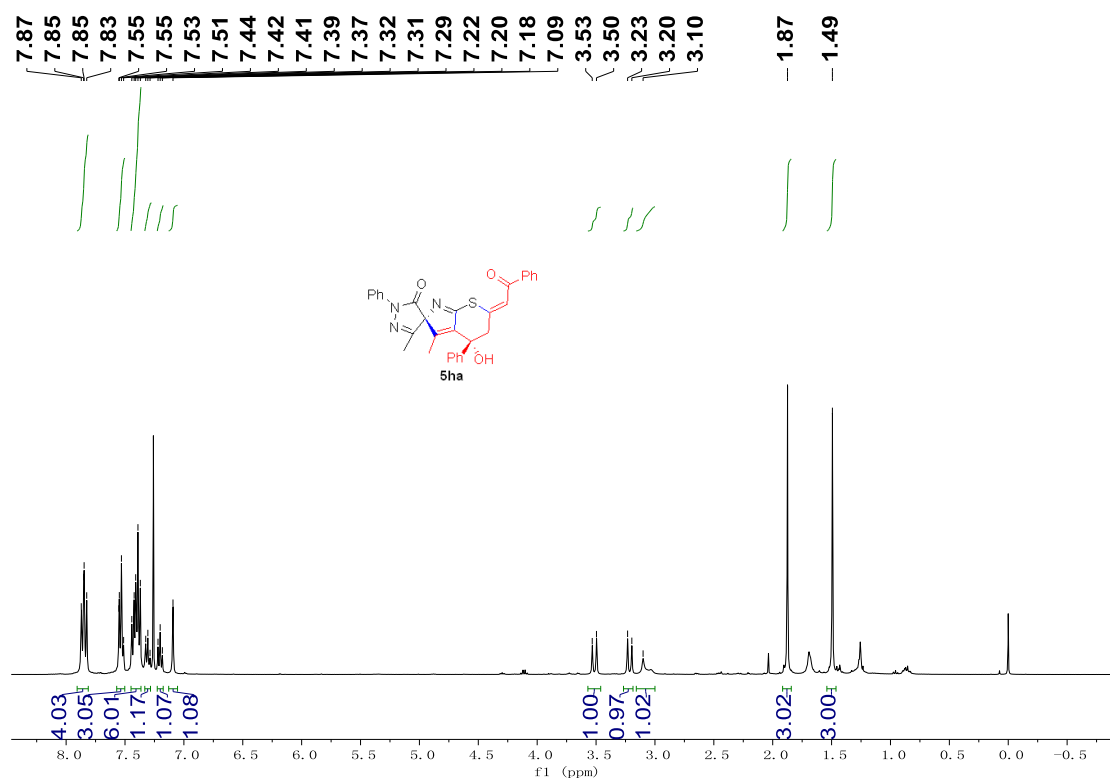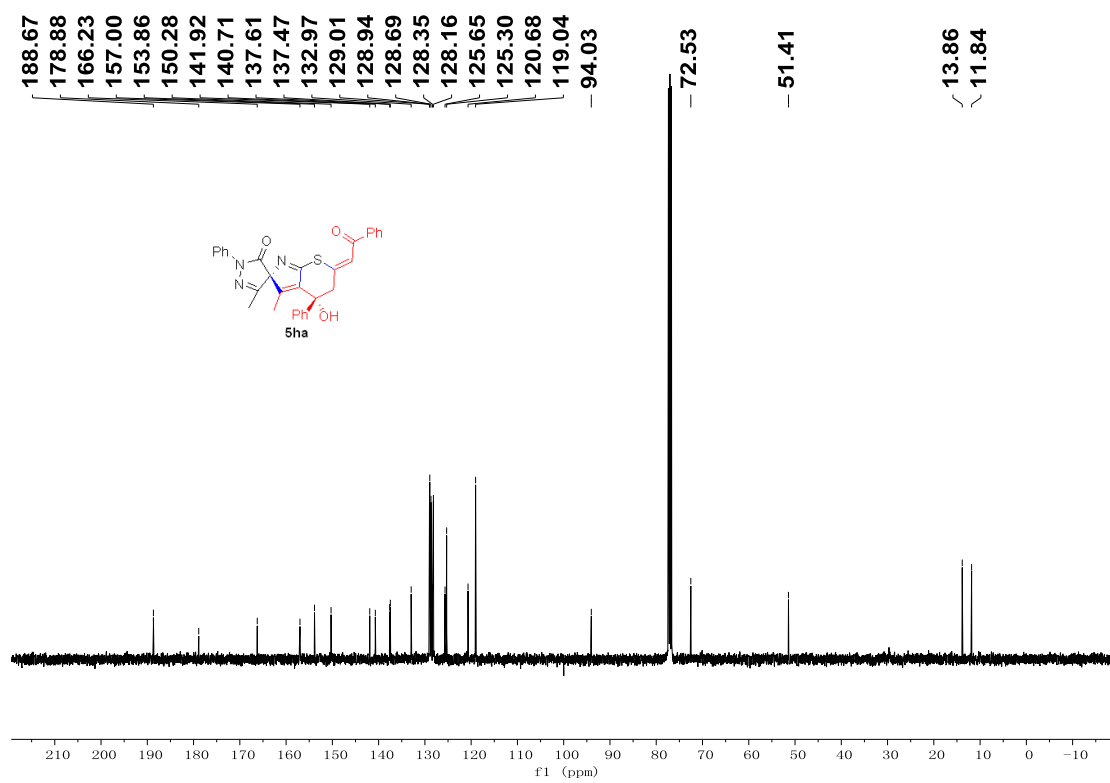

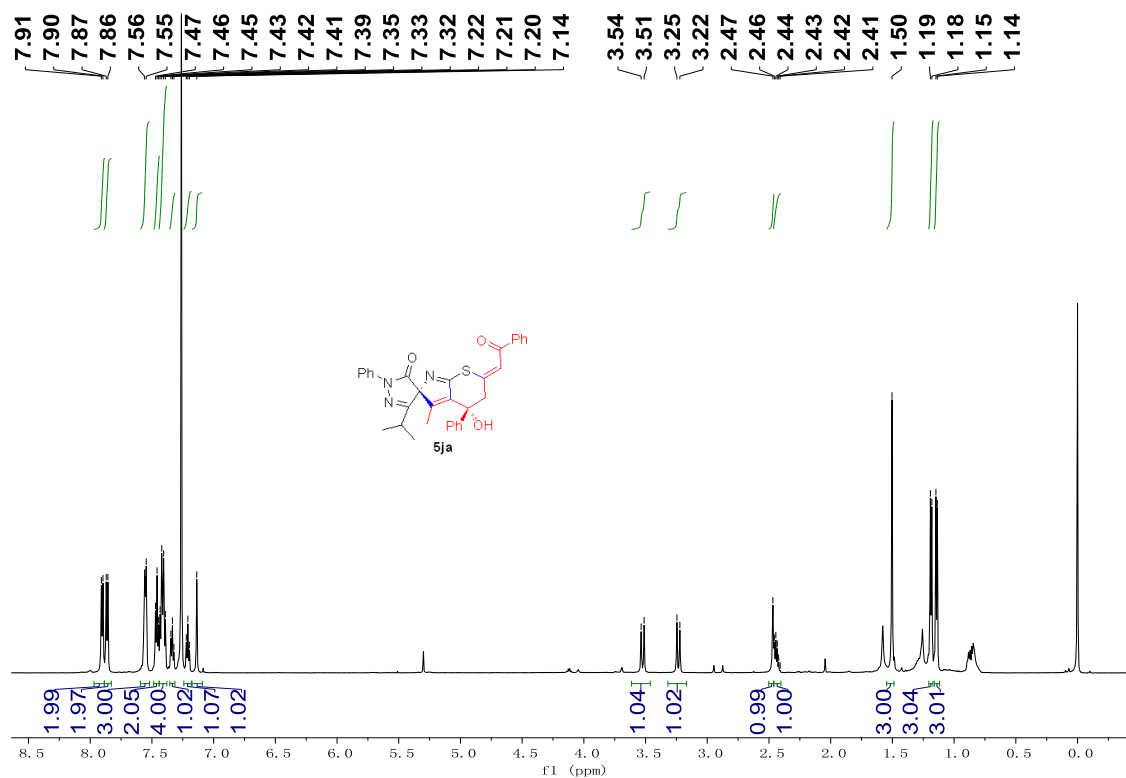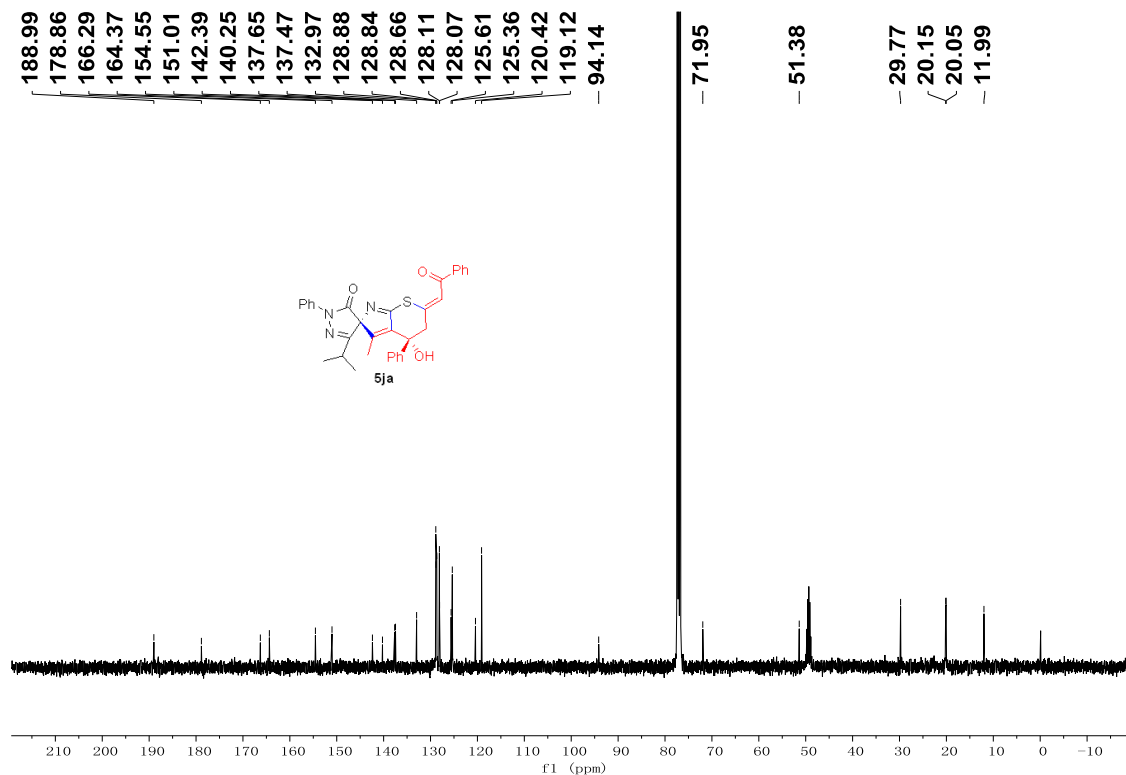



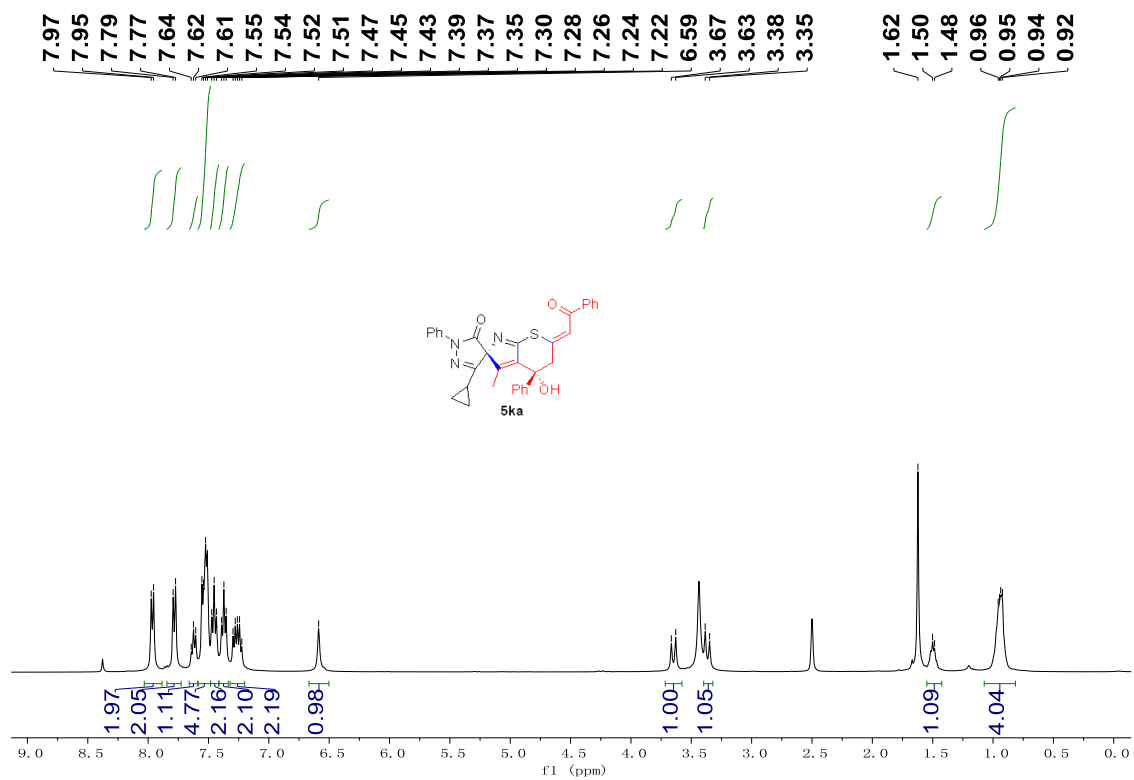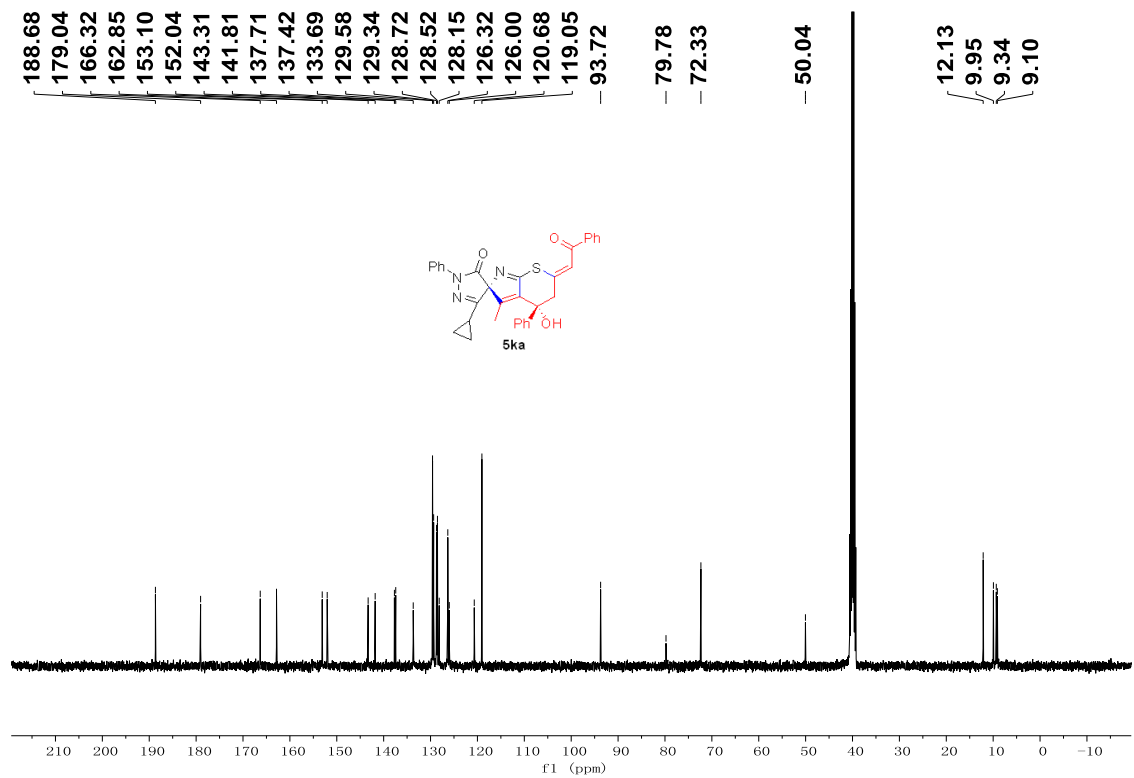

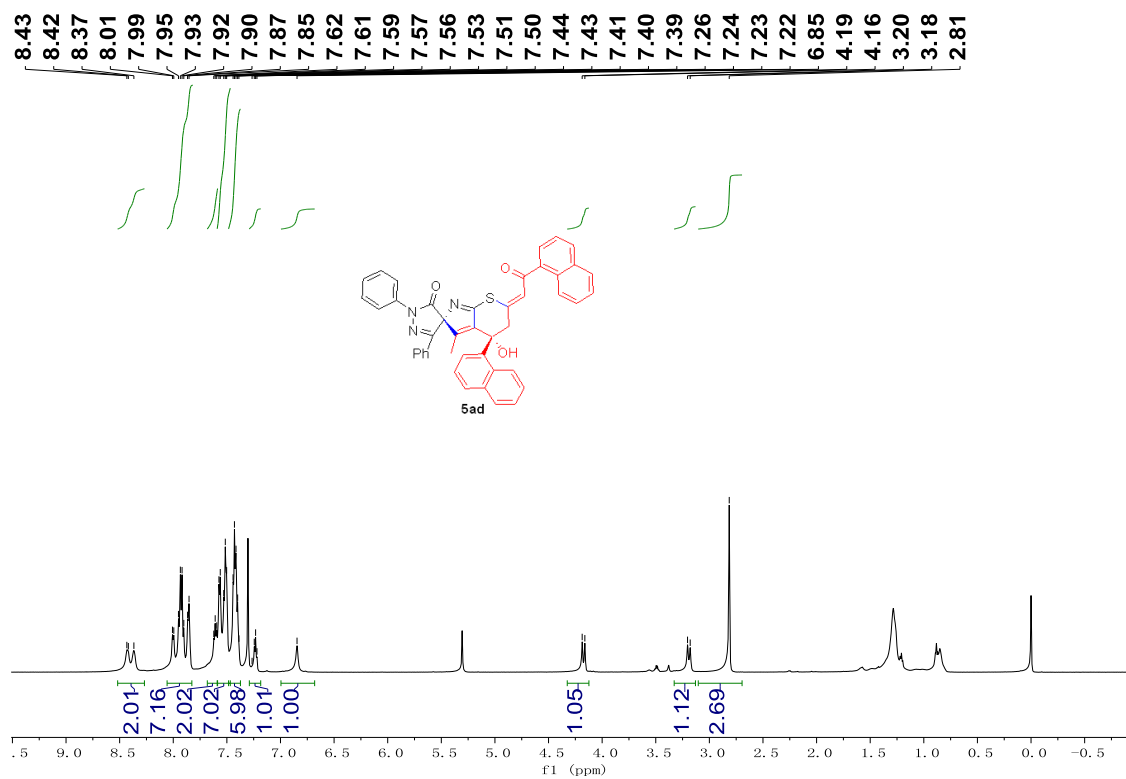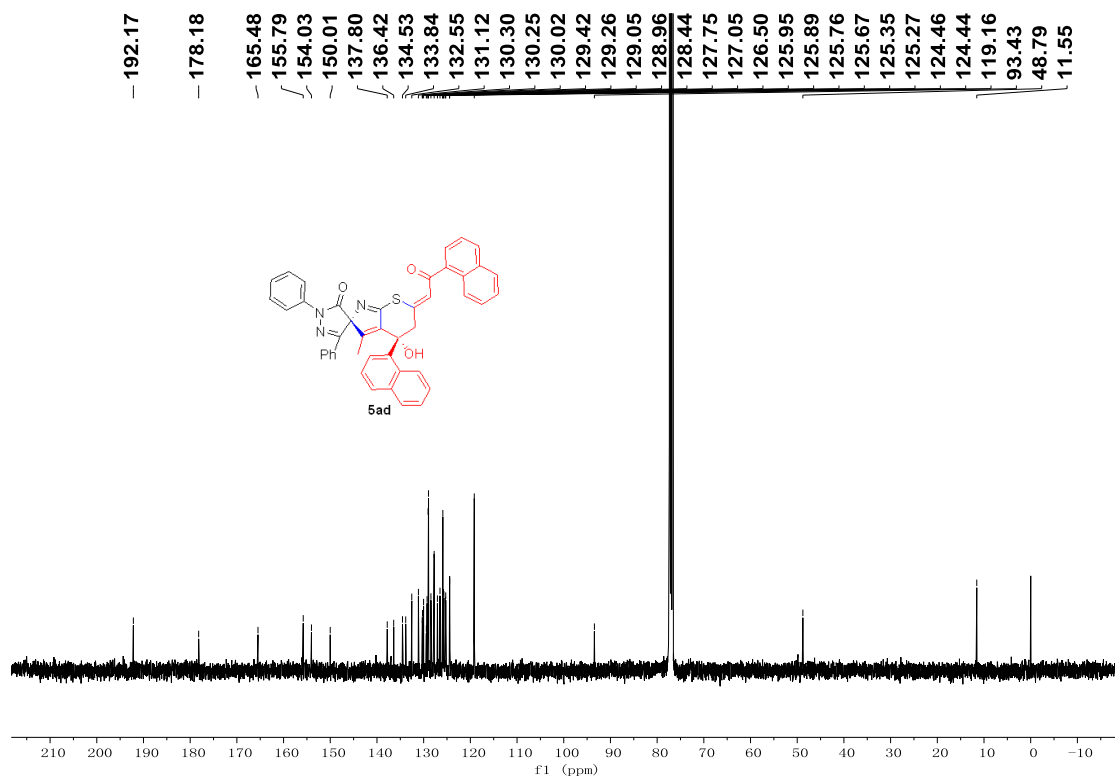

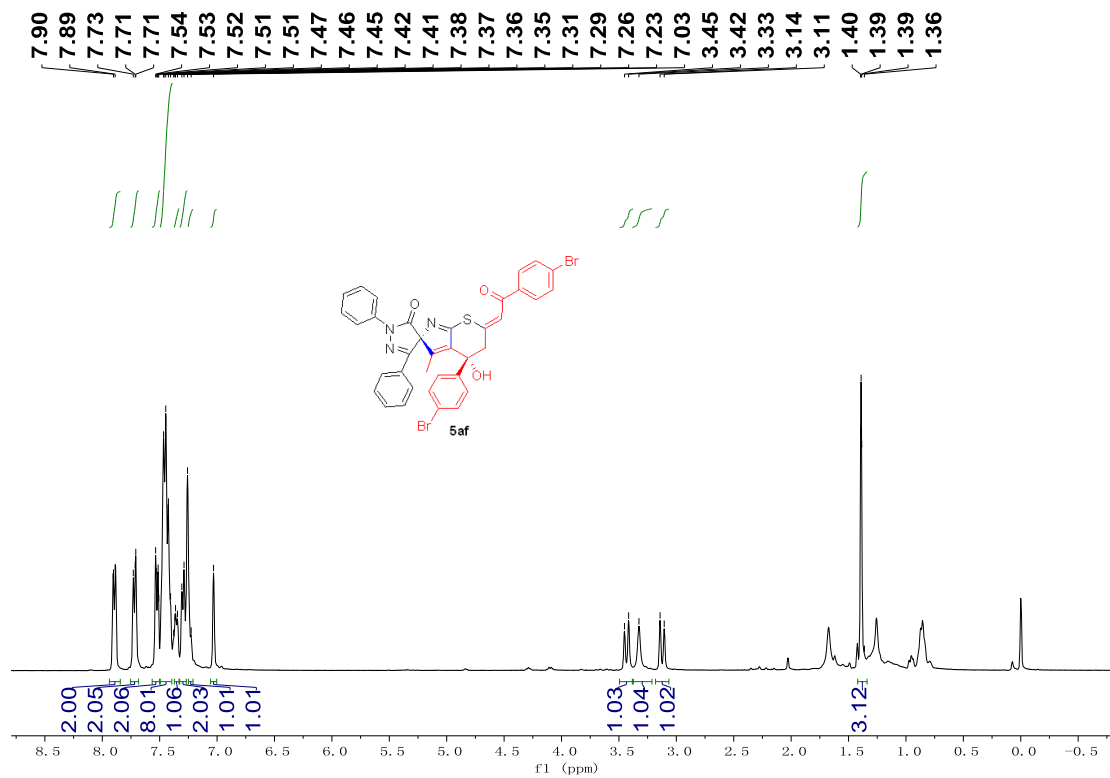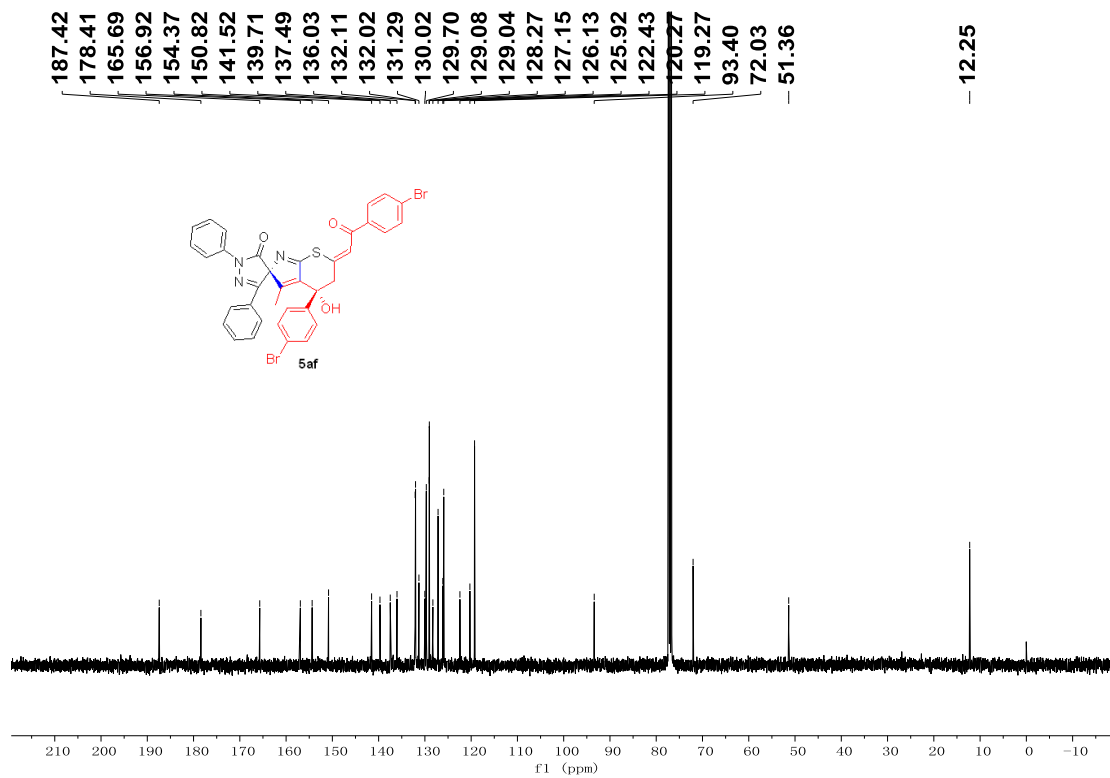

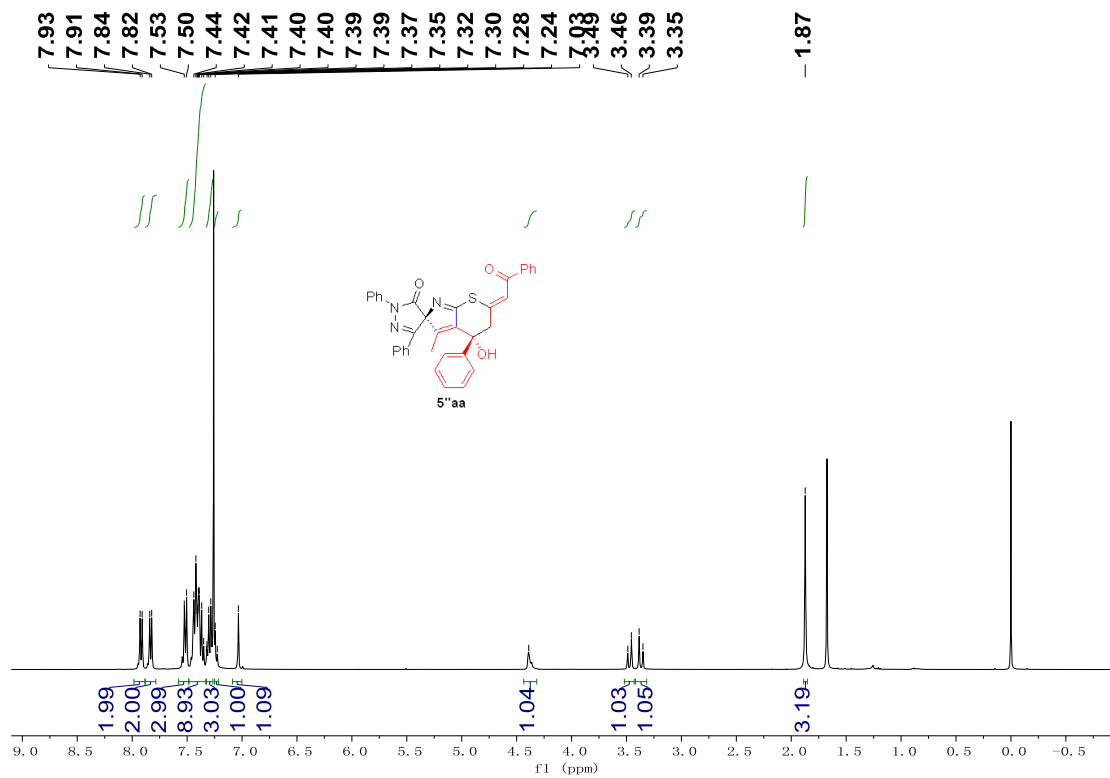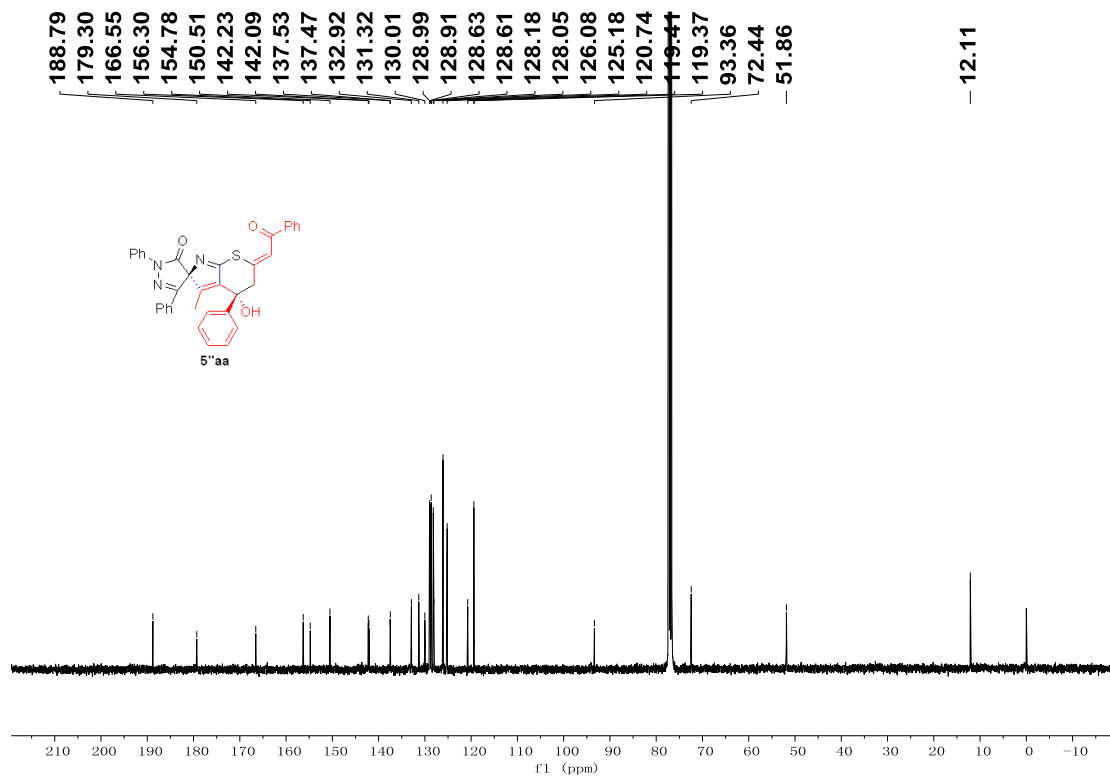



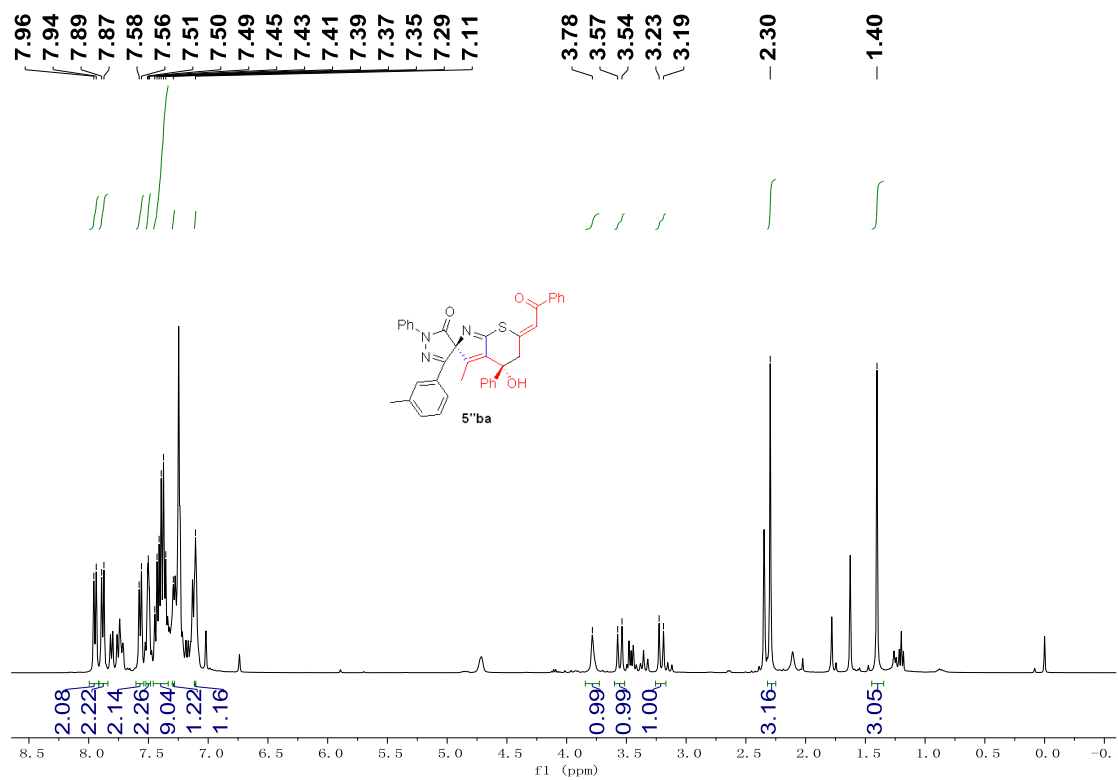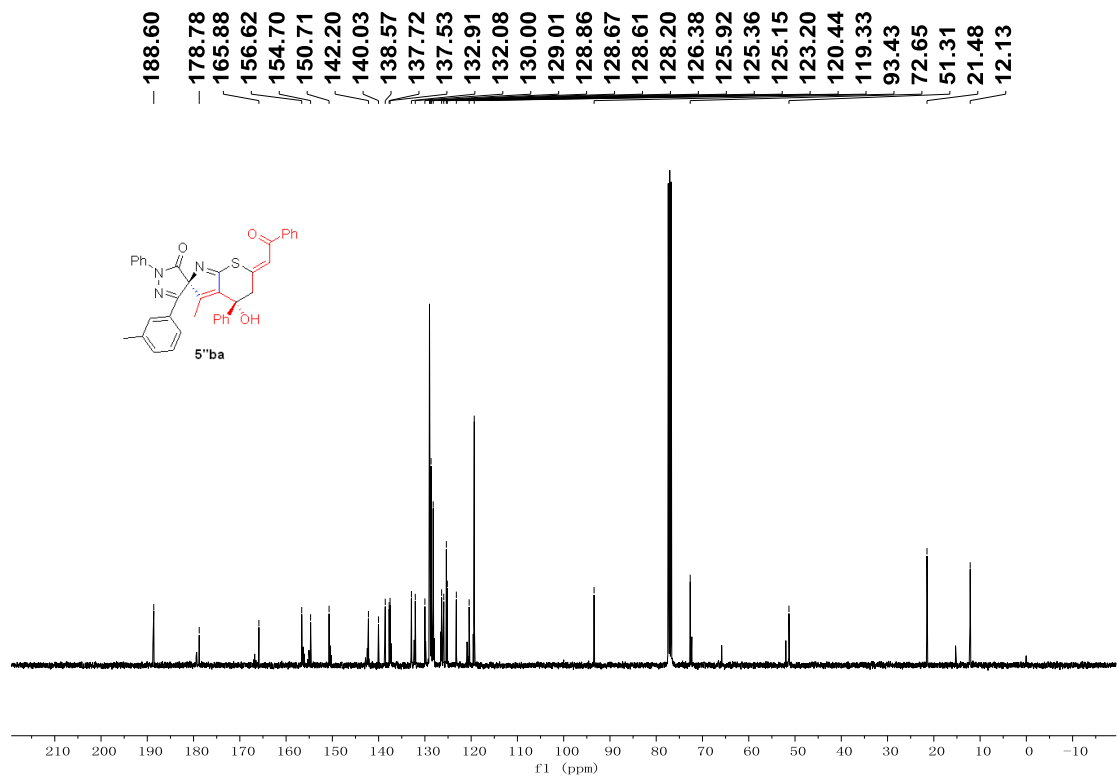

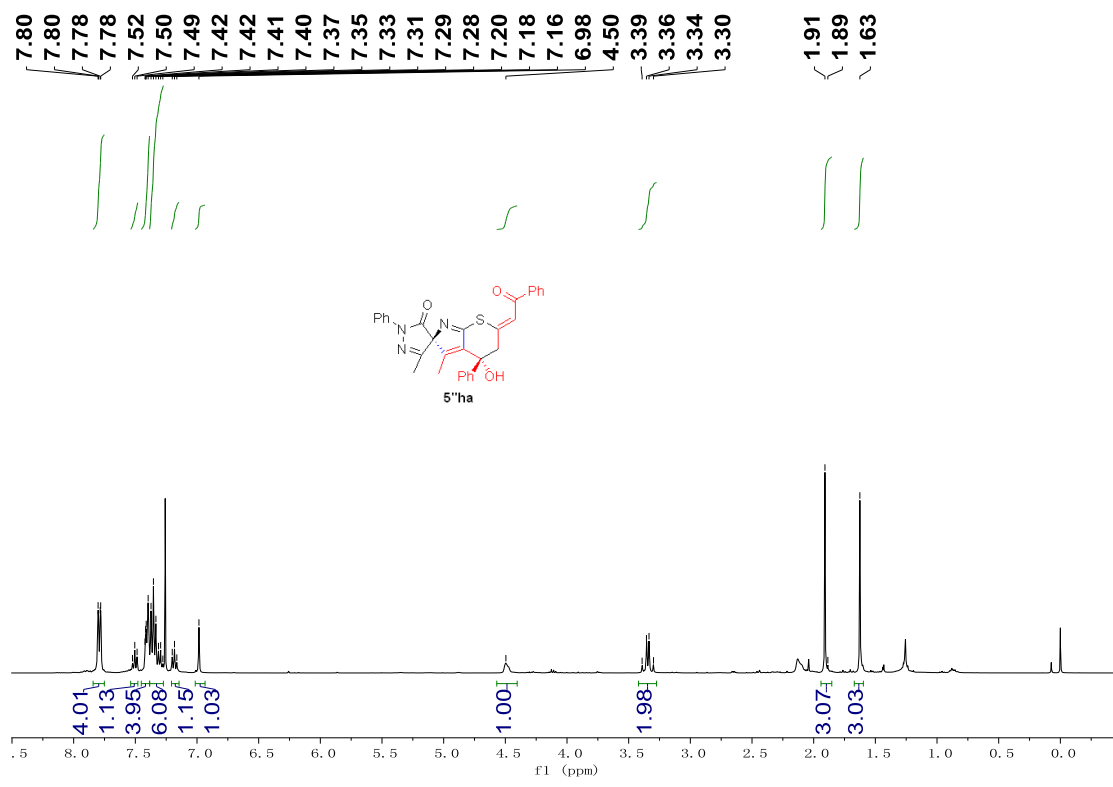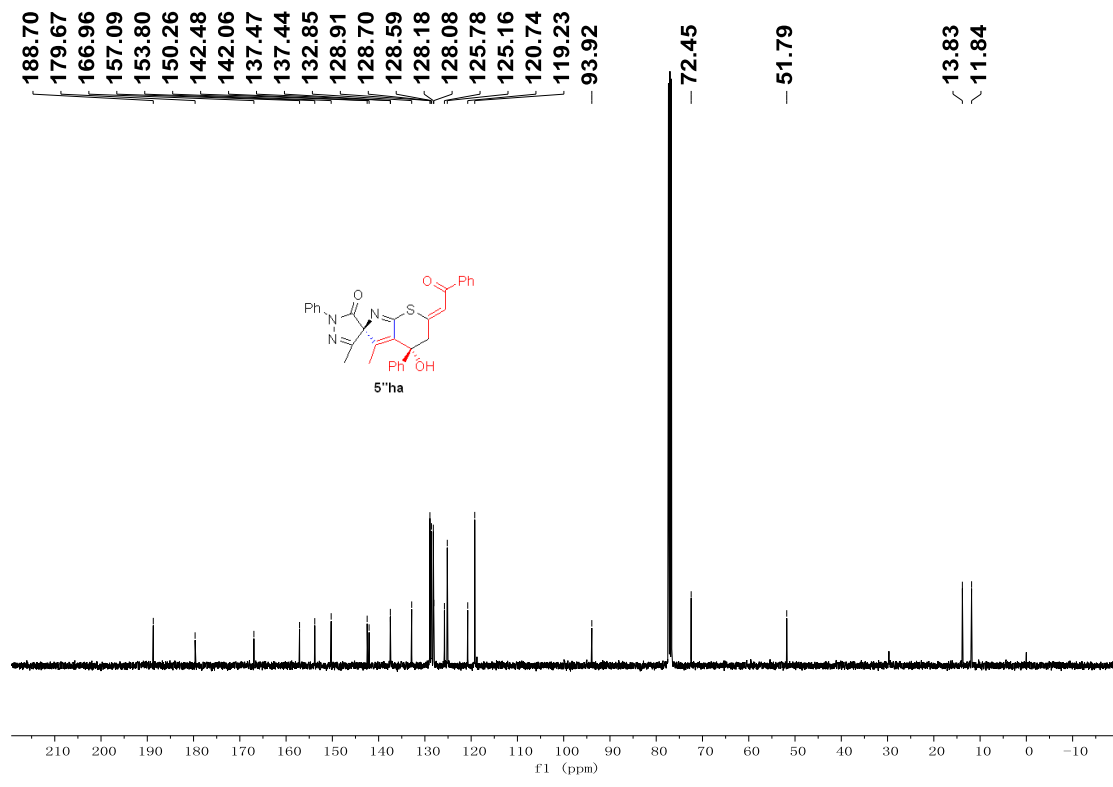

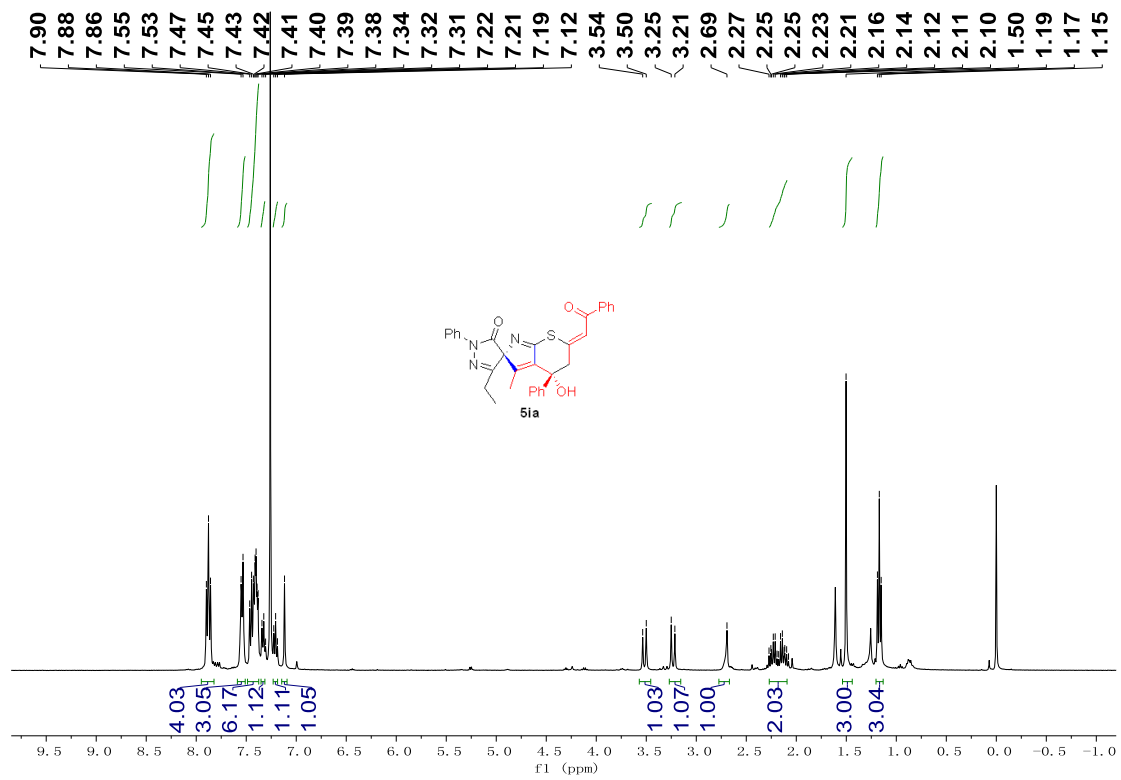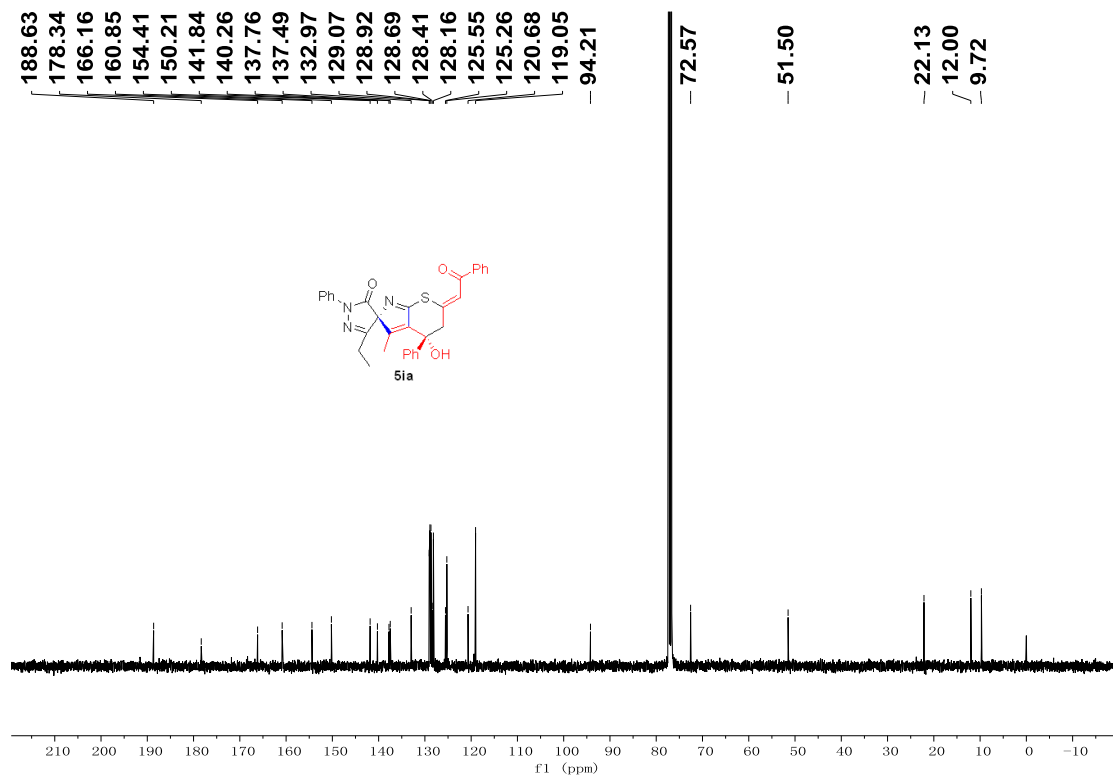



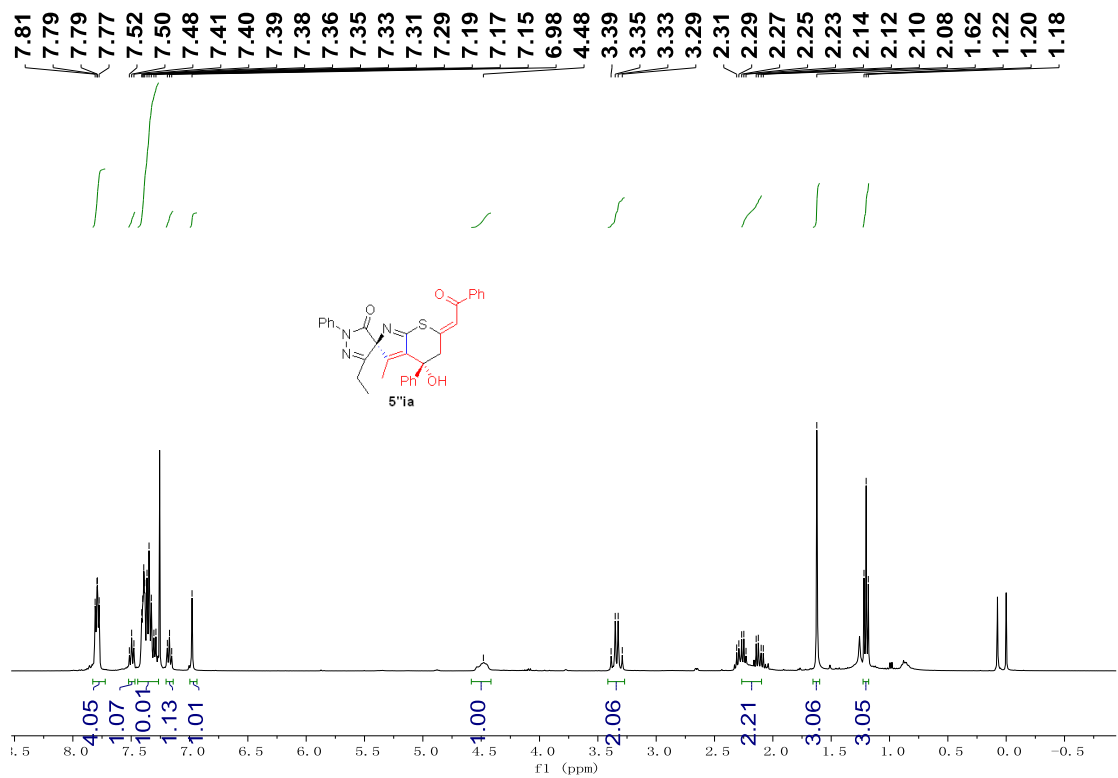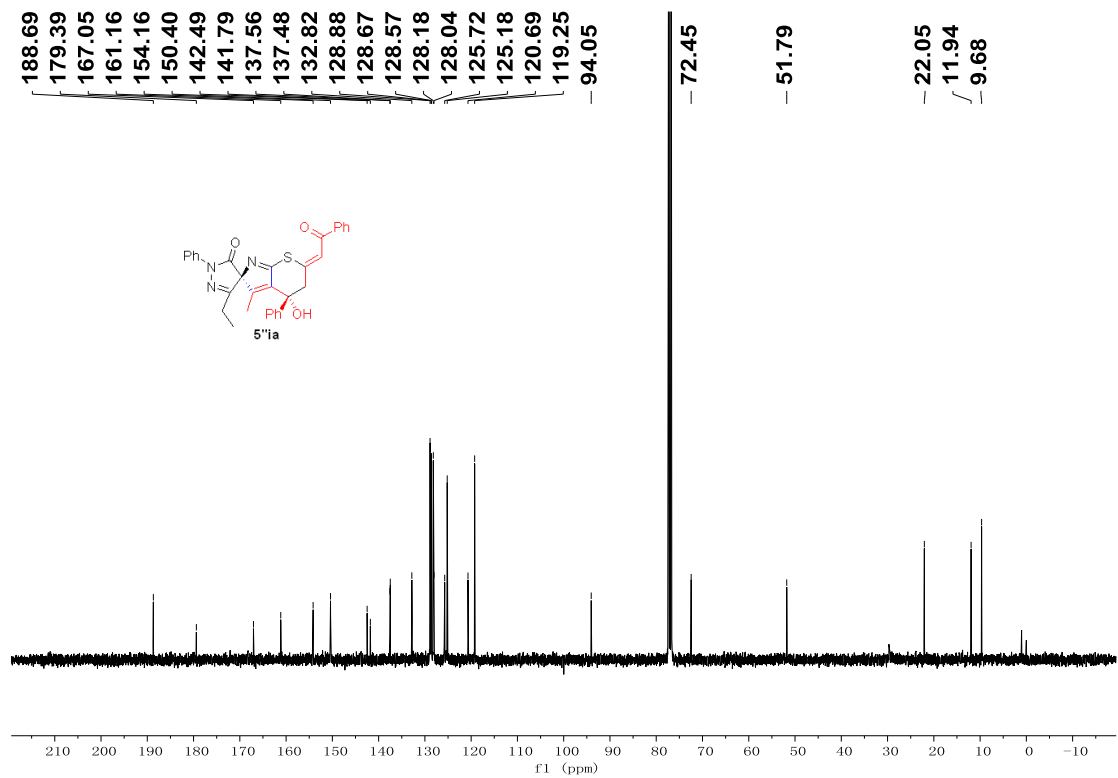

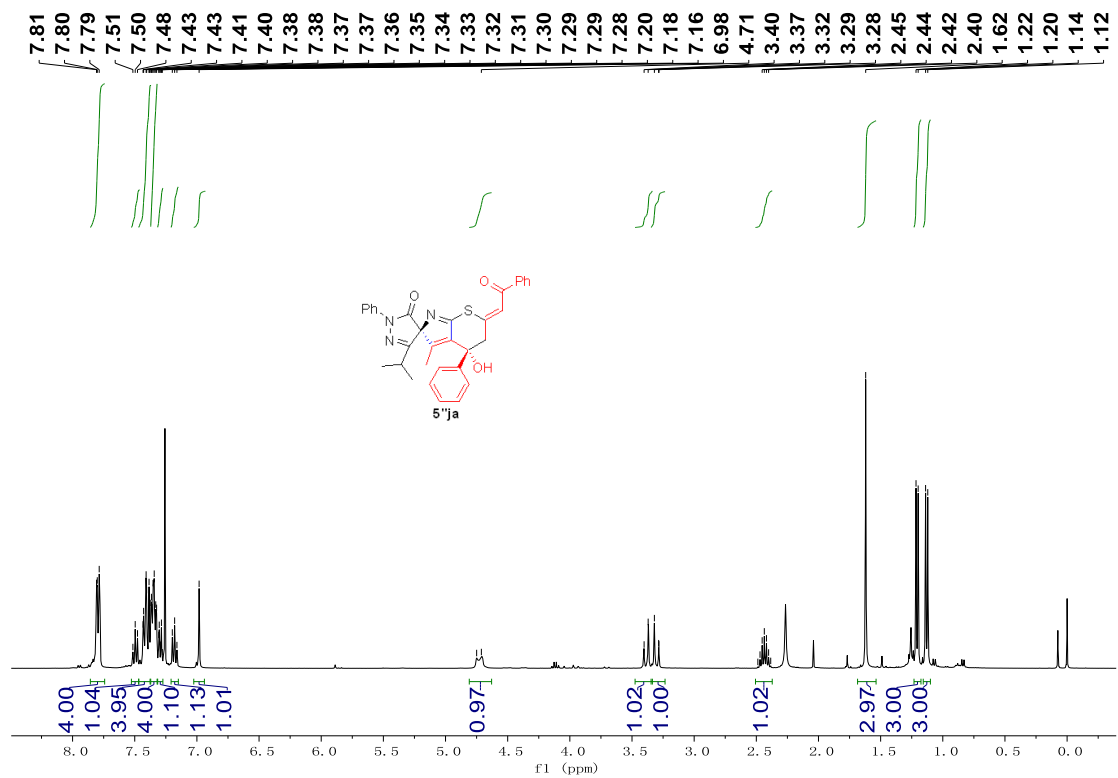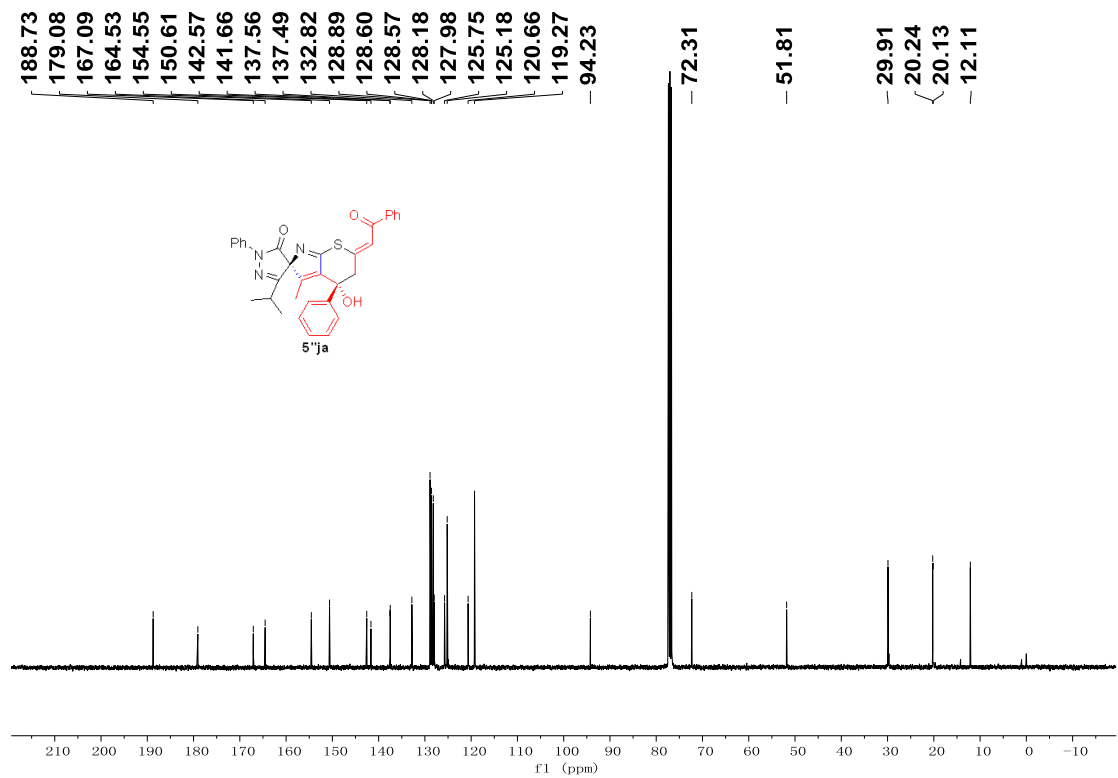

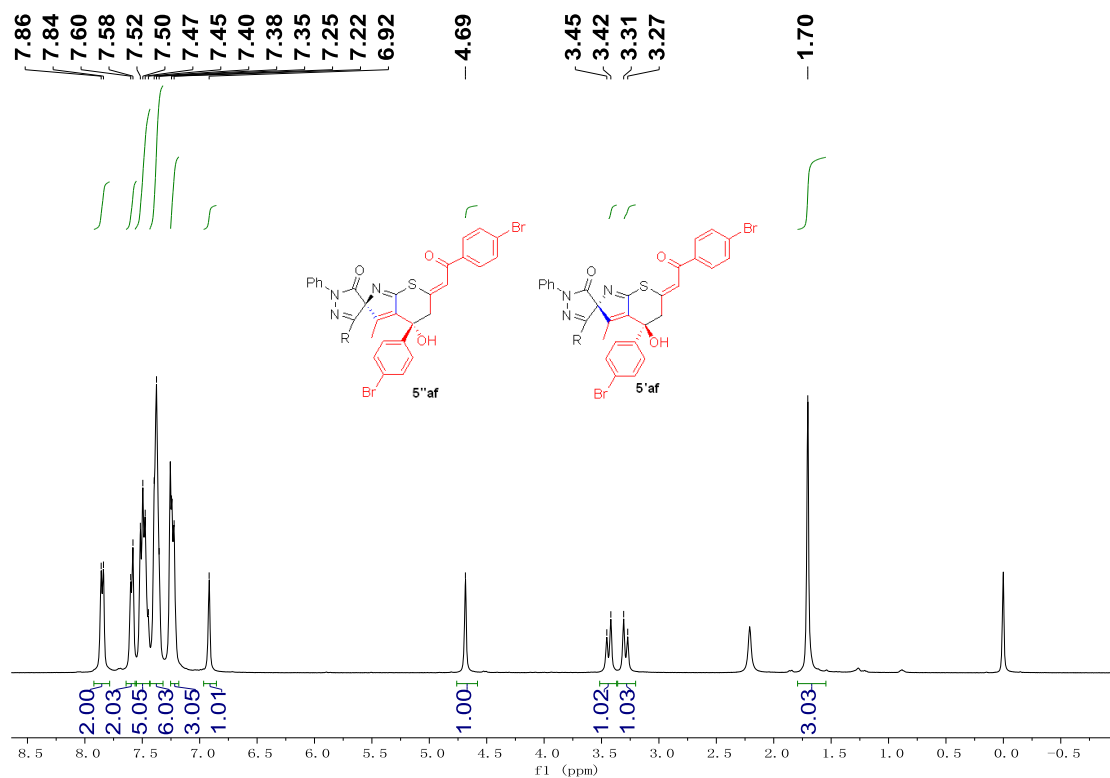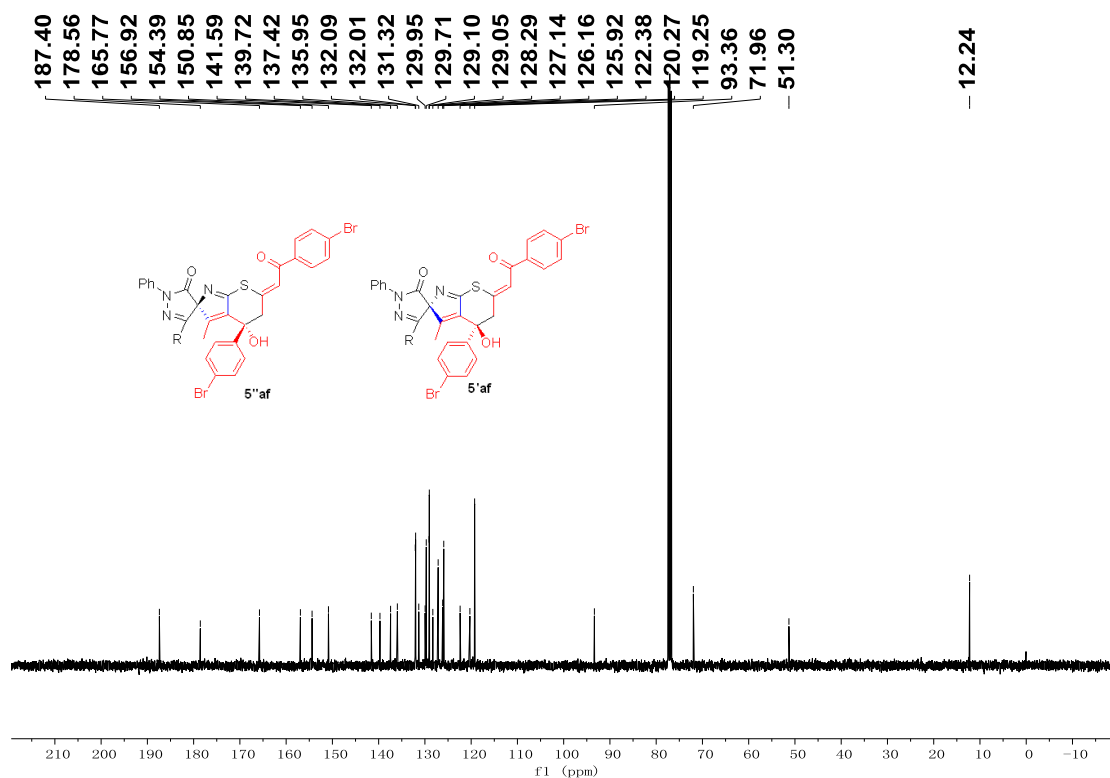

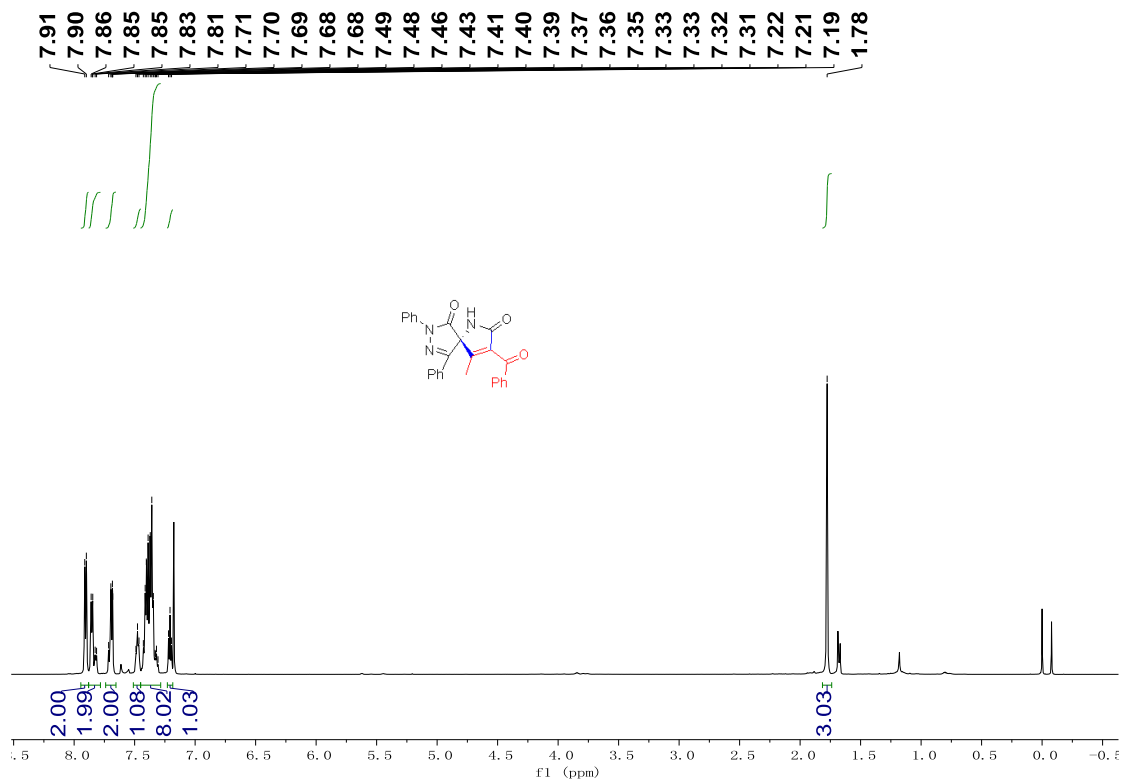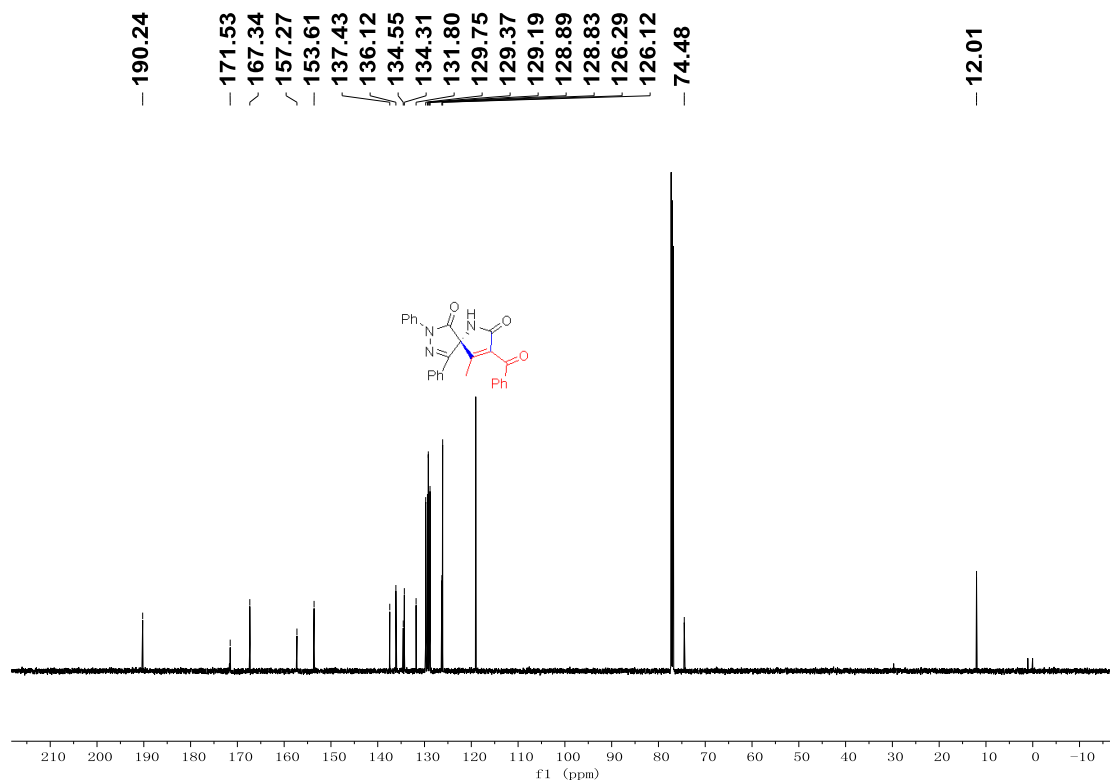

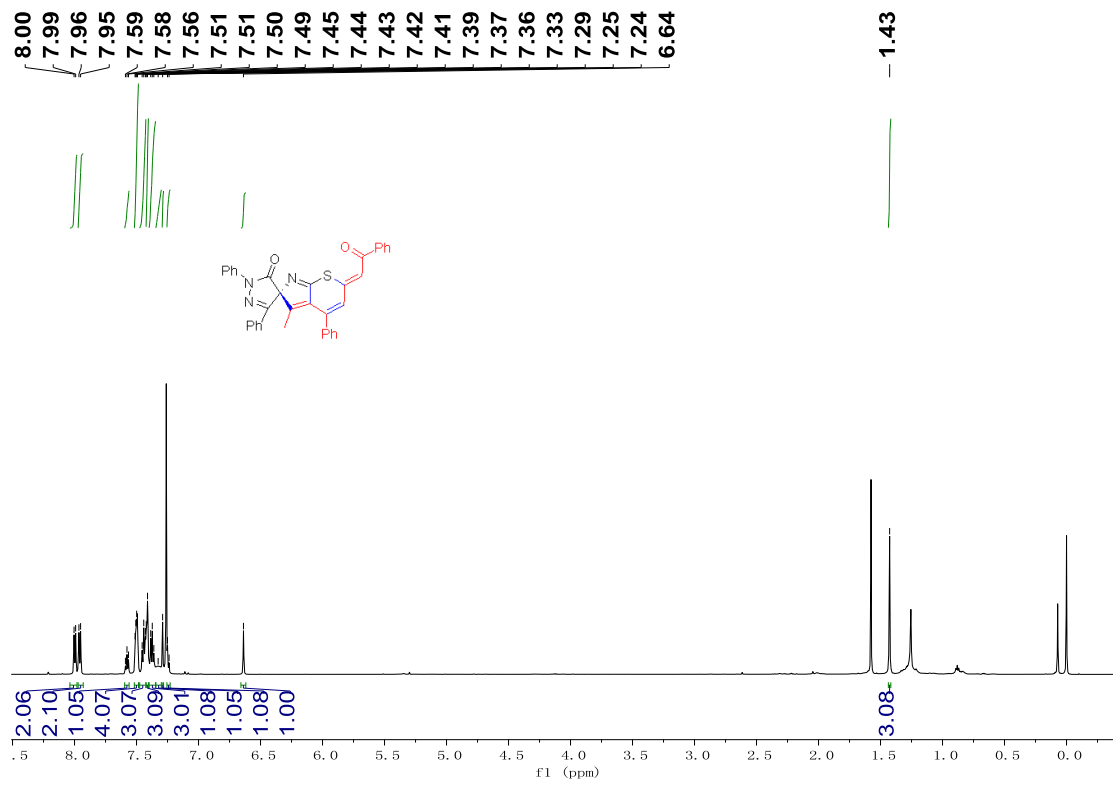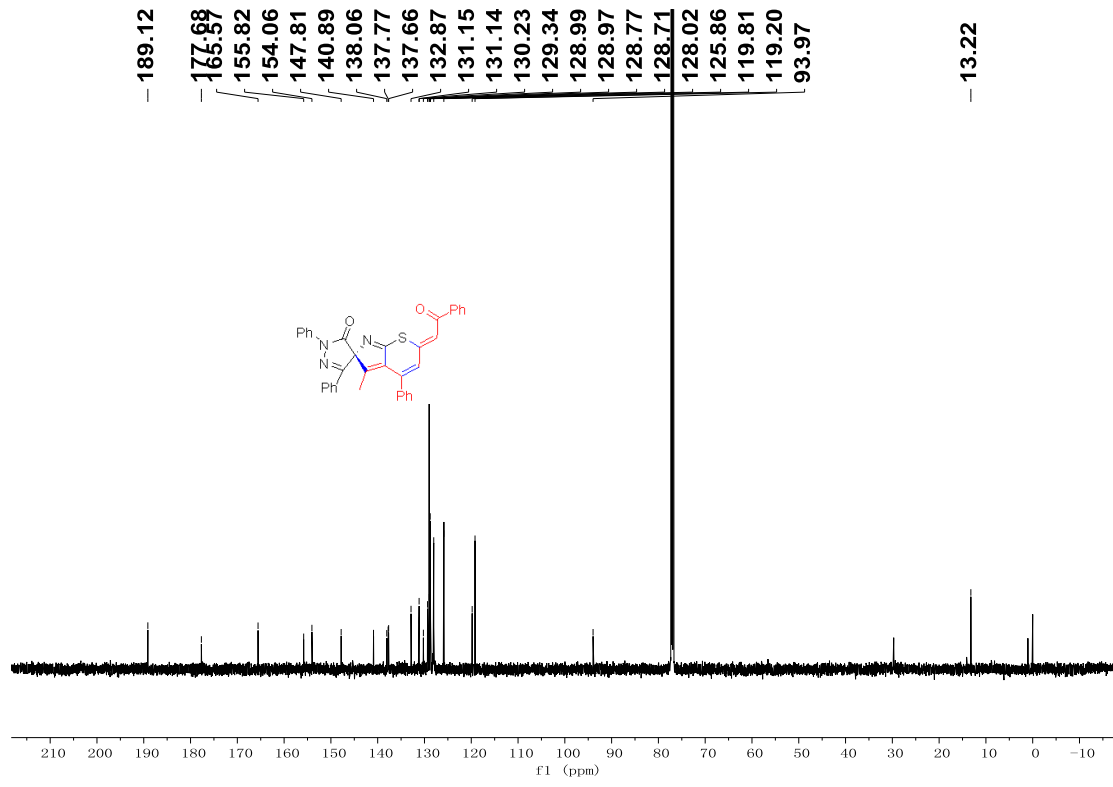

Supplement: d0cc07113g1.pdf [file d0cc07113g1.pdf]
